# Supplementary material
Source: PubMed Central journal article supplement (PMC6054105)

## Supporting Information

### **Catalytic Asymmetric Direct Aldol Reaction of $\alpha$ -Alkyl Azlactones and Aliphatic Aldehydes**

Yang Zheng and Li Deng\*

*Department of Chemistry*

*Brandeis University*

*Waltham, Massachusetts 02454-9110, United States*

## Table of contents:

|                                                                          |    |
|--------------------------------------------------------------------------|----|
| 1. General information.....                                              | 1  |
| 2. Materials and methods.....                                            | 1  |
| 3. Aldol reaction of azlactones and aliphatic aldehydes.....             | 5  |
| 4. Transformation of Aldol products.....                                 | 13 |
| 5. Determination of relative configurations.....                         | 18 |
| 6. Determination of absolute configurations.....                         | 21 |
| 7. References.....                                                       | 23 |
| 8. $^1\text{H}$ and $^{13}\text{C}$ NMR Spectra, HPLC chromatograms..... | 24 |

## 1. General information.

$^1\text{H}$  and  $^{13}\text{C}$  NMR spectra were recorded on a Varian instrument (400 MHz and 100 MHz, respectively) and internally referenced to tetramethylsilane signal or residual protio solvent signals. Data for  $^1\text{H}$  NMR are recorded as follows: chemical shift ( $\delta$ , ppm), multiplicity (s, singlet; d, doublet; t, triplet; q, quartet; m, multiplet), integration, coupling constant (Hz). Data for  $^{13}\text{C}$  NMR are reported in terms of chemical shift ( $\delta$ , ppm). Infrared spectra were recorded on a Perkin Elmer FT-IR Spectrometer and are reported in frequency of absorption. Low resolution and high resolution mass spectra were recorded on either a Micromass 70-VSE-B instrument (EI, CI) or a Micromass Q-TOF instrument (ESI). Specific rotations were measured on a Jasco Digital Polarimeter.

High performance liquid chromatography (HPLC) analyses were performed on a Hewlett Packard 1100 Series instrument equipped with a quaternary pump, using Daicel Chiralpak AD, AS, AD-H and AS-H columns, Daicel Chiralcel OJ, OJ-H Columns. UV absorption was monitored at 254 nm.

## 2. Materials and methods

### A. Aliphatic aldehydes:

Aldehydes **7a-c** were purchased from Sigma-Aldrich and were distilled before use. Aldehyde **7d** was purchased from Alfa Aesar and was purified by flash column chromatography before use.

### B. 4-Alkyl-2-phenyl-5-(4*H*)-oxazolones (azlactones):

All natural and unnatural amino acids were purchased from Sigma Aldrich and used as received. Benzoyl chloride was purchased from Sigma Aldrich and used without out further

purification. EDCI was purchased from TCI and used without further purification. Thionyl chloride was purchased from Sigma Aldrich and distilled before use.

General procedure for the preparation of *N*-benzoyl amino acids:

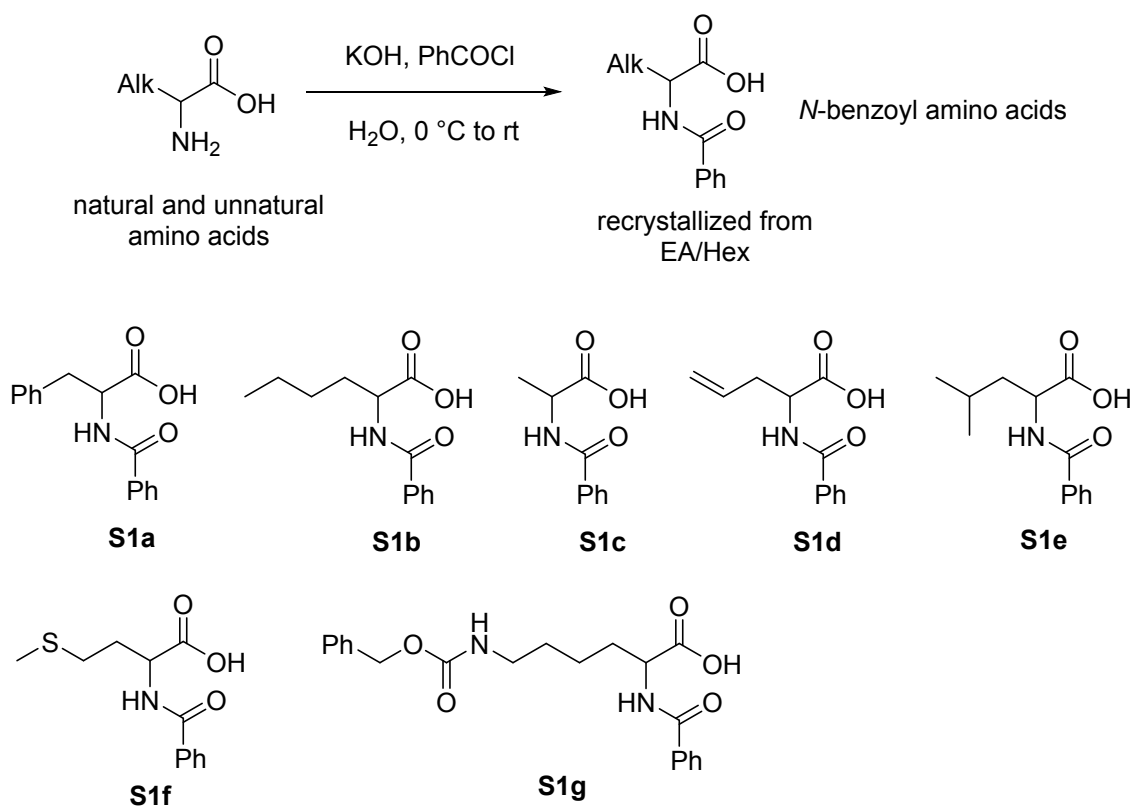

To the mixture of a DL-amino acid (10 mmol) and KOH (23 mmol, 2.3 eq) in water was added benzoyl chloride (11 mmol, 1.1 eq) at 0 °C dropwise. The reaction was allowed to warm to room temperature and was stirred for one day. The reaction mixture was acidified with 6N HCl carefully to adjust the pH to 1 and was then extracted with EA. The combined organic phase was evaporated and the crude solid product was recrystallized from EA/Hex to give the corresponding *N*-benzoyl amino acid. All spectroscopic data were in accordance with reported literature data<sup>1-5</sup>.

General procedure for the preparation of azlactones:



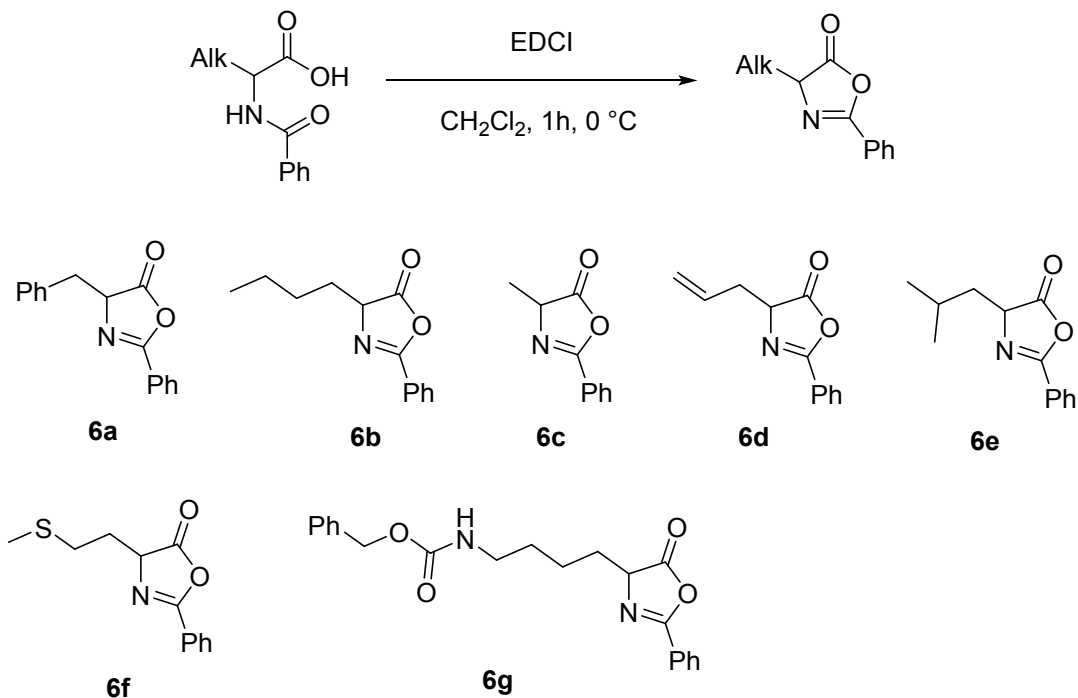

To the stirred suspension of an *N*-benzoyl amino acid (0.5 mmol) in  $\text{CH}_2\text{Cl}_2$  (5 mL, 0.1 M) cooled in an ice bath was added EDCI in one portion (0.5 mmol, 1 eq). After 1h, the reaction was diluted with 20 mL of  $\text{Et}_2\text{O}$ , washed with water (15 mL x 2) and brine (10 mL). The combined organic phase was dried over  $\text{MgSO}_4$ , filtered and evaporated to give the corresponding azlactone in reasonably pure form without further purification. The spectroscopic data of all azlactones (**6a-h**) were in accordance with reported literature data<sup>6-8</sup>.

### C. Catalysts

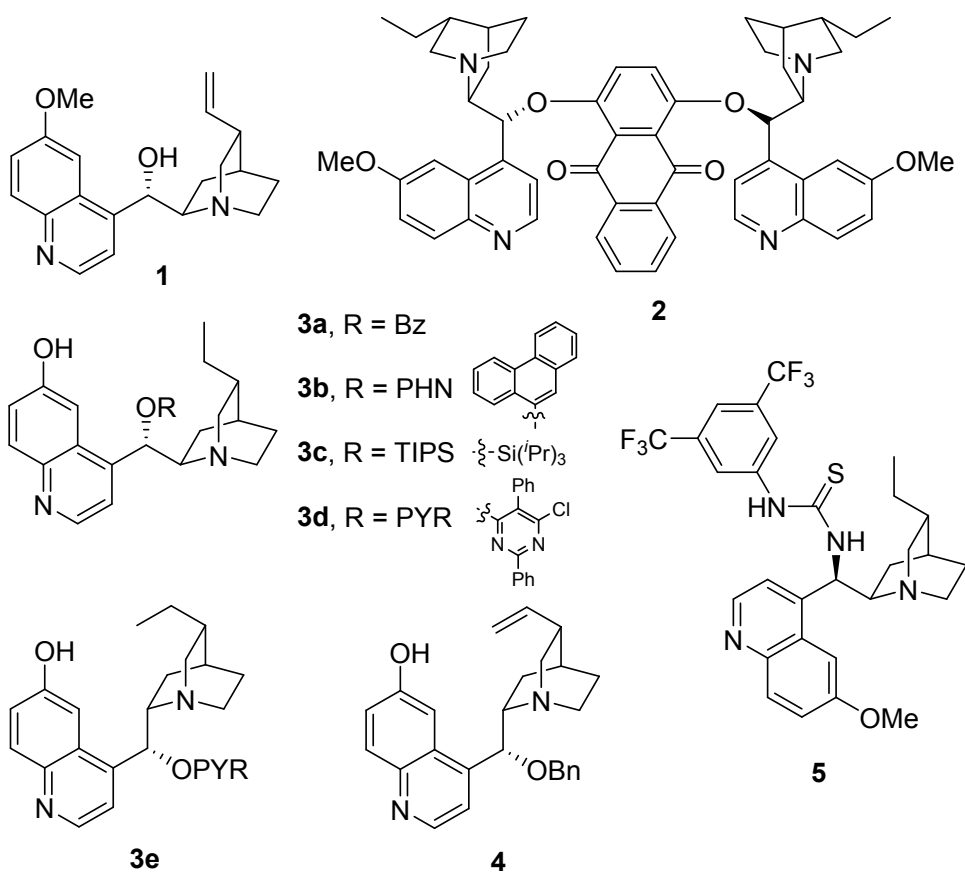

Catalysts **1** and **2** were purchased from Sigma Aldrich and used without further purification. All the other catalysts were synthesized according to literature procedures<sup>9-14</sup>.

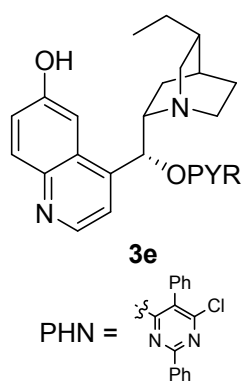

Catalyst **3e** was obtained as a white solid.  $[\alpha]_{\text{D}}^{20} = +312.3$  ( $c = 1.22$ ,  $\text{CH}_2\text{Cl}_2$ ). **<sup>1</sup>H NMR** (400 MHz,  $\text{CDCl}_3$ ):  $\delta = 9.45$  (br, 1H), 8.74 – 8.49 (m, 2H), 7.98 (d,  $J = 9.0$  Hz, 1H), 7.88 (d,  $J = 6.4$  Hz, 2H), 7.59 (t,  $J = 7.3$  Hz, 2H), 7.51 (t,  $J = 9.2$  Hz, 3H), 7.26 (d,  $J = 9.5$  Hz, 1H), 7.23 – 7.14 (m, 2H), 7.04 – 6.92 (m, 3H), 3.18 – 2.98 (m, 3H), 2.74 – 2.56 (m, 1H), 2.27 (d,  $J = 11.8$  Hz, 1H), 1.81 – 1.67 (m, 1H), 1.59 (s, 1H), 1.53 – 1.30 (m, 2H), 1.20 – 1.01 (m, 3H), 0.89 – 0.76 (m, 1H), 0.69 (t,  $J = 7.3$  Hz, 3H). **<sup>13</sup>C NMR** (100 MHz,  $\text{CDCl}_3$ ):  $\delta = 166.13, 162.84, 159.82, 157.22, 146.46, 144.08, 143.72, 135.26, 132.31, 131.27, 131.08, 130.02, 128.77, 128.74, 128.43, 128.25, 127.41, 123.18, 118.69, 117.27, 107.71, 77.48, 77.16, 76.84, 76.53, 58.60, 58.37, 43.50, 36.89, 27.35, 26.73, 25.01, 20.54, 11.94$ . **IR**

(neat):  $\nu = 3054, 2957, 2953, 2877, 2360, 2338, 1619, 1571, 1515, 1407, 1377, 1264, 1210, 1030, 999, 846, 809, 735, 700 \text{ cm}^{-1}$ . **HRMS** (ESI/[M+H]<sup>+</sup>) = Calcd. for C<sub>26</sub>H<sub>29</sub>N<sub>2</sub>O<sub>3</sub> m/z = 577.2370, found m/z = 577.2368.

#### D. The other materials:

Molecular Sieves (4Å, purchased from Alfa Aesar) were dried in a round-bottom flask under vacuum with a Bunsen burner. Triethylamine, dihydropyran (DHP) and pyridinium *p*-toluenesulfonate (PPTS) were purchased from Alfa Aesar and used without further purification. HCl in MeOH (~1.25 M) was purchased from Sigma Aldrich and was used without further purification. Thionyl chloride was purchased from Sigma Aldrich and distilled before use. 4-(Dimethylamino)pyridine (DMAP) was purchased from Sigma Aldrich and used as received.

### 3. Aldol reaction of azlactones and aliphatic aldehydes

General procedure for racemic reactions (Table 1 & 2):

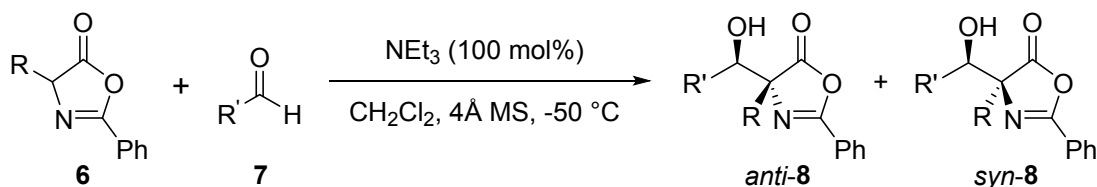

Freshly prepared azlactone **6** (0.5 mmol), freshly distilled or purified aldehyde **7** (1 mmol) and freshly dried 4Å Molecular Sieves (50 mg) were added to a vial (22 mL), followed by CH<sub>2</sub>Cl<sub>2</sub> (5 mL). The vial was gently shaken and then placed in a -50 °C freezer. After 15 minutes, triethylamine (70 μL) was added by a micro syringe. The vial was gently shaken again and was placed back to the -50 °C freezer. The reaction progress was monitored by TLC. Usually it takes 3 days to complete. The reaction mixture was passed through a short pad of silica gel with washing by Et<sub>2</sub>O. The filtrate was concentrated to give a crude product which was suitable

for HPLC analysis and further transformations. All crude products were stored in a -50 °C freezer due to instability.

General procedure for asymmetric reactions (Table 1 & 2):

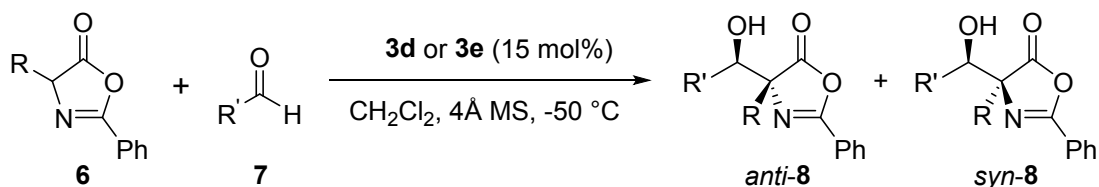

Freshly prepared azlactone **6** (0.1mmol), catalyst **3d** or **3e** (8.7 mg, 0.015 mmol) and freshly dried 4Å Molecular Sieves (10 mg) were added to a vial (2 mL), followed by CH<sub>2</sub>Cl<sub>2</sub> (1 mL). The vial was gently shaken and then placed in a -50 °C freezer. After 15 minutes, freshly distilled or purified aldehyde **7** (0.15 mmol) was added by a micro syringe. The vial was gently shaken again and was placed back to the -50 °C freezer. The reaction progress was monitored by TLC (All reaction times in Table 1 and 2 were not optimized). The reaction mixture was passed through a short pad of silica gel with washing by Et<sub>2</sub>O. The filtrate was concentrated to give the crude product, which was subject to vacuum to remove solvent and aldehyde residues to give product **8** in reasonably pure form. Product **8ad** was an exception, which was purified by a short deactivated silica gel column (Hex to 1/20 = EA/Hex). All products were stored in a -50 °C freezer due to instability.

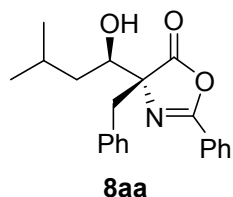

Product **8aa** was obtained as a colorless oil (31.2 mg) from a reaction catalyzed by **3d**. Enantiomeric excess and diastereometric ratio were determined by HPLC analysis: Daicel Chiralcel AS-H, Hexanes/IPA = 95/5, 1.0 ml/min,  $\lambda = 254$  nm,  $t$  (*anti*, minor) = 13.91 min,  $t$  (*anti*, major) =

92% yield, 94% ee, *anti/syn* = 97.5/2.5, 88 h 16.59 min,  $t$  (*syn*, major) = 25.53,  $t$  (*syn*, minor) = 39.98.  $[\alpha]_D^{20} = +129.3$  (c = 0.31, CH<sub>2</sub>Cl<sub>2</sub>). **<sup>1</sup>H NMR** (400 MHz, CDCl<sub>3</sub>):  $\delta = 7.78$  (d,  $J = 7.7$  Hz, 2H), 7.54 – 7.45 (m, 1H), 7.38 (t,  $J = 7.7$  Hz, 2H), 7.19 – 7.04 (m, 5H), 4.07 (dd,  $J = 10.3, 5.5$  Hz, 1H), 3.38 (d,  $J = 13.4$  Hz, 1H), 3.25 (d,  $J = 13.4$  Hz, 1H), 2.66 (d,  $J = 6.6$  Hz, 1H), 2.00 – 1.84 (m, 1H), 1.73 –

1.62 (m, 1H), 1.36 – 1.26 (m, 1H), 0.96 (dd,  $J = 11.3, 6.6$  Hz, 6H).  $^{13}\text{C NMR}$  (100 MHz,  $\text{CDCl}_3$ ):  $\delta = 178.00, 161.37, 134.21, 132.84, 130.26, 128.79, 128.26, 127.97, 127.29, 125.36, 78.93, 73.12, 40.15, 40.12, 24.63, 24.00, 21.26$ . **IR** (neat):  $\nu = 3242, 2949, 2925, 2601, 2496, 2360, 1818, 1724, 1649, 1602, 1581, 1496, 1450, 1367, 1385, 1322, 1337, 1292, 1238, 1212, 1171, 1141, 1086, 1058, 977, 924, 902, 883, 858, 808, 776, 743, 698, 643, 620, 611$   $\text{cm}^{-1}$ . **HRMS** (ESI/[ $\text{M}+\text{H}$ ] $^+$ ) = Calcd. for  $\text{C}_{21}\text{H}_{23}\text{NO}_3$   $m/z = 338.1756$ , found  $m/z = 338.1752$ .

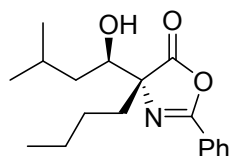

**8ba**

98% yield, 95% ee,  
*anti/syn* = 98/2, 102 h

Product **8ba** was obtained as a colorless oil (29.6 mg) from a reaction catalyzed by **3d**. Enantiomeric excess and diastereometric ratio were determined by HPLC analysis: Daicel Chiralpak AD-H connected with AD, Hexanes/IPA = 95/5, 0.8 ml/min,  $\lambda = 254$  nm,  $t$  (*anti*, minor) = 17.02 min,  $t$  (*syn*, major) = 18.38 min,  $t$  (*anti*, major) = 19.24,  $t$  (*syn*, minor) = 22.86.

$[\alpha]_{\text{D}}^{20} = +13.1$  ( $c = 0.36, \text{CH}_2\text{Cl}_2$ ).  $^1\text{H NMR}$  (400 MHz,  $\text{CDCl}_3$ ):  $\delta = 7.96$  (d,  $J = 8.0$  Hz, 2H), 7.57 (t,  $J = 7.3$  Hz, 1H), 7.46 (t,  $J = 7.7$  Hz, 2H), 3.95 (d,  $J = 10.8$  Hz, 1H), 2.67 (s, 1H), 2.08 – 1.79 (m, 3H), 1.72 – 1.58 (m, 1H), 1.37 – 1.04 (m, 5H), 0.94 (dd,  $J = 12.4, 6.6$  Hz, 6H), 0.85 (t,  $J = 7.3$  Hz, 3H).  $^{13}\text{C NMR}$  (100 MHz,  $\text{CDCl}_3$ )  $\delta = 178.71, 161.56, 132.97, 128.94, 128.14, 125.55, 77.95, 73.06, 39.50, 33.74, 25.99, 24.56, 24.00, 22.74, 21.21, 13.95$ . **IR** (neat):  $\nu = 3255, 2959, 2944, 2863, 1820, 1642, 1464, 1451, 1365, 1342, 1323, 1289, 1261, 1184, 1153, 1077, 1067, 986, 963, 889, 854, 840, 797, 778, 734, 697, 684, 614$   $\text{cm}^{-1}$ . **HRMS** (ESI/[ $\text{M}+\text{H}$ ] $^+$ ) = Calcd. for  $\text{C}_{18}\text{H}_{26}\text{NO}_3$   $m/z = 304.1913$ , found  $m/z = 304.1909$ .

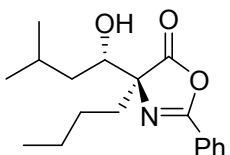

**ent-8ba**

97% yield, -90% ee,  
*anti/syn* = 97.5/2.5, 142 h

Product *ent-8ba* was obtained as a colorless oil (29.5 mg) from a reaction catalyzed by **3e**. Enantiomeric excess and diastereometric ratio were determined by HPLC analysis: Daicel Chiralpak AD-H connected with AD, Hexanes/IPA = 95/5, 0.8 ml/min,  $\lambda = 254$  nm,  $t$  (*anti*, major) = 17.57 min,  $t$  (*syn*, minor) = 18.85 min,  $t$  (*anti*, minor) = 19.66,  $t$  (*syn*, major) = 23.30.  $[\alpha]_{\text{D}}^{20} = +10.7$  ( $c = 0.37, \text{CH}_2\text{Cl}_2$ ). All the

other data were the same as product **8ba**.

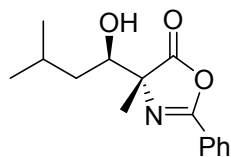

**8ca**

Product **8ca** was obtained as a colorless oil (24 mg) from a reaction catalyzed by **3d**. Enantiomeric excess and diastereometric ratio were determined by HPLC analysis: Daicel Chiralpak AD-H, Hexanes/IPA = 99/1, 1.0 ml/min,  $\lambda$  = 254 nm, t (*anti*, minor) = 27.84 min, t (*anti*, major) = 31.96 min, t (*anti*, major) = 37.02, t (*syn*, minor) = 38.29.  $[\alpha]_{\text{D}}^{20} = +10.1$  (c = 0.33, CH<sub>2</sub>Cl<sub>2</sub>). **<sup>1</sup>H NMR** (400 MHz, CDCl<sub>3</sub>):  $\delta$  = 8.00 (d, J = 7.4 Hz, 1H), 7.59 (t, J = 7.4 Hz, 1H), 7.49 (t, J = 7.6 Hz, 2H), 3.90 (dd, J = 10.5, 4.0 Hz, 1H), 2.20 (s, 1H), 1.95 – 1.78 (m, 1H), 1.69 – 1.58 (m, 1H), 1.55 (s, 3H), 1.29 – 1.22 (m, 1H), 0.94 (dd, J = 12.4, 6.6 Hz, 6H). **<sup>13</sup>C NMR** (100 MHz, CDCl<sub>3</sub>):  $\delta$  = 179.00, 161.47, 133.00, 128.93, 128.11, 125.61, 73.62, 73.49, 39.35, 24.59, 23.96, 21.20, 20.48. **IR** (neat):  $\nu$  = 3290, 2955, 2870, 2359, 2337, 1819, 1739, 1649, 1602, 1581, 1495, 1451, 1368, 1323, 1292, 1216, 1173, 1109, 1094, 1069, 1031, 1000, 957, 929, 885, 849, 780, 738, 696, 613 cm<sup>-1</sup>. **HRMS** (ESI/[M+H]<sup>+</sup>) = Calcd. for C<sub>15</sub>H<sub>20</sub>NO<sub>3</sub> m/z = 262.1443, found m/z = 262.1435.

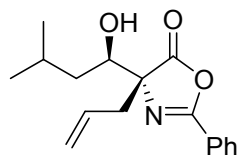

**8da**

Product **8ca** was obtained as a light yellow oil (27.4 mg) from a reaction catalyzed by **3d**. Enantiomeric excess and diastereometric ratio were determined by HPLC analysis: Daicel Chiralpak AD-H, Hexanes/IPA = 96/4, 1.0 ml/min,  $\lambda$  = 254 nm, t (*anti*, minor) = 16.41 min, t (*syn*, major) = 18.02 min, t (*anti*, major) = 19.49, t (*syn*, minor) = 26.28.  $[\alpha]_{\text{D}}^{20} = +61$  (c = 0.72, CH<sub>2</sub>Cl<sub>2</sub>). **<sup>1</sup>H NMR** (400 MHz, CDCl<sub>3</sub>):  $\delta$  = 8.00 (d, J = 7.8 Hz, 2H), 7.59 (t, J = 7.4 Hz, 1H), 7.49 (t, J = 7.6 Hz, 2H), 5.62 (td, J = 17.0, 7.4 Hz, 1H), 5.19 (d, J = 17.0 Hz, 1H), 5.10 (d, J = 10.1 Hz, 1H), 3.97 (d, J = 10.3 Hz, 1H), 2.83 (dd, J = 13.6, 6.7 Hz, 1H), 2.67 (dd, J = 13.7, 8.0 Hz, 1H), 2.16 (d, J = 21.5 Hz, 1H), 1.96 – 1.79 (m, 1H), 1.60 (ddd, J = 14.6, 11.1, 3.8 Hz, 1H), 1.25 – 1.15 (m, 1H), 0.93 (dd, J = 11.1, 6.6 Hz, 6H). **<sup>13</sup>C NMR** (100 MHz, CDCl<sub>3</sub>):  $\delta$  = 177.98, 161.62, 133.03, 130.58, 128.93, 128.17, 125.50, 120.80, 77.91, 72.69, 39.69, 38.24, 24.55, 23.99, 21.22. **IR** (neat):  $\nu$  = 3318, 2955, 2910, 2870, 2359, 1816, 1739, 1648, 1580, 1495, 1647, 1451, 1368, 1322, 1289, 1217, 1178, 1042, 1026, 970, 925, 900, 850, 779, 700,

689, 668  $\text{cm}^{-1}$ . **HRMS** (ESI/[M+H]<sup>+</sup>) = Calcd. for  $\text{C}_{17}\text{H}_{22}\text{NO}_3$   $m/z$  = 288.1600, found  $m/z$  = 288.1598.

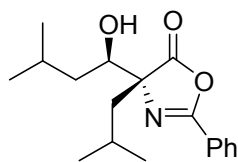

**8ea**

89% yield, 93% ee,  
*anti/syn* = 97.5/2.5, 99 h

Product **8ea** was obtained as a colorless yellow oil (27 mg) from a reaction catalyzed by **3d**. Enantiomeric excess and diastereometric ratio were determined by HPLC analysis: Daicel Chiralpak AD-H, Hexanes/IPA = 96/4, 1.0 ml/min,  $\lambda$  = 254 nm, *t* (*anti*, minor) = 12.65 min, *t* (*anti*, major) = 15.16 min, *t* (*syn*, major) = 17.11, *t* (*syn*, minor) = 25.16.

$[\alpha]_{\text{D}}^{20}$  = +52.7 ( $c$  = 0.34,  $\text{CH}_2\text{Cl}_2$ ). **<sup>1</sup>H NMR** (400 MHz,  $\text{CDCl}_3$ ):  $\delta$  = 8.03 – 7.95 (m, 2H), 8.04 – 7.97 (m, 2H), 7.59 (t,  $J$  = 7.4 Hz, 1H), 7.49 (t,  $J$  = 7.5 Hz, 2H), 3.88 (dd,  $J$  = 10.3, 5.5 Hz, 1H), 2.37 – 2.14 (m, 1H), 2.05 (dd,  $J$  = 14.0, 5.1 Hz, 1H), 1.92 – 1.77 (m, 2H), 1.70 – 1.52 (m, 2H), 1.30 – 1.19 (m, 1H), 0.95 (d,  $J$  = 6.7 Hz, 3H), 0.91 (dd,  $J$  = 6.5, 3.9 Hz, 6H), 0.83 (d,  $J$  = 6.6 Hz, 3H). **<sup>13</sup>C NMR** (100 MHz,  $\text{CDCl}_3$ ):  $\delta$  = 179.21, 161.34, 132.95, 128.97, 128.11, 125.62, 77.48, 77.16, 76.85, 74.01, 42.61, 38.89, 24.99, 24.59, 24.33, 24.02, 22.96, 21.18. **IR** (neat):  $\nu$  = 3289, 2955, 2927, 2870, 1817, 1649, 1580, 1495, 1467, 1450, 1387, 1368, 1323, 1289, 1166, 1078, 1043, 1024, 970, 885, 855, 779, 698, 654, 623, 613, 602  $\text{cm}^{-1}$ . **HRMS** (ESI/[M+H]<sup>+</sup>) = Calcd. for  $\text{C}_{18}\text{H}_{26}\text{NO}_3$   $m/z$  = 304.1913, found  $m/z$  = 304.1913.

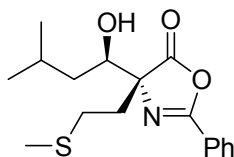

**8fa**

96% yield, 92% ee,  
*anti/syn* = 97/3, 120 h

Product **8fa** was obtained as a light yellow oil (31 mg) from a reaction catalyzed by **3d**. Enantiomeric excess and diastereometric ratio were determined by HPLC analysis: Daicel Chiralpak AD-H, Hexanes/IPA = 96.5/3.5, 1.0 ml/min,  $\lambda$  = 254 nm, *t* (*anti*, minor) = 32.10 min, *t* (*syn*, major) = 34.33 min, *t* (*syn*, minor) = 44.90, *t* (*anti*, major) = 47.92.

$[\alpha]_{\text{D}}^{20}$  = +29.8 ( $c$  = 0.4,  $\text{CH}_2\text{Cl}_2$ ). **<sup>1</sup>H NMR** (400 MHz,  $\text{CDCl}_3$ ):  $\delta$  = 7.98 (d,  $J$  = 7.6 Hz, 2H), 7.58 (t,  $J$  = 7.4 Hz, 1H), 7.48 (t,  $J$  = 7.7 Hz, 2H), 3.92 (dd,  $J$  = 10.6, 4.2 Hz, 1H), 2.56 (d,  $J$  = 6.0 Hz, 1H), 2.51 – 2.23 (m, 4H), 2.04 (s, 3H), 1.94 – 1.76 (m, 1H), 1.68 – 1.58 (m, 1H), 1.25 – 1.15 (m, 1H), 0.93 (dd,  $J$  = 14.1, 6.6 Hz, 6H). **<sup>13</sup>C NMR** (100 MHz,  $\text{CDCl}_3$ ):  $\delta$  = 178.59, 162.23, 133.13, 128.96, 128.18, 125.48, 76.63, 73.30, 39.25, 32.71, 28.91, 24.53, 23.96, 21.19, 15.21. **IR** (neat):  $\nu$  =

3460, 2956, 2911, 2869, 2360, 2337, 1812, 1739, 1649, 1580, 1495, 1451, 1367, 1321, 1292, 1216, 1139, 1070, 1066, 1009, 1001, 963, 908, 881, 850, 780, 730, 695, 647, 609 cm<sup>-1</sup>. **HRMS** (ESI/[M+H]<sup>+</sup>) = Calcd. for C<sub>17</sub>H<sub>24</sub>NO<sub>3</sub>S m/z = 322.1477, found m/z = 322.1478.

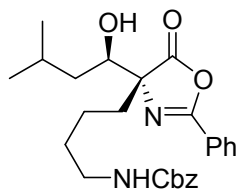

**8ga**

95% yield, 94% ee,  
*anti/syn* = 97.5/2.5, 112 h

Product **8ga** was obtained as a colorless oil (47 mg) from a reaction catalyzed by **3d**. Enantiomeric excess and diastereometric ratio were determined by HPLC analysis: Daicel Chiralpak AD-H, Hexanes/IPA = 87/13, 1.0 ml/min,  $\lambda$  = 254 nm, *t* (*anti*, minor) = 26.73 min, *t* (*anti*, major) = 32.71 min, *t* (*syn*, minor) = 36.01, *t* (*syn*, major) = 37.89.  $[\alpha]_{\text{D}}^{20}$  = +12.1 (c = 0.56, CH<sub>2</sub>Cl<sub>2</sub>). **<sup>1</sup>H NMR** (400 MHz, CDCl<sub>3</sub>):  $\delta$  = 7.98 (d, J = 7.4 Hz, 2H), 7.57 (t, J = 7.4 Hz, 1H), 7.47 (t, J = 7.6 Hz, 2H), 7.38 – 7.27 (m, 5H), 5.05 (s, 2H), 4.79 (s, 1H), 3.92 (d, J = 10.3 Hz, 1H), 3.26 – 2.97 (m, 2H), 2.63 (s, 1H), 2.11 – 1.75 (m, 3H), 1.67 – 1.55 (m, 1H), 1.55 – 1.39 (m, 2H), 1.24 – 1.04 (m, 3H), 0.91 (dd, J = 12.2, 6.6 Hz, 6H). **<sup>13</sup>C NMR** (100 MHz, CDCl<sub>3</sub>):  $\delta$  = 178.57, 161.60, 156.41, 136.57, 133.06, 128.95, 128.59, 128.18, 128.14, 125.43, 77.75, 72.94, 66.71, 40.63, 39.59, 33.40, 29.81, 24.50, 23.94, 21.17, 21.05. **IR** (neat):  $\nu$  = 3334, 2954, 2910, 2867, 1813, 1697, 1650, 1580, 1526, 1496, 1452, 1368, 1321, 1288, 1254, 1178, 1134, 1044, 1022, 972, 882, 850, 777, 736, 694, 606 cm<sup>-1</sup>. **HRMS** (ESI/[M+H]<sup>+</sup>) = Calcd. for C<sub>26</sub>H<sub>33</sub>N<sub>2</sub>O<sub>5</sub> m/z = 453.2389, found m/z = 453.2390.

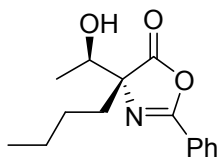

**8bb**

93% yield, 88% ee,  
*anti/syn* = 90.5/9.5, 114 h

Product **8bb** was obtained as a colorless oil (24.2 mg) from a reaction catalyzed by **3d**. Enantiomeric excess and diastereometric ratio were determined by HPLC analysis: Daicel Chiralcel OJ-H connected with OJ, Hexanes/IPA = 96/4, 0.8 ml/min,  $\lambda$  = 254 nm, *t* (*anti*, minor) = 40.78 min, *t* (*anti*, major) = 59.11 min, *t* (*syn*, minor) = 63.58, *t* (*syn*, minor) = 73.38.  $[\alpha]_{\text{D}}^{20}$  = +1.2 (c = 1.2, CH<sub>2</sub>Cl<sub>2</sub>). **<sup>1</sup>H NMR** (400 MHz, CDCl<sub>3</sub>):  $\delta$  = 8.01 (d, J = 7.3 Hz, 2H), 7.59 (t, J = 7.3 Hz, 1H), 7.49 (t, J = 7.6 Hz, 2H), 4.16 – 3.97 (m, 1H), 2.37 (s, 1H), 2.07 – 1.85 (m, 2H), 1.41 – 1.02 (m, 7H), 0.86 (t, J = 7.2 Hz, 3H). **<sup>13</sup>C NMR** (100 MHz, CDCl<sub>3</sub>):  $\delta$  = 178.54, 161.73, 133.03, 128.95, 128.17, 125.56, 77.89, 71.18, 33.56, 26.08,



22.73, 16.98, 13.94. **IR** (neat):  $\nu = 3392, 2957, 2930, 2872, 2360, 2321, 1813, 1739, 1650, 1602, 1580, 1520, 1494, 1451, 1378, 1321, 1291, 1230, 1198, 1164, 1074, 1037, 1022, 954, 913, 881, 780, 694, 671, 605 \text{ cm}^{-1}$ . **HRMS** (ESI/[M+H]<sup>+</sup>) = Calcd. for C<sub>15</sub>H<sub>20</sub>NO<sub>3</sub> m/z = 262.1443, found m/z = 262.1443.

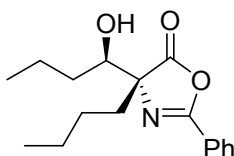

**8bc**

95% yield, 94% ee,  
anti/syn = 97.5/2.5, 112 h

Product **8bc** was obtained as a colorless oil (27.5 mg) from a reaction catalyzed by **3d**. Enantiomeric excess and diastereometric ratio were determined by HPLC analysis: Daicel Chiralpak AD-H connected with AD, Hexanes/IPA = 95/5, 0.8 ml/min,  $\lambda = 254 \text{ nm}$ , t (*anti*, minor) = 62.88 min, t (*anti*, major) = 83.69 min, t (*syn*, major) = 87.09, t (*syn*, minor) = 90.83.  $[\alpha]_{\text{D}}^{20} = +17.1$  (c = 0.35, CH<sub>2</sub>Cl<sub>2</sub>). <sup>1</sup>H NMR (400 MHz, CDCl<sub>3</sub>):  $\delta = 8.01$  (d, *J* = 7.5 Hz, 2H), 7.59 (t, *J* = 7.4 Hz, 1H), 7.49 (t, *J* = 7.6 Hz, 2H), 3.93 – 3.75 (m, 1H), 2.31 – 2.19 (m, 1H), 2.05 (td, *J* = 12.9, 4.8 Hz, 1H), 2.00 – 1.90 (m, 1H), 1.72 – 1.02 (m, 8H), 0.93 (t, *J* = 7.2 Hz, 3H), 0.86 (t, *J* = 7.3 Hz, 3H). <sup>13</sup>C NMR (100 MHz, CDCl<sub>3</sub>):  $\delta = 178.81, 161.52, 132.97, 128.93, 128.14, 125.58, 77.93, 77.48, 77.16, 76.84, 74.72, 33.68, 32.90, 25.98, 22.74, 19.49, 13.94, 13.92$ . **IR** (neat):  $\nu = 3444, 2958, 2930, 2872, 2337, 1815, 1739, 1649, 1602, 1581, 1495, 1451, 1377, 1322, 1290, 1229, 1217, 1157, 1076, 1041, 1023, 966, 880, 855, 804, 778, 732, 696, 612 \text{ cm}^{-1}$ . **HRMS** (ESI/[M+H]<sup>+</sup>) = Calcd. for C<sub>17</sub>H<sub>24</sub>NO<sub>3</sub> m/z = 290.1756, found m/z = 290.1760.

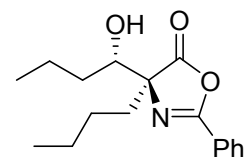

**ent-8bc**

98% yield, -92% ee,  
anti/syn = 97/3, 132 h

Product *ent-8bc* was obtained as a colorless oil (28.3 mg) from a reaction catalyzed by **3d**. Enantiomeric excess and diastereometric ratio were determined by HPLC analysis: Daicel Chiralpak AD-H connected with AD, Hexanes/IPA = 95/5, 0.8 ml/min,  $\lambda = 254 \text{ nm}$ , t (*anti*, major) = 68.47 min, t (*anti*, minor) = 94.59 min, t (*syn*, major) = 97.69, t (*syn*, minor) = 101.46. All the other data were the same as product **8bc**.

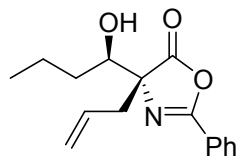

**8dc**

Product **8dc** was obtained as a yellow oil (26.5 mg) from a reaction catalyzed by **3d**. Enantiomeric excess and diastereometric ratio were determined by HPLC analysis: Daicel Chiralcel OJ-H, Hexanes/IPA = 97/3, 1.0 ml/min,  $\lambda = 254$  nm,  $t$  (*anti*, minor) = 18.09 min,  $t$  (*anti*, major) = 21.01 min,  $t$  (*syn*, minor) = 26.48,  $t$  (*syn*, minor) = 34.97.  $[\alpha]_{\text{D}}^{20} = +26.9$  (c = 0.33, CH<sub>2</sub>Cl<sub>2</sub>). **<sup>1</sup>H NMR** (400 MHz, CDCl<sub>3</sub>):  $\delta = 8.02 - 7.95$  (m, 2H), 7.59 (t,  $J = 6.8$  Hz, 1H), 7.53 – 7.44 (m, 2H), 5.62 (td,  $J = 17.0, 7.8$  Hz, 1H), 5.19 (d,  $J = 17.0$  Hz, 1H), 5.10 (d,  $J = 10.1$  Hz, 1H), 3.93 – 3.82 (m, 1H), 2.85 (dd,  $J = 13.6, 6.5$  Hz, 1H), 2.68 (dd,  $J = 13.6, 7.9$  Hz, 1H), 2.45 – 2.19 (m, 1H), 1.69 – 1.51 (m, 2H), 1.51 – 1.30 (m, 2H), 0.93 (t,  $J = 7.2$  Hz, 3H). **<sup>13</sup>C NMR** (100 MHz, CDCl<sub>3</sub>):  $\delta = 178.00, 161.61, 133.04, 130.59, 128.92, 128.16, 125.47, 120.80, 77.92, 77.48, 77.16, 76.84, 74.28, 38.17, 33.07, 19.41, 13.91$ . **IR** (neat):  $\nu = 3400, 2960, 2900, 2848, 1815, 1648, 1580, 1494, 1451, 1322, 1289, 1179, 1156, 1042, 1024, 969, 926, 889, 779, 690$  cm<sup>-1</sup>. **HRMS** (ESI/[M+H]<sup>+</sup>) = Calcd. for C<sub>16</sub>H<sub>20</sub>NO<sub>3</sub>  $m/z = 274.1443$ , found  $m/z = 274.1446$ .

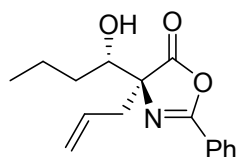

**ent-8dc**

Product **ent-8dc** was obtained as a yellow oil (25.8 mg) from a reaction catalyzed by **3d**. Enantiomeric excess and diastereometric ratio were determined by HPLC analysis: Daicel Chiralcel OJ-H, Hexanes/IPA = 97/3, 1.0 ml/min,  $\lambda = 254$  nm,  $t$  (*anti*, major) = 18.21 min,  $t$  (*anti*, minor) = 20.54 min,  $t$  (*syn*, major) = 25.48,  $t$  (*syn*, minor) = 35.65.  $[\alpha]_{\text{D}}^{20} = -26.2$  (c = 0.33, CH<sub>2</sub>Cl<sub>2</sub>). All the other data were the same as product **8dc**.

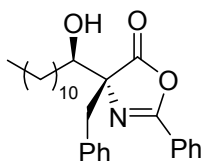

**8ad**

Product **8ad** was obtained as a colorless oil (36 mg) from a reaction catalyzed by **3d**. Enantiomeric excess and diastereometric ratio were determined by HPLC analysis: Daicel Chiralcel AS-H, Hexanes/IPA = 96.5/3.5, 1.0 ml/min,  $\lambda = 254$  nm,  $t$  (*anti*, minor) = 16.62 min,  $t$  (*anti*, major) = 20.50 min,  $t$  (*syn*, major) = 29.36,  $t$  (*syn*, minor) = 44.78.  $[\alpha]_{\text{D}}^{20} = +74$  (c = 0.45, CH<sub>2</sub>Cl<sub>2</sub>). **<sup>1</sup>H NMR** (400 MHz, CDCl<sub>3</sub>):  $\delta = 7.81$  (d,  $J = 7.5$  Hz, 2H), 7.51 (t,  $J = 7.5$  Hz, 1H), 7.39 (t,  $J = 7.6$  Hz, 2H), 7.17 – 7.05 (m, 5H), 3.91

(dd,  $J = 12.5, 6.7$  Hz, 1H), 3.39 (d,  $J = 13.4$  Hz, 1H), 3.23 (d,  $J = 13.4$  Hz, 1H), 2.16 (d,  $J = 7.2$  Hz, 1H), 1.65 – 1.47 (m, 5H), 1.22 (s, 20H), 0.85 (t,  $J = 6.7$  Hz, 3H).  **$^{13}\text{C}$  NMR** (100 MHz,  $\text{CDCl}_3$ ):  $\delta = 178.05, 161.35, 134.23, 132.84, 130.27, 128.78, 128.25, 127.97, 127.27, 125.37, 78.94, 77.48, 77.16, 76.84, 74.97, 40.10, 32.04, 31.48, 29.75, 29.72, 29.70, 29.48, 26.32, 22.82, 14.27$ . **IR** (neat):  $\nu = 3293, 2922, 2852, 1816, 1714, 1650, 1581, 1495, 1452, 1322, 1292, 1237, 1171, 1056, 973, 893, 777, 696, 611$   $\text{cm}^{-1}$ . **HRMS** (ESI/[ $\text{M}+\text{H}$ ] $^+$ ) = Calcd. for  $\text{C}_{16}\text{H}_{20}\text{NO}_3$   $m/z = 436.2852$ , found  $m/z = 436.2852$ .

#### 4. Transformation of Aldol products

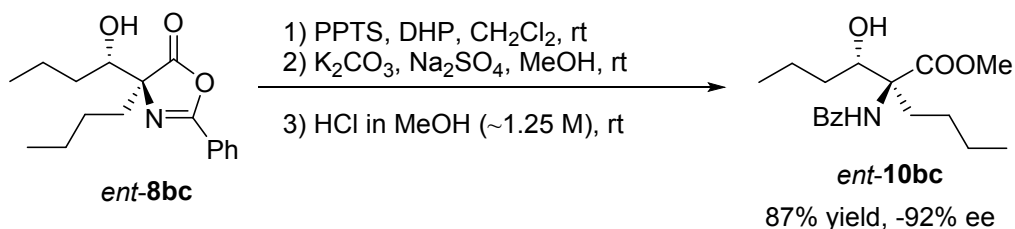

Aldol product *ent-8bc* was made according to the general procedure reported in previous section. To a 4 mL vial containing Aldol product *ent-8bc* (from 0.1 mmol scale reaction) were added dihydropyran (DHP, 0.14 mL, 1.5 mmol, 15 eq),  $\text{CH}_2\text{Cl}_2$  (0.5 mL) and pyridinium *p*-toluenesulfonate (PPTS, 25.1 mg, 0.1 mmol, 1 eq) sequentially. The reaction mixture was stirred at room temperature for 20 h. After protection with DHP was complete, anhydrous  $\text{Na}_2\text{SO}_4$  (100 mg), anhydrous MeOH (0.5 mL) and  $\text{K}_2\text{CO}_3$  (34.6 mg, 0.25 mmol, 2.5 eq) were added to the reaction mixture. After 16 h, HCl in MeOH (1 mL, ~1.25 M) was added. After stirring at room temperature for 19.5 h, the reaction was concentrated and purified by flash column chromatography (1/10 = EA/Hex to 1/5) to give *ent-10bc* as a colorless oil (28 mg, 87% yield based on a 0.1 mmol Aldol reaction). All reaction times were not optimized. Racemic product was obtained according to the same procedure. Enantiomeric excess of *ent-10bc* was determined by HPLC analysis: Daicel Chiralpak AD-H, Hexanes/IPA = 90/10, 1.0 ml/min,  $\lambda = 254$  nm,  $t$  (*anti*, major) = 9.17 min,  $t$  (*anti*, minor) = 10.23 min.  $[\alpha]_{\text{D}}^{20} = -11.1$  ( $c = 0.35$ ,  $\text{CH}_2\text{Cl}_2$ ).  **$^1\text{H}$  NMR** (400 MHz,  $\text{CDCl}_3$ ):  $\delta = 7.85$  (d,  $J = 7.4$  Hz, 2H), 7.70 (s, 1H), 7.57 (t,  $J = 7.3$  Hz, 1H), 7.49 (t,  $J = 7.5$  Hz, 2H), 5.67 (d,  $J = 10.9$  Hz, 1H), 4.06 – 3.96 (m, 1H), 3.86 (s, 3H), 2.66 (td,  $J$

= 14.0, 3.9 Hz, 1H), 2.01 – 1.87 (m, 1H), 1.61 (tt,  $J = 11.4, 5.9$  Hz, 1H), 1.46 – 1.17 (m, 6H), 1.13 – 0.92 (m, 2H), 0.86 (q,  $J = 7.0$  Hz, 6H).  $^{13}\text{C}$  NMR (100 MHz,  $\text{CDCl}_3$ ):  $\delta = 174.21, 167.93, 133.78, 132.29, 128.92, 127.29, 75.36, 71.10, 53.63, 36.33, 32.22, 26.56, 22.66, 19.32, 14.05, 14.04$ . IR (neat):  $\nu = 3396, 2957, 2931, 2872, 1729, 1645, 1602, 1579, 1516, 1485, 1440, 1339, 1290, 1249, 1215, 1185, 1128, 1074, 1016, 960, 914, 866, 822, 711, 690, 664$   $\text{cm}^{-1}$ . HRMS (ESI/[ $\text{M}+\text{H}$ ] $^+$ ) = Calcd. for  $\text{C}_{18}\text{H}_{28}\text{NO}_4$   $m/z = 322.2018$ , found  $m/z = 322.2011$ .

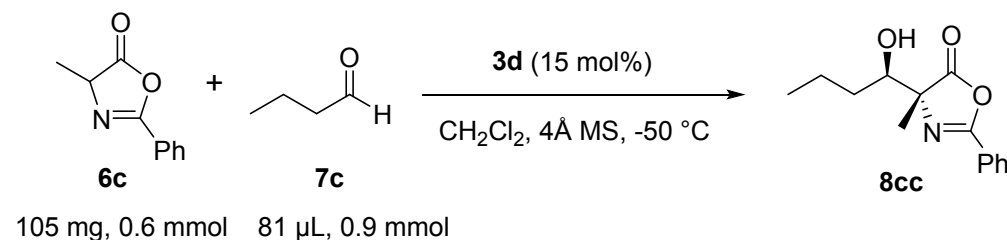

Aldol product **8cc** was made from a 0.6 mmol reaction (4 d) according to the general procedure reported in the previous section. It was used directly for the following steps.

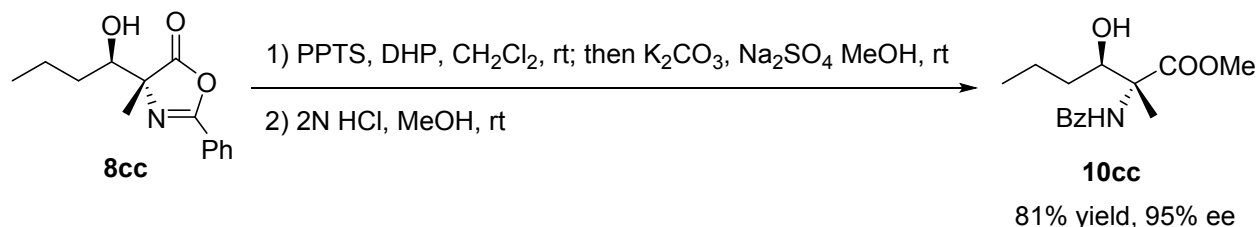

To a 22 mL vial containing Aldol product **8cc** (from 0.6 mmol scale reaction) were added dihydropyran (DHP, 0.82 mL, 9 mmol, 15 eq),  $\text{CH}_2\text{Cl}_2$  (3 mL) and pyridinium *p*-toluenesulfonate (PPTS, 151 mg, 0.6 mmol, 1 eq) sequentially. The reaction mixture was stirred at room temperature for 9 h. After protection with DHP was complete, anhydrous  $\text{Na}_2\text{SO}_4$  (600 mg), anhydrous MeOH (3 mL) and  $\text{K}_2\text{CO}_3$  (207 mg, 1.5 mmol, 2.5 eq) were added to the reaction mixture. After 6.5 h, the reaction mixture was passed through a short silica gel column and concentrated. Then 2N HCl (1 mL) and MeOH (4 mL) was added. After stirring at room temperature for 17 h, the reaction was concentrated and purified by flash column chromatography (1/5 = EA/Hex to 2/5) to give **10cc** as a colorless oil (135 mg, 81%

yield based on a 0.6 mmol Aldol reaction). All reaction times were not optimized. Racemic product was obtained according to the same procedure. Enantiomeric excess of **10cc** was determined by HPLC analysis: Daicel Chiralpak AD-H, Hexanes/IPA = 90/10, 1.0 ml/min,  $\lambda$  = 254 nm, t (*anti*, minor) = 12.87 min, t (*anti*, major) = 13.80 min.  $[\alpha]_{\text{D}}^{20} = -8.4$  (c = 0.45, CH<sub>2</sub>Cl<sub>2</sub>). **<sup>1</sup>H NMR** (400 MHz, CDCl<sub>3</sub>):  $\delta$  = 7.83 (d, *J* = 7.6 Hz, 2H), 7.64 (s, 1H), 7.56 (t, *J* = 7.3 Hz, 1H), 7.48 (t, *J* = 7.4 Hz, 2H), 5.18 (d, *J* = 10.6 Hz, 1H), 3.98 (t, *J* = 10.1 Hz, 1H), 3.86 (s, 3H), 1.74 (s, 3H), 1.69 – 1.53 (m, 1H), 1.46 – 1.27 (m, 2H), 1.24 – 1.10 (m, 1H), 0.88 (t, *J* = 7.0 Hz, 3H). **<sup>13</sup>C NMR** (100 MHz, CDCl<sub>3</sub>):  $\delta$  = 174.96, 167.95, 133.89, 132.31, 128.94, 127.36, 75.13, 66.15, 53.70, 35.91, 20.80, 19.53, 14.15. **IR** (neat):  $\nu$  = 3394, 2964, 2875, 1731, 1655, 1622, 1575, 1537, 1490, 1463, 1441, 1379, 1325, 1236, 1160, 1115, 1063, 1027, 999, 973, 941, 917, 874, 829, 804, 715, 694, 613 cm<sup>-1</sup>. **HRMS** (ESI/[M+H]<sup>+</sup>) = Calcd. for C<sub>15</sub>H<sub>22</sub>NO<sub>4</sub> m/z = 280.1549, found m/z = 280.1549.

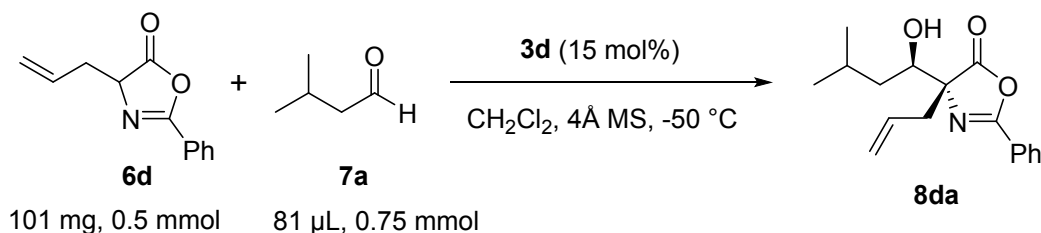

Aldol product **8da** was made from a 0.5 mmol reaction (5 d) according to the general procedure reported in the previous section. It was used directly for the following steps.

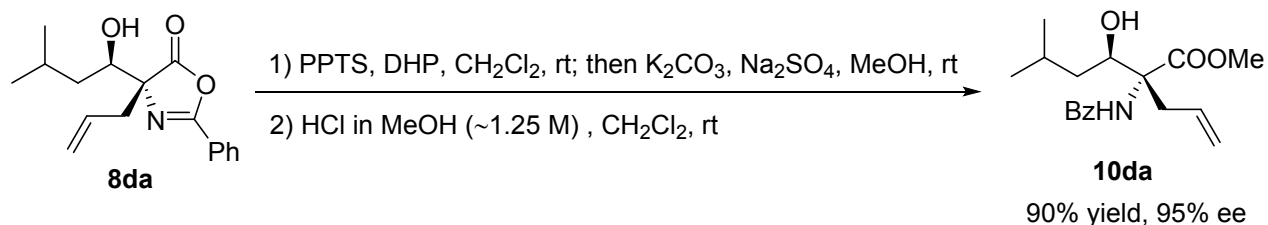

To a 22 mL vial containing Aldol product **8da** (from 0.5 mmol scale reaction) were added dihydropyran (DHP, 0.68 mL, 7.5 mmol, 15 eq), CH<sub>2</sub>Cl<sub>2</sub> (3 mL) and pyridinium *p*-toluenesulfonate (PPTS, 126 mg, 0.5 mmol, 1 eq) sequentially. The reaction mixture was

stirred at room temperature for 17.5 h. After protection with DHP was complete, anhydrous  $\text{Na}_2\text{SO}_4$  (500 mg), anhydrous MeOH (2.5 mL) and  $\text{K}_2\text{CO}_3$  (138 mg, 1 mmol, 2 eq) were added to the reaction mixture. After 18 h, the reaction mixture was passed through a short silica gel column and concentrated to remove all volatiles. Then HCl in MeOH (1 mL, ~1.25 M) and  $\text{CH}_2\text{Cl}_2$  (2 mL) were added. After stirring at room temperature for 6.5 h, the reaction was concentrated and purified by flash column chromatography (1/10 = EA/Hex) to give **10da** as a colorless oil (144 mg, 90% yield based on a 0.5 mmol Aldol reaction). All reaction times were not optimized. Racemic product was obtained according to the same procedure. Enantiomeric excess of **10da** was determined by HPLC analysis: Daicel Chiralpak AD-H, Hexanes/IPA = 90/10, 1.0 ml/min,  $\lambda = 254$  nm,  $t$  (*anti*, minor) = 8.96 min,  $t$  (*anti*, major) = 9.76 min.  $[\alpha]_{\text{D}}^{20} = +28.1$  ( $c = 0.59$ ,  $\text{CH}_2\text{Cl}_2$ ).  **$^1\text{H}$  NMR** (400 MHz,  $\text{CDCl}_3$ ):  $\delta = 7.83$  (d,  $J = 7.2$  Hz, 2H), 7.65 – 7.53 (m, 2H), 7.48 (t,  $J = 7.4$  Hz, 2H), 5.68 – 5.54 (m, 2H), 5.14 – 5.04 (m, 2H), 4.11 (t,  $J = 10.7$  Hz, 1H), 3.85 (s, 3H), 3.40 (dd,  $J = 14.3, 7.8$  Hz, 1H), 2.68 (dd,  $J = 14.4, 7.3$  Hz, 1H), 2.01 – 1.82 (m, 1H), 1.45 – 1.34 (m, 1H), 0.87 (dd,  $J = 9.7, 6.8$  Hz, 6H), 0.81 (d,  $J = 13.2$  Hz, 1H).  **$^{13}\text{C}$  NMR** (100 MHz,  $\text{CDCl}_3$ ):  $\delta = 173.44, 168.18, 133.79, 132.33, 132.12, 128.92, 127.34, 119.94, 73.46, 71.02, 53.58, 43.36, 37.06, 24.53, 23.98, 21.55$ . **IR** (neat):  $\nu = 3396, 2954, 2869, 1731, 1644, 1602, 1579, 1515, 1485, 1439, 1334, 1259, 1224, 1179, 1132, 1089, 1058, 1032, 984, 957, 922, 890, 837, 799, 739, 712, 690, 666, 623$   $\text{cm}^{-1}$ . **HRMS** (ESI/[M+H] $^+$ ) = Calcd. for  $\text{C}_{18}\text{H}_{26}\text{NO}_4$   $m/z = 320.1862$ , found  $m/z = 320.1867$ .

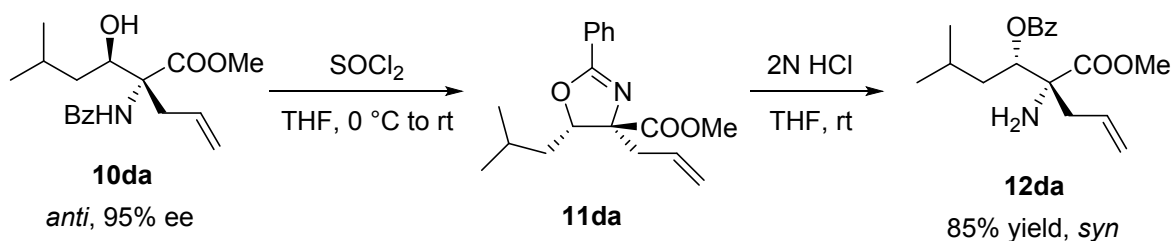

To a 22 mL vial containing product **10da** (52.8 mg, 0.165 mmol) was charged 1.5 mL anhydrous THF, followed by addition of freshly distilled thionyl chloride (120  $\mu\text{L}$ , 1.65 mmol, 10 eq). The reaction was stirred at room temperature for 24 h. Then 1 mL 2N HCl and 0.5 mL THF was added to the reaction mixture. After stirring at room temperature for 22.5 h, saturated  $\text{NaHCO}_3$  (aq) was added to quench the reaction and render the reaction mixture basic ( $\text{pH} \approx$

10), followed by extraction with Et<sub>2</sub>O (10 mL x 3). The combined organic layer was washed by brine, dried over MgSO<sub>4</sub> and concentrated. The crude was purified by flash column chromatography (1/5 = EA/Hex) to give product **12da** as a pale yellow oil (44.7 mg, 85 % yield over 2 steps). All reaction times were not optimized.  $[\alpha]_D^{20} = -23.6$  (c = 1.00, CH<sub>2</sub>Cl<sub>2</sub>). **<sup>1</sup>H NMR** (400 MHz, CDCl<sub>3</sub>): δ = 8.01 (d, *J* = 7.6 Hz, 2H), 7.57 (t, *J* = 7.4 Hz, 1H), 7.44 (t, *J* = 7.6 Hz, 2H), 5.64 (td, *J* = 16.7, 9.0 Hz, 1H), 5.54 (d, *J* = 10.5 Hz, 1H), 5.24 – 5.13 (m, 2H), 3.65 (s, 3H), 2.65 (dd, *J* = 13.3, 6.2 Hz, 1H), 2.28 (dd, *J* = 13.3, 8.5 Hz, 1H), 1.90 – 1.79 (m, 1H), 1.73 (s, 2H), 1.66 – 1.52 (m, 1H), 1.50 – 1.38 (m, 1H), 0.99 (d, *J* = 6.4 Hz, 3H), 0.92 (d, *J* = 6.6 Hz, 3H). **<sup>13</sup>C NMR** (100 MHz, CDCl<sub>3</sub>): δ = 175.62, 165.66, 133.17, 131.86, 129.94, 129.77, 128.52, 120.50, 76.59, 64.39, 52.49, 40.20, 38.34, 24.51, 24.02, 21.68. **IR** (neat): ν = 3074, 2956, 2929, 2871, 2366, 2343, 1728, 1720, 1602, 1451, 1269, 1217, 1177, 1109, 1070, 1026, 997, 925, 855, 815, 712, 667 cm<sup>-1</sup>. **HRMS** (ESI/[M+H]<sup>+</sup>) = Calcd. for C<sub>18</sub>H<sub>26</sub>NO<sub>4</sub> m/z = 320.1862, found m/z = 320.1856.

#### Determination of enantiomeric excess of product **11da**:

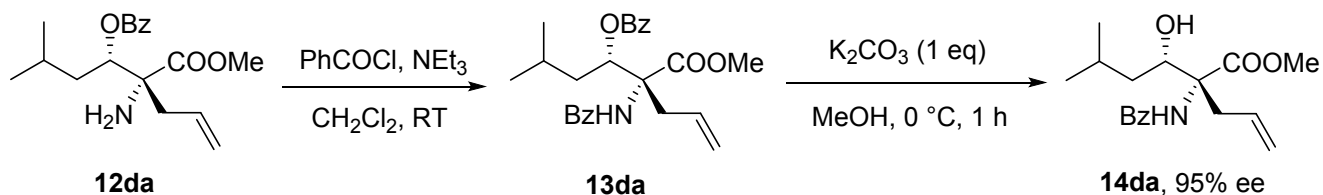

To a solution of **12da** (23.2 mg, 0.073 mmol) and benzoyl chloride (12.7 μL, 1.5 eq) in CH<sub>2</sub>Cl<sub>2</sub> (1 mL) was added triethylamine (30 μL, 3 eq). The reaction was stirred at room temperature for 17 h. Then 1N HCl was added to quench the reaction, followed by extraction with Et<sub>2</sub>O (10 mL x 3). The combine organic layer was washed with sat. NaHCO<sub>3</sub> and brine. Then it was dried over MgSO<sub>4</sub> and concentrated. The crude was purified by flash column chromatography (1/10 = EA/Hex) to give **13da** as a colorless oil (27.3 mg, 89% yield) which contained small amount of impurities. Half of this compound (13.5 mg) was dissolved in MeOH (1 mL) and cooled in an ice-bath with stirring. Then K<sub>2</sub>CO<sub>3</sub> (6.6 mg) was added in one portion to the reaction. After stirring at 0 C for 1 h, the reaction was diluted by water and extracted with Et<sub>2</sub>O (5 mL x 3). The combined organic layer was washed with brine, dried over MgSO<sub>4</sub> and concentrated. The

crude was purified by preparative thin-layer chromatography to give **14da** as a pale white solid (8.4 mg, 83% yield, 95% ee). Enantiomeric excess of **14da** was determined by HPLC analysis: Daicel Chiralpak AD-H, Hexanes/IPA = 90/10, 1.0 ml/min,  $\lambda = 254$  nm,  $t$  (*anti*, minor) = 7.79 min,  $t$  (*anti*, major) = 12.99 min.  $[\alpha]_{\text{D}}^{20} = -148.1$  ( $c = 0.15$ ,  $\text{CH}_2\text{Cl}_2$ ).  **$^1\text{H NMR}$**  (400 MHz,  $\text{CDCl}_3$ ):  $\delta = 7.78$  (d,  $J = 7.7$  Hz, 2H), 7.54 (t,  $J = 7.2$  Hz, 1H), 7.46 (t,  $J = 7.4$  Hz, 2H), 6.71 (s, 1H), 5.69 (dt,  $J = 15.3, 9.5$  Hz, 1H), 5.39 – 5.23 (m, 2H), 4.76 (d,  $J = 11.0$  Hz, 1H), 4.13 (t,  $J = 10.6$  Hz, 1H), 3.83 (s, 3H), 2.95 (dd,  $J = 13.7, 4.8$  Hz, 1H), 2.71 (dd,  $J = 13.7, 9.8$  Hz, 1H), 2.03 – 1.87 (m, 1H), 1.44 – 1.32 (m, 1H), 1.32 – 1.20 (m, 2H), 0.93 (t,  $J = 7.0$  Hz, 6H).  **$^{13}\text{C NMR}$**  (100 MHz,  $\text{CDCl}_3$ ):  $\delta = 171.96, 168.23, 134.41, 132.48, 132.05, 128.83, 127.15, 121.01, 73.38, 69.01, 53.02, 41.62, 38.84, 24.72, 24.09, 21.59$ . **IR** (neat):  $\nu = 3460, 3389, 2954, 2865, 1730, 1637, 1603, 1579, 1517, 1481, 1435, 1413, 1330, 1292, 1258, 1231, 1176, 1137, 1092, 1055, 1030, 988, 960, 919, 887, 871, 846, 803, 773, 707, 687, 626$   $\text{cm}^{-1}$ . **HRMS** (ESI/[ $\text{M}+\text{H}$ ] $^+$ ) = Calcd. for  $\text{C}_{18}\text{H}_{26}\text{NO}_4$   $m/z = 320.1862$ , found  $m/z = 320.1862$ .

## 5. Determination of relative configurations

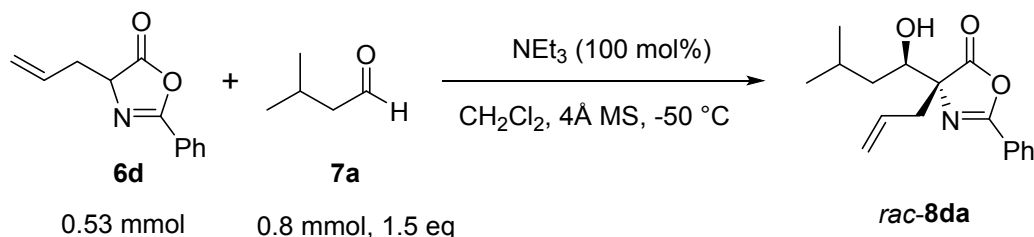

Aldol product *rac*-**8da** was made from a 0.53 mmol reaction (4 d) according to the general procedure reported in the previous section. It was used directly for the following steps.

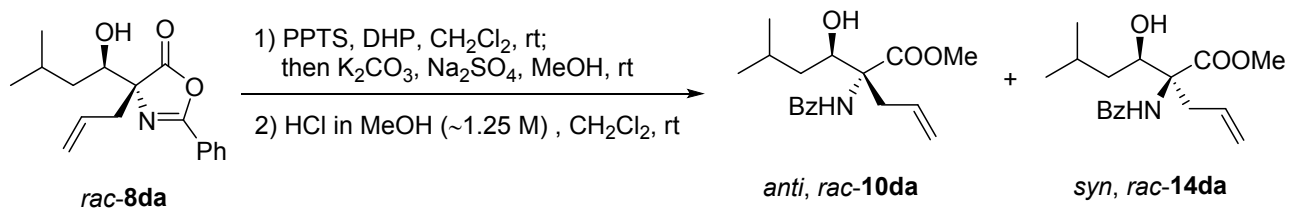



The reaction was carried out by following the same procedure used for compound **10da**, giving *rac-10da* as a colorless oil (90.6 mg, 53% yield) and *rac-14da* as a pale yellow solid (64.5 mg, 38% yield). All spectroscopic data were the same as those of **10da** and **14da**.

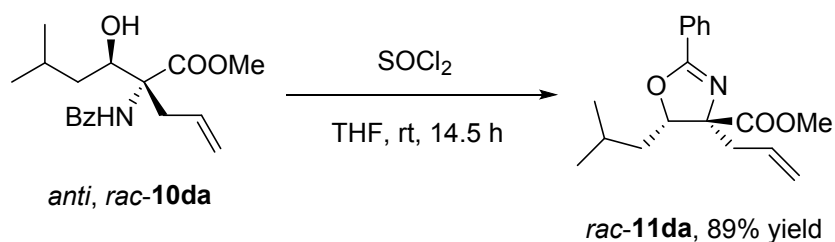

To a solution of *rac-10da* (30.7 mg, 0.096 mmol) in 1 mL anhydrous THF was added freshly distilled thionyl chloride (35  $\mu\text{L}$ , 0.48 mmol, 5 eq) at room temperature. The reaction was stirred at room temperature for 14.5 h. Then saturated  $\text{NaHCO}_3$  (aq) was added to quench the reaction and render the reaction mixture basic (pH  $\approx$  10), followed by extraction with  $\text{Et}_2\text{O}$  (10 mL  $\times$  3). The combined organic layer was washed by brine, dried over  $\text{MgSO}_4$  and concentrated. The crude was purified by flash column chromatography (1/5 = EA/Hex) to give product *rac-11da* as a brown oil (25.9 mg, 89% yield).  **$^1\text{H NMR}$**  (400 MHz,  $\text{CDCl}_3$ ):  $\delta$  = 8.02 – 7.97 (m, 2H), 7.52 – 7.45 (m, 1H), 7.44 – 7.36 (m, 2H), 5.97 – 5.81 (m, 1H), 5.18 – 5.08 (m, 2H), 4.82 (dd,  $J$  = 10.9, 2.6 Hz, 1H), 3.78 (s, 3H), 2.65 (dd,  $J$  = 13.9, 7.6 Hz, 1H), 2.52 (dd,  $J$  = 13.9, 6.5 Hz, 1H), 2.03 – 1.87 (m, 1H), 1.78 (ddd,  $J$  = 14.1, 10.9, 5.2 Hz, 1H), 1.61 (ddd,  $J$  = 14.0, 8.5, 2.7 Hz, 1H), 1.04 (dd,  $J$  = 6.6, 4.2 Hz, 6H).  **$^{13}\text{C NMR}$**  (100 MHz,  $\text{CDCl}_3$ ):  $\delta$  = 173.80, 164.23, 132.96, 131.80, 128.67, 128.35, 127.59, 118.85, 83.68, 79.08, 52.65, 38.55, 38.31, 26.08, 23.59, 21.89. **IR** (neat):  $\nu$  = 3073, 2956, 2877, 2341, 1963, 1911, 1730, 1643, 1580, 1495, 1450, 1444, 1354, 1322, 1250, 1228, 1136, 1086, 1069, 1026, 975, 919, 836, 780, 697  $\text{cm}^{-1}$ . **HRMS** (ESI/[ $\text{M}+\text{H}$ ] $^+$ ) = Calcd. for  $\text{C}_{18}\text{H}_{26}\text{NO}_4$   $m/z$  = 302.1756, found  $m/z$  = 302.1763.

Relative configuration of *rac-11da* was determined by 1D NOESY experiment. Therefore, relative configuration of *rac-10da* was determined to be *anti*. Relative configurations of all the other products were assigned based on these results.

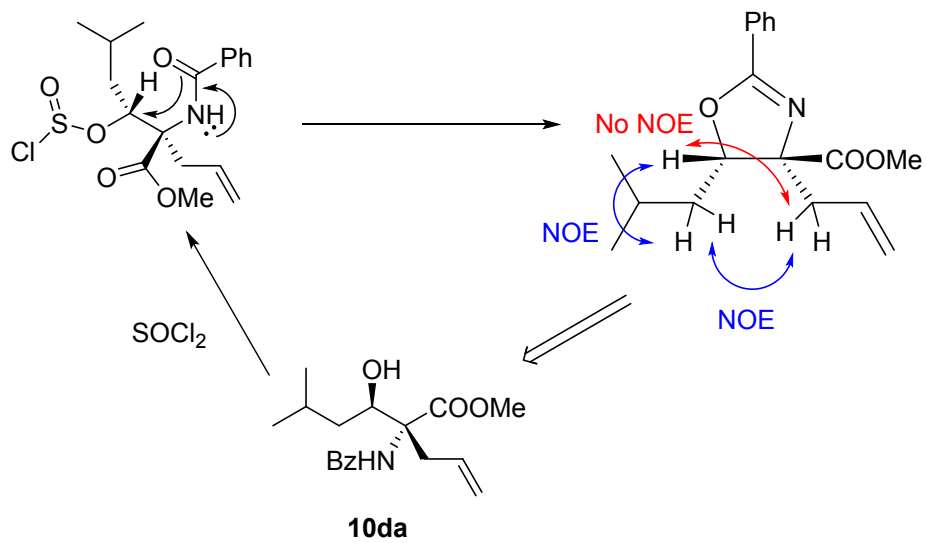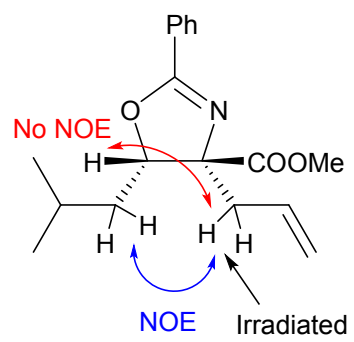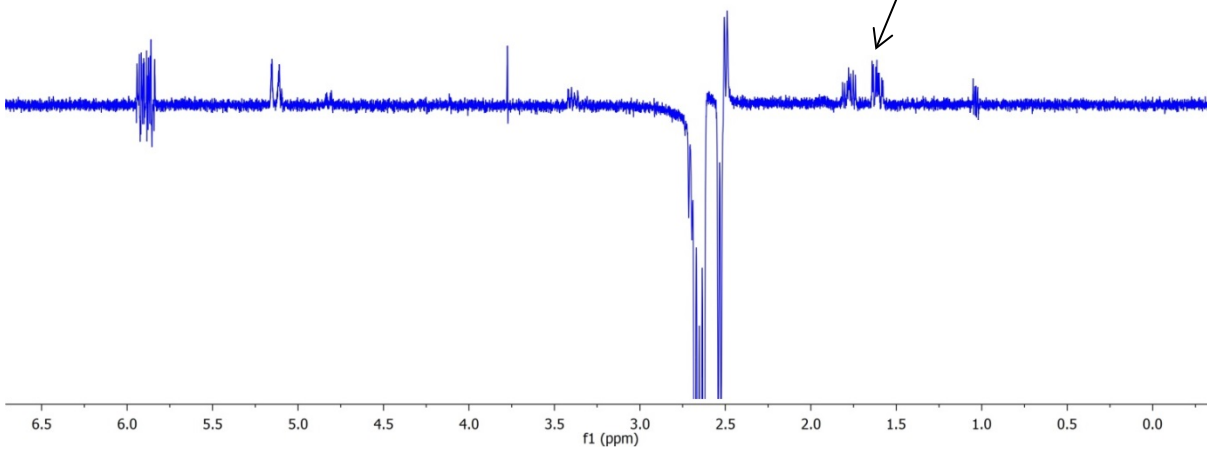

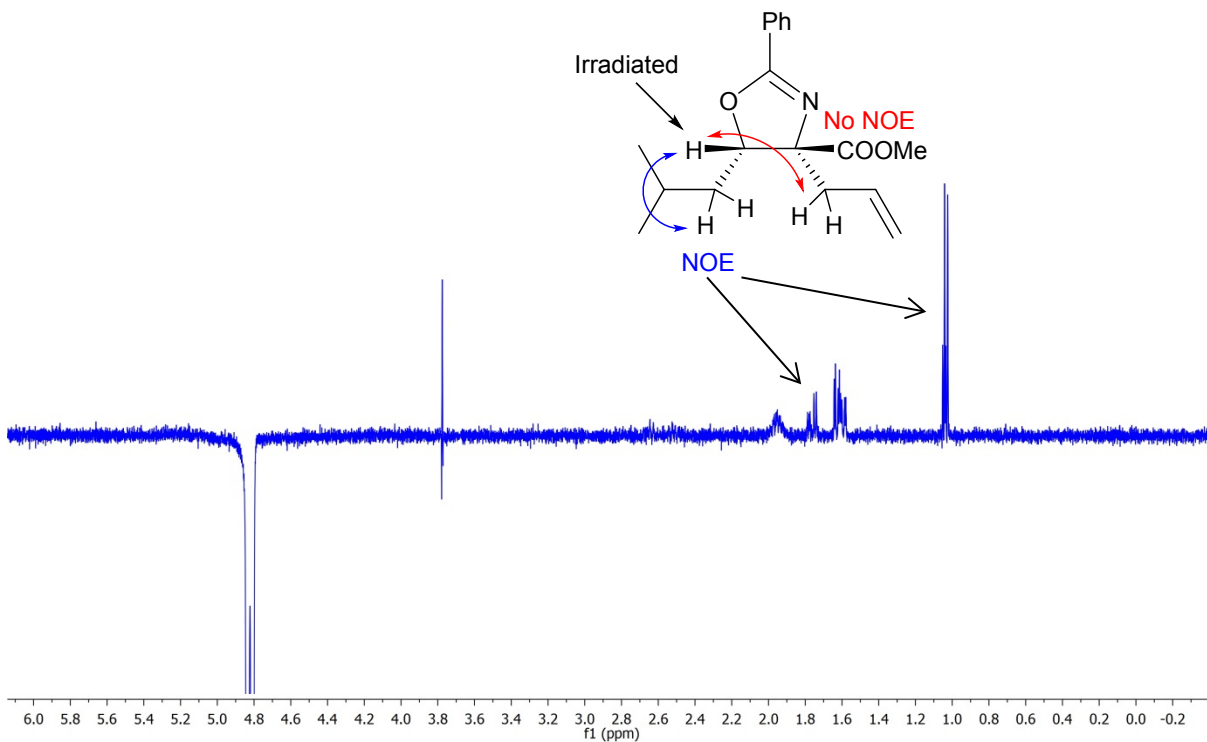

## 6. Determination of absolute configurations

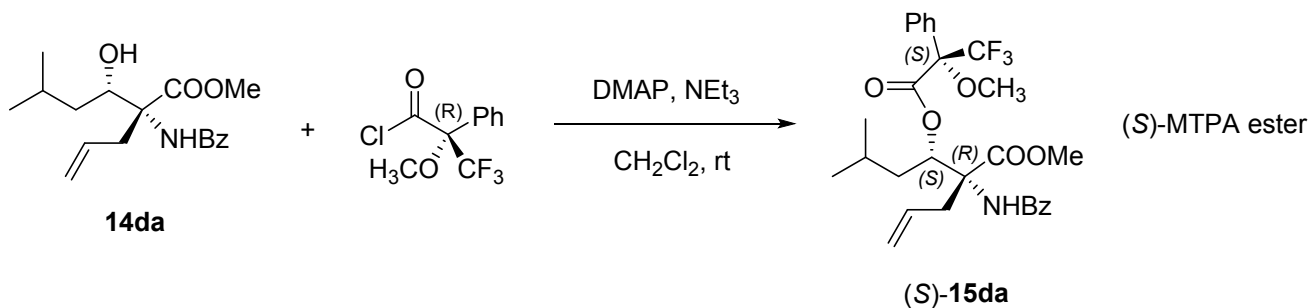

To a solution of **14da** (4.2 mg, 0.013 mmol) in  $\text{CH}_2\text{Cl}_2$  (0.5 mL) were added (*R*)-(-)- $\alpha$ -Methoxy- $\alpha$ -(trifluoromethyl)phenylacetyl chloride ((*R*)-(-)-MTPA-Cl, Mosher's acid chloride, 4 mg, 0.0156 mmol, 1.2 equiv), triethylamine (18  $\mu\text{L}$ , 0.13 mmol, 10 equiv) and 4-dimethylaminopyridine (DMAP, 3.2 mg, 0.026 mmol, 2 equiv) sequentially at room temperature. After stirring for 14 h, the reaction mixture was concentrated and purified by preparative thin-

layer chromatography (1/5 = EA/Hex) to give (*S*)-**14da** as a colorless oil (4.6 mg, 66% yield). **<sup>1</sup>H NMR** (400 MHz, CDCl<sub>3</sub>): δ = 7.72 (d, *J* = 7.7 Hz, 2H), 7.58 (d, *J* = 7.1 Hz, 2H), 7.52 (t, *J* = 7.3 Hz, 1H), 7.48 – 7.33 (m, 5H), 7.03 (s, 1H), 6.09 (d, *J* = 8.9 Hz, 1H), 5.57 (td, *J* = 17.3, 7.8 Hz, 1H), 5.10 – 4.95 (m, 2H), 3.77 (s, 3H), 3.54 (s, 3H), 3.47 (dd, *J* = 13.8, 7.0 Hz, 1H), 2.55 (dd, *J* = 13.7, 7.6 Hz, 1H), 1.66 – 1.53 (m, 2H), 1.53 – 1.45 (m, 1H), 0.90 (d, *J* = 6.3 Hz, 3H), 0.85 (d, *J* = 6.5 Hz, 3H). **HRMS** (ESI/[M+H]<sup>+</sup>) = Calcd. for C<sub>18</sub>H<sub>26</sub>NO<sub>4</sub> m/z = 536.2260, found m/z = 536.2265.

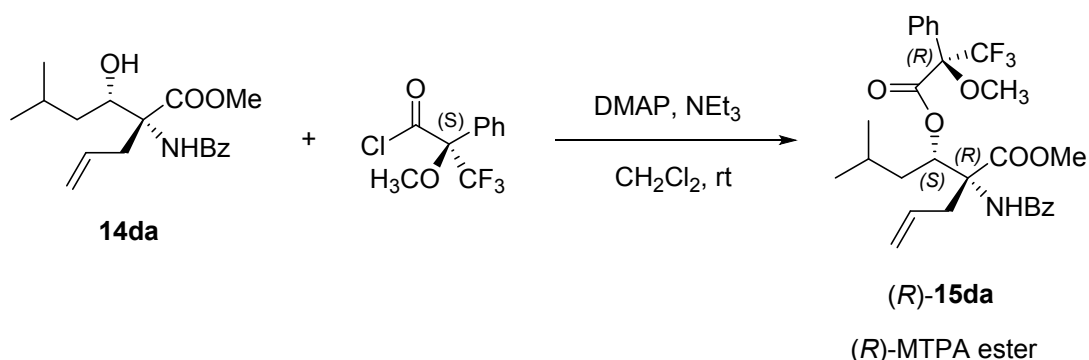

By following the same procedure, product (*R*)-**15da** was synthesized from (*S*)-(-)-MTPA-Cl and obtained as a colorless oil (4.5 mg, 65% yield). **<sup>1</sup>H NMR** (400 MHz, CDCl<sub>3</sub>): δ = 7.72 (d, *J* = 7.7 Hz, 2H), 7.58 (d, *J* = 7.1 Hz, 2H), 7.52 (t, *J* = 7.3 Hz, 1H), 7.48 – 7.33 (m, 5H), 7.03 (s, 1H), 6.09 (d, *J* = 8.9 Hz, 1H), 5.57 (td, *J* = 17.3, 7.8 Hz, 1H), 5.10 – 4.95 (m, 2H), 3.77 (s, 3H), 3.54 (s, 3H), 3.47 (dd, *J* = 13.8, 7.0 Hz, 1H), 2.55 (dd, *J* = 13.7, 7.6 Hz, 1H), 1.66 – 1.53 (m, 2H), 1.53 – 1.45 (m, 1H), 0.90 (d, *J* = 6.3 Hz, 3H), 0.85 (d, *J* = 6.5 Hz, 3H). **HRMS** (ESI/[M+H]<sup>+</sup>) = Calcd. for C<sub>18</sub>H<sub>26</sub>NO<sub>4</sub> m/z = 536.2260, found m/z = 536.2267.

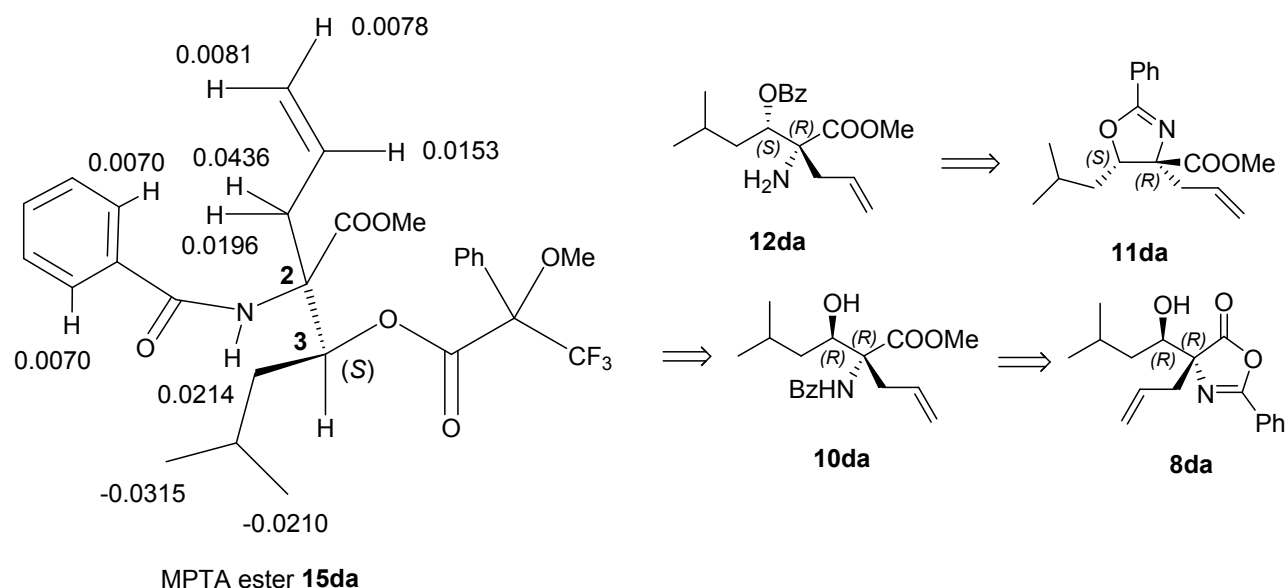

By employing the modified Mosher's method<sup>15-17</sup>, the absolute configuration at the C3 position of **15da** was determined to be *S* on the basis of the  $\Delta\delta$  values ( $\delta_{(S)\text{-MPTA}} - \delta_{(R)\text{-MPTA}}$  in ppm). Based on the relative stereochemistry, the absolute configuration at the C2 position of **15da** was determined to be *R*. Therefore, the absolute configurations of **12da**, **11da**, **10da** and **8da** were all assigned. Absolute configurations of all the other products were assigned based on these results.

## 7. Reference:

- 1) Weber, M.; Frey, W.; Peters, R. *Angew. Chem. Int. Ed.* **2013**, *52*, 13223-13227.
- 2) Zhu, R.; Buchwald, S. L. *J. Am. Chem. Soc.* **2012**, *134*, 12462-12465.
- 3) Metrano, A. J., Miller, S. J. *J. Org. Chem.* **2014**, *79*, 1542-1554.
- 4) Witkowska, R.; Kaczmarek, K.; Crisma, M.; Toniolo, C.; Zabrocki *J. Peptide Sci.* **2001**, *7*, 619-625.
- 5) Yang, C.-T.; Chandrasekharan, P.; He, T.; Poh, Z.; Raju, A.; Chuang, K.-H.; Robins, E. *G. Biomaterials* **2014**, *35*, 327-336.
- 6) Chen, F. M. F.; Kuroda, K.; Benoiton, N. L. *Synthesis* **1979**, 230-232.
- 7) Melhado, A. D.; Luparia, M.; Toste, F. D. *J. Am. Chem. Soc.* **2007**, *129*, 12638-12639.
- 8) Finkbeiner, P.; Weckenmann, N. M.; Nachtsheim, B. *J. Org. Lett.* **2014**, *16*, 1326-1329.

- 9) Li, H.; Wang, Y.; Tang, L.; Deng, L. *J. Am. Chem. Soc.* **2004**, *126*, 9906-9907.
- 10) Wu, F.; Hong, R.; Khan, J.; Liu, X.; Deng, L. *Angew. Chem. Int. Ed.* **2006**, *45*, 4301-4305.
- 11) Li, H.; Wang, B. *J. Am. Chem. Soc.* **2006**, *128*, 732-733.
- 12) Wang, Y.; Li, H.; Wang, Y.-Q.; Liu, Y.; Foxman, B. M. *J. Am. Chem. Soc.* **2007**, *129*, 6364-6365.
- 13) Bartelson, K. J.; Singh, R. P.; Foxman, B. M.; Deng, L. *Chem. Sci.* **2011**, *2*, 1940-1944.
- 14) Vakulya, B.; Varga, S.; Csámpai, A.; Soós, T. *Org. Lett.* **2005**, *7*, 1967-1969.
- 15) Ohtani, I.; Kusumi, T.; Kashman, Y.; Kakisawa, H. *J. Am. Chem. Soc.* **1991**, *113*, 4092-4096.
- 16) Fujita, T.; Hamamichi, N.; Kiuchi, M.; Matsuzaki, T.; Kitao, Y.; Inoue, K.; Hirose, R.; Yoneta, M.; Sasaki, S.; Chiba, K. *J. Antibiot.* **1996**, *49*, 846-53.
- 17) Terada, M.; Tanaka, H.; Sorimachi, K. *J. Am. Chem. Soc.* **2009**, *131*, 3430-3431.

## **8. <sup>1</sup>H and <sup>13</sup>C NMR Spectra for New Compounds, HPLC Spectra for chiral products**

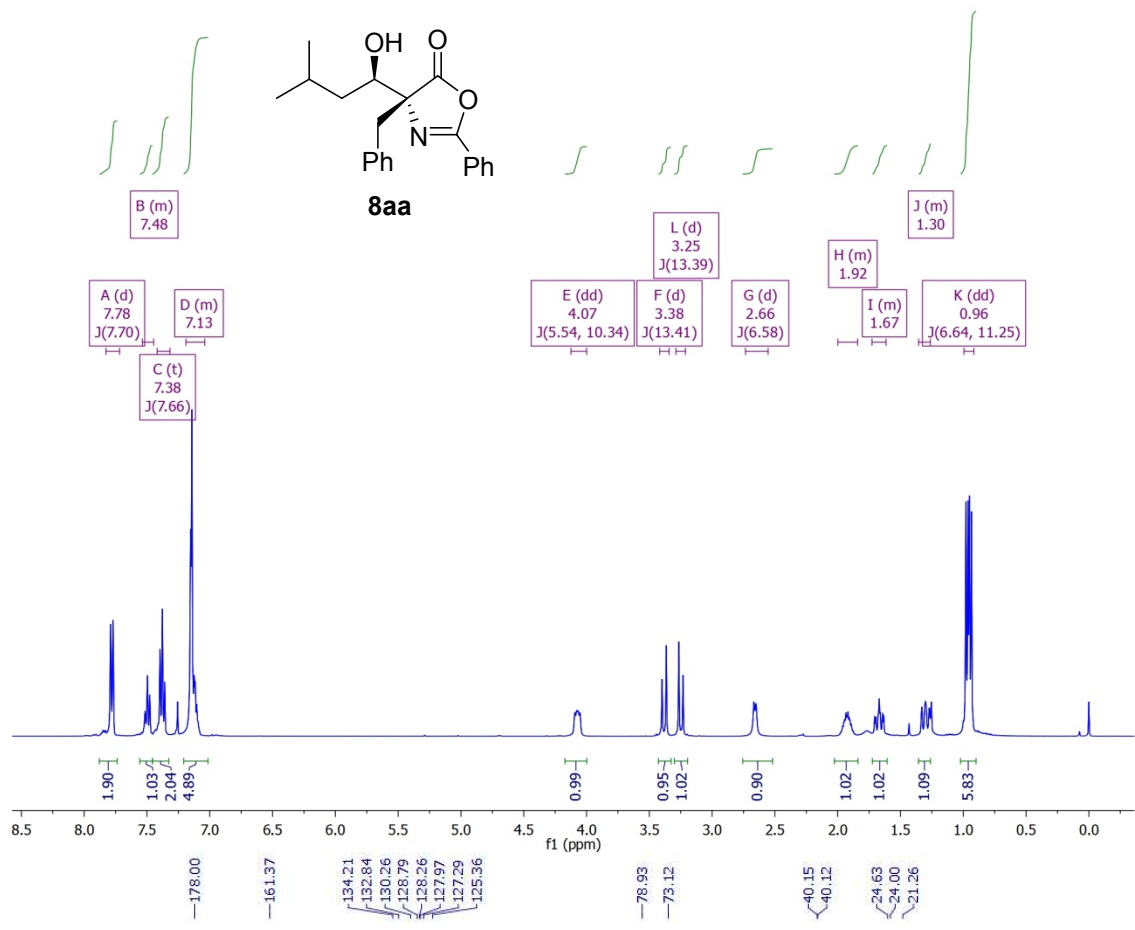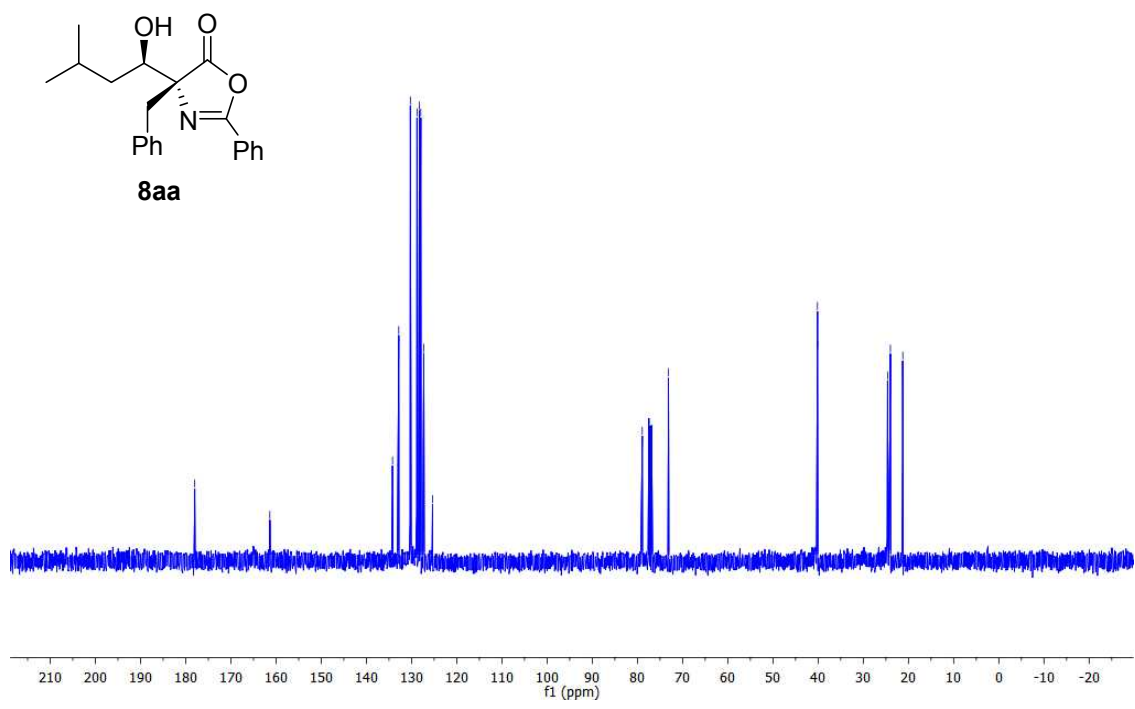

Data File C:\CHEM32\1\DATA\YZHENG\3-63RAC\_1.D  
Sample Name: 3-63rac

=====  
Acq. Operator : yang  
Acq. Instrument : Instrument 1 Location : -  
Injection Date : 8/1/2011 2:32:52 PM  
Acq. Method : C:\CHEM32\1\METHODS\METHOD-1\_LC.M  
Last changed : 8/1/2011 2:00:23 PM by yang  
(modified after loading)  
Analysis Method : C:\CHEM32\1\METHODS\METHOD-1\_LC.M  
Last changed : 8/1/2011 5:37:18 PM by yang  
(modified after loading)  
Sample Info : AS-H, Hex:IPA = 95:5, 1.0 mL/min, 254 nm, 44 bar, Right

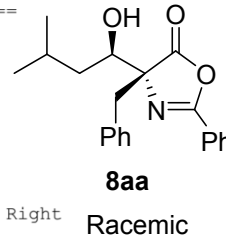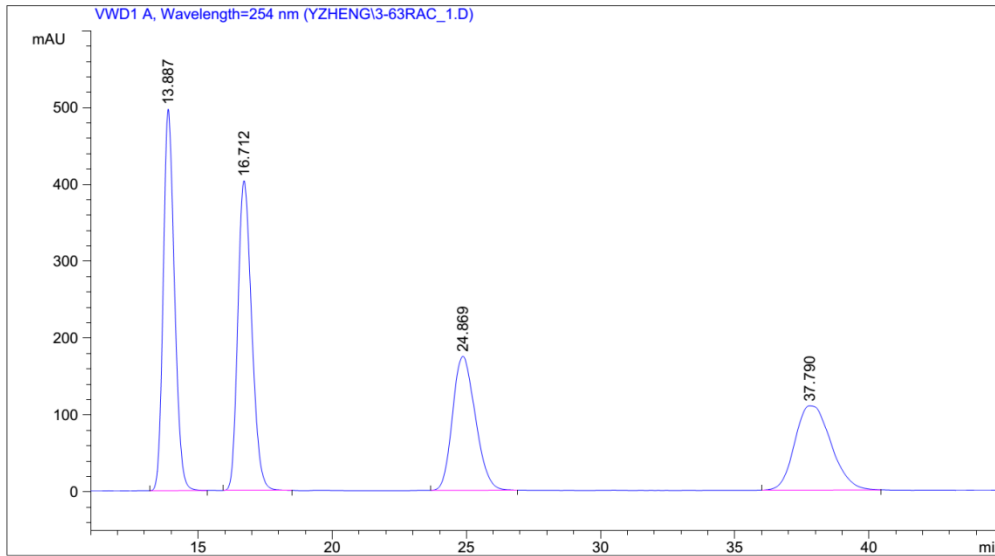

=====  
Area Percent Report  
=====

Sorted By : Signal  
Multiplier : 1.0000  
Dilution : 1.0000  
Use Multiplier & Dilution Factor with ISTDs

Signal 1: VWD1 A, Wavelength=254 nm

| Peak # | RetTime [min] | Type | Width [min] | Area mAU  | Height [mAU] | Area %  |
|--------|---------------|------|-------------|-----------|--------------|---------|
| 1      | 13.887        | BB   | 0.4461      | 1.44565e4 | 496.35040    | 29.2101 |
| 2      | 16.712        | BB   | 0.5614      | 1.44665e4 | 403.04199    | 29.2304 |
| 3      | 24.869        | BB   | 0.9422      | 1.02947e4 | 174.34625    | 20.8009 |
| 4      | 37.790        | BB   | 1.4103      | 1.02737e4 | 109.66785    | 20.7586 |

Totals : 4.94914e4 1183.40650

=====  
\*\*\* End of Report \*\*\*



Data File C:\CHEM32\1\DATA\YZHENG\3-62.D  
Sample Name: 3-62

=====  
Acq. Operator : yang  
Acq. Instrument : Instrument 1 Location : -  
Injection Date : 8/1/2011 4:17:13 PM  
Acq. Method : C:\CHEM32\1\METHODS\METHOD-1\_LC.M  
Last changed : 8/1/2011 3:55:52 PM by yang  
(modified after loading)  
Analysis Method : C:\CHEM32\1\METHODS\WASH.M  
Last changed : 8/10/2011 11:12:50 AM by jhl  
(modified after loading)  
Sample Info : AS-H, Hex:IPA = 95:5, 1.0 mL/min, 254 nm, 44 bar, Right

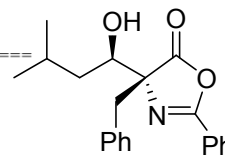

**8aa**

94% ee, anti/syn = 97.5/2.5

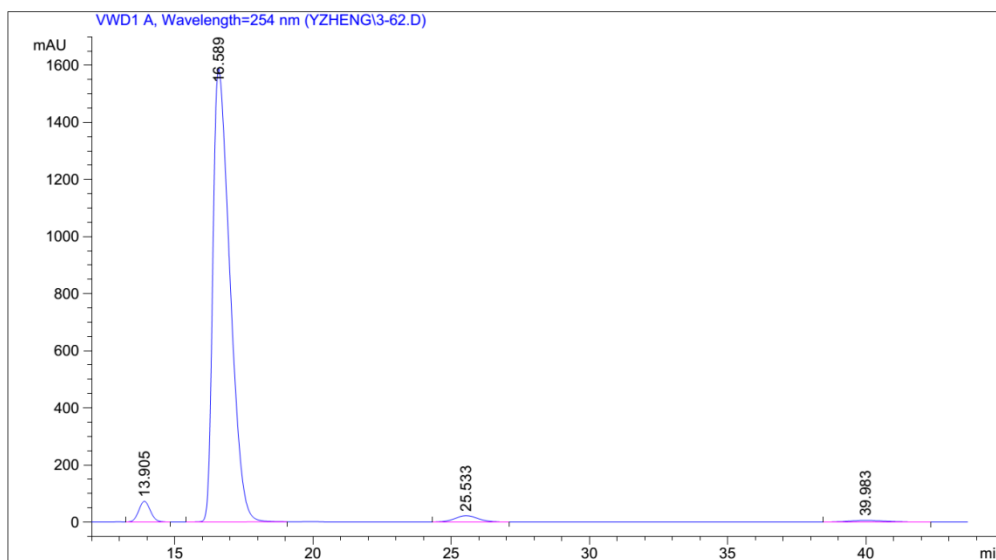

=====  
Area Percent Report  
=====

Sorted By : Signal  
Multiplier : 1.0000  
Dilution : 1.0000  
Use Multiplier & Dilution Factor with ISTDs

Signal 1: VWD1 A, Wavelength=254 nm

| Peak # | RetTime [min] | Type | Width [min] | Area mAU *s | Height [mAU] | Area %  |
|--------|---------------|------|-------------|-------------|--------------|---------|
| 1      | 13.905        | VB   | 0.4595      | 2129.86011  | 72.44035     | 2.9648  |
| 2      | 16.589        | BB   | 0.6545      | 6.78960e4   | 1588.21118   | 94.5130 |
| 3      | 25.533        | BB   | 0.8975      | 1288.76758  | 21.95257     | 1.7940  |
| 4      | 39.983        | BB   | 1.1716      | 523.13538   | 5.65183      | 0.7282  |

Totals : 7.18378e4 1688.25594

=====  
\*\*\* End of Report \*\*\*

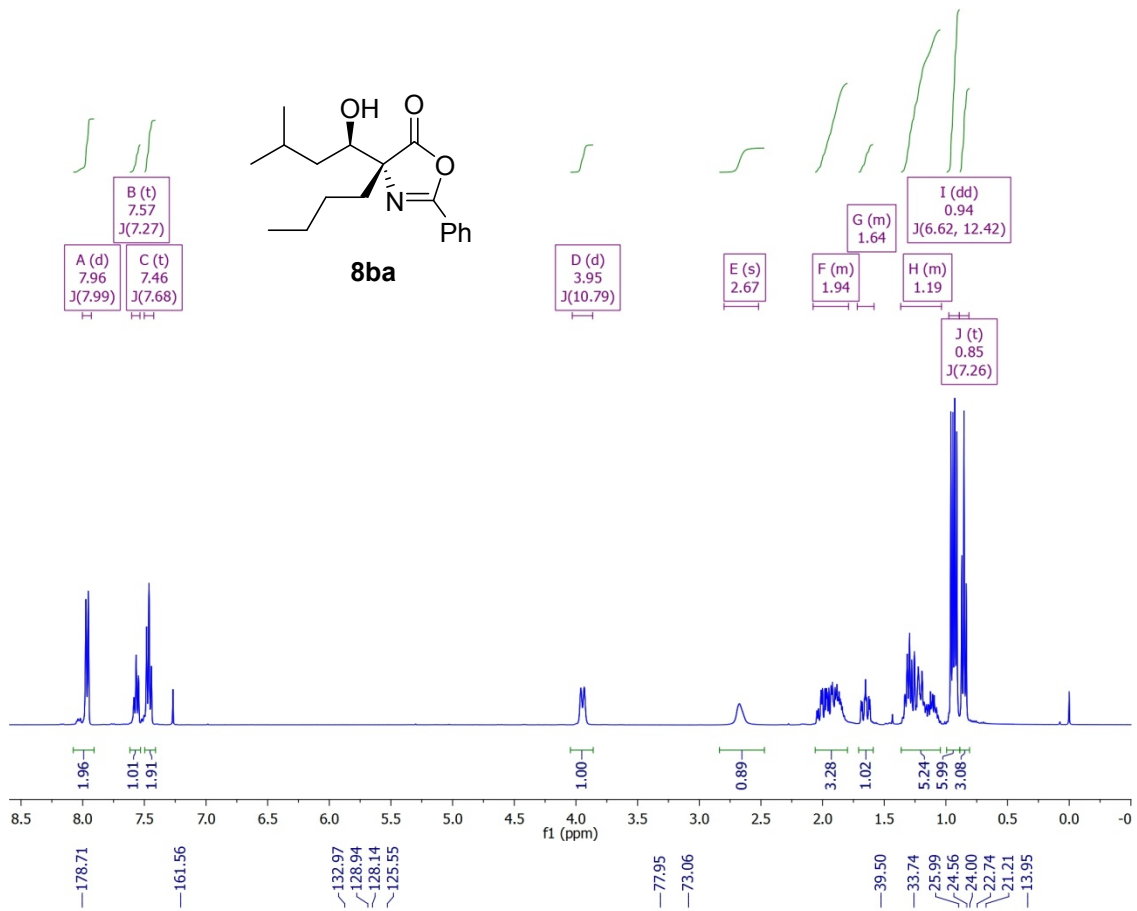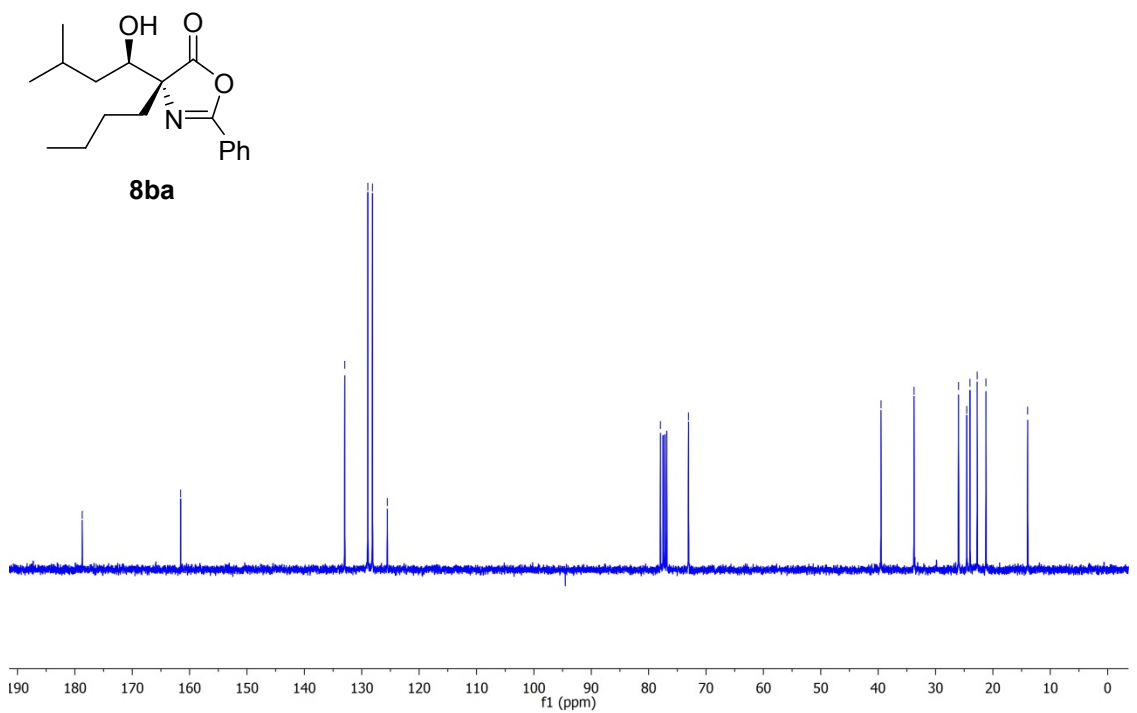

Data File C:\CHEM32\1\DATA\YZHENG\3-63RAC\_1.D  
Sample Name: 3-63rac

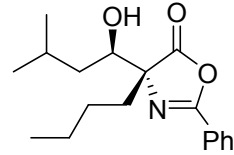

**8ba**

Racemic

=====  
Acq. Operator : yang  
Acq. Instrument : Instrument 1 Location : -  
Injection Date : 8/1/2011 2:32:52 PM  
Acq. Method : C:\CHEM32\1\METHODS\METHOD-1\_LC.M  
Last changed : 8/1/2011 2:00:23 PM by yang  
(modified after loading)  
Analysis Method : C:\CHEM32\1\METHODS\METHOD-1\_LC.M  
Last changed : 8/1/2011 5:37:18 PM by yang  
(modified after loading)  
Sample Info : AS-H, Hex:IPA = 95:5, 1.0 mL/min, 254 nm, 44 bar, Right



=====  
Area Percent Report  
=====

Sorted By : Signal  
Multiplier : 1.0000  
Dilution : 1.0000  
Use Multiplier & Dilution Factor with ISTDs

Signal 1: VWD1 A, Wavelength=254 nm

| Peak # | RetTime [min] | Type | Width [min] | Area mAU  | Height [mAU] | Area %  |
|--------|---------------|------|-------------|-----------|--------------|---------|
| 1      | 13.887        | BB   | 0.4461      | 1.44565e4 | 496.35040    | 29.2101 |
| 2      | 16.712        | BB   | 0.5614      | 1.44665e4 | 403.04199    | 29.2304 |
| 3      | 24.869        | BB   | 0.9422      | 1.02947e4 | 174.34625    | 20.8009 |
| 4      | 37.790        | BB   | 1.4103      | 1.02737e4 | 109.66785    | 20.7586 |

Totals : 4.94914e4 1183.40650

=====  
\*\*\* End of Report \*\*\*

Data File C:\CHEM32\1\DATA\YZHENG\3-62.D  
Sample Name: 3-62

```
=====
Acq. Operator   : yang
Acq. Instrument : Instrument 1           Location : -
Injection Date  : 8/1/2011 4:17:13 PM
Acq. Method     : C:\CHEM32\1\METHODS\METHOD-1_LC.M
Last changed    : 8/1/2011 3:55:52 PM by yang
                  (modified after loading)
Analysis Method : C:\CHEM32\1\METHODS\WASH.M
Last changed    : 8/10/2011 11:12:50 AM by jhl
                  (modified after loading)
Sample Info     : AS-H, Hex:IPA = 95:5, 1.0 mL/min, 254 nm, 44 bar, Right
```

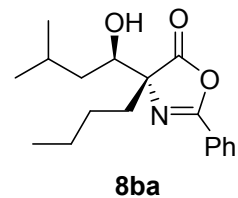

95% ee, *anti/syn* = 98/2

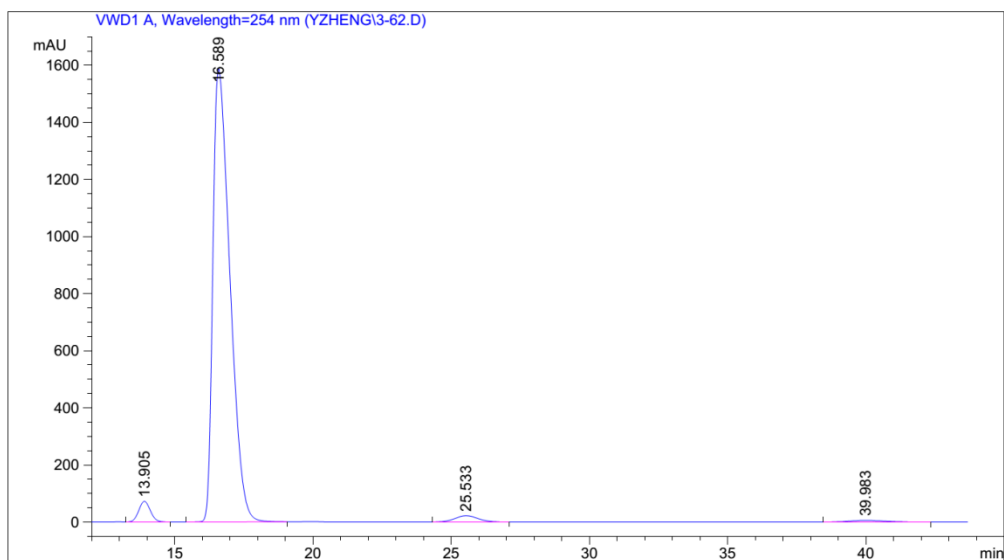

=====  
Area Percent Report  
=====

Sorted By : Signal  
Multiplier : 1.0000  
Dilution : 1.0000  
Use Multiplier & Dilution Factor with ISTDs

Signal 1: VWD1 A, Wavelength=254 nm

| Peak # | RetTime [min] | Type | Width [min] | Area mAU   | Area *s    | Height [mAU] | Area % |
|--------|---------------|------|-------------|------------|------------|--------------|--------|
| 1      | 13.905        | VB   | 0.4595      | 2129.86011 | 72.44035   | 2.9648       |        |
| 2      | 16.589        | BB   | 0.6545      | 6.78960e4  | 1588.21118 | 94.5130      |        |
| 3      | 25.533        | BB   | 0.8975      | 1288.76758 | 21.95257   | 1.7940       |        |
| 4      | 39.983        | BB   | 1.1716      | 523.13538  | 5.65183    | 0.7282       |        |

Totals : 7.18378e4 1688.25594

=====  
\*\*\* End of Report \*\*\*

Data File C:\CHEM32\1\DATA\YZHENG\3-91.D  
Sample Name: 3-91

```
=====
Acq. Operator   : yang
Acq. Instrument : Instrument 1
Injection Date  : 9/12/2011 5:33:19 PM
Location        : Vial 51
Inj Volume     : 5 µl

Acq. Method    : C:\CHEM32\1\METHODS\YANG.M
Last changed   : 9/12/2011 5:13:01 PM by yang
                (modified after loading)
Analysis Method: C:\CHEM32\1\METHODS\METHOD1.M
Last changed   : 9/12/2011 6:07:44 PM by xiao
                (modified after loading)
Sample Info    : AD-H+AD, Hex:IPA = 95:5, 0.8 mL/min, 254 nm, 47 bar, Le
                ft,
=====
```

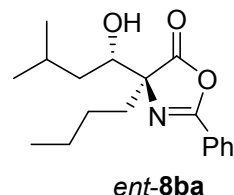

-90% ee, anti/syn = 97.5/2.5

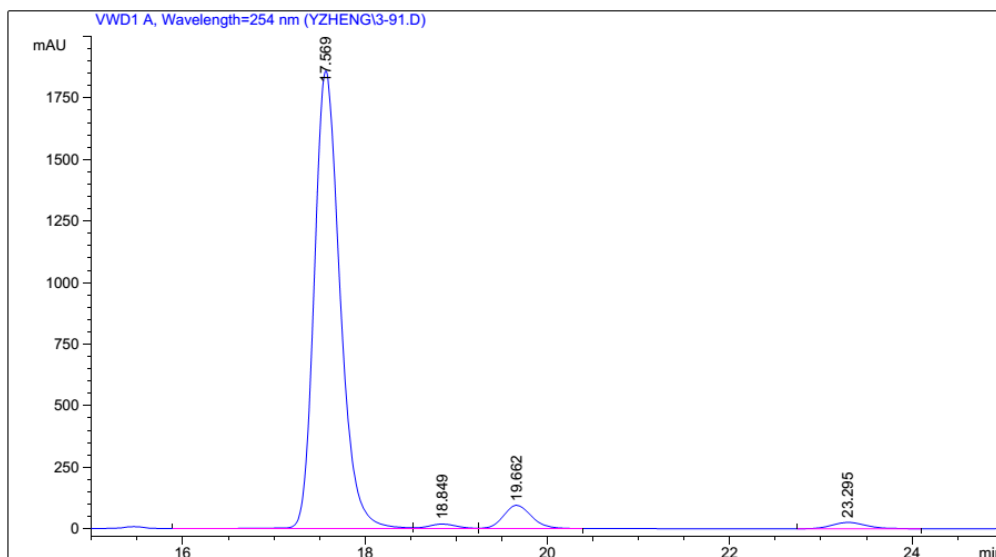

=====  
Area Percent Report  
=====

```
Sorted By      : Signal
Multiplier     : 1.0000
Dilution       : 1.0000
Sample Amount  : 1.00000 [ng/ul] (not used in calc.)
Use Multiplier & Dilution Factor with ISTDs
```

Signal 1: VWD1 A, Wavelength=254 nm

| Peak # | RetTime [min] | Type | Width [min] | Area mAU   | Height [mAU] | Area %  |
|--------|---------------|------|-------------|------------|--------------|---------|
| 1      | 17.569        | VV   | 0.3010      | 3.63684e4  | 1859.21899   | 92.2223 |
| 2      | 18.849        | VV   | 0.3221      | 391.98923  | 18.67219     | 0.9940  |
| 3      | 19.662        | VB   | 0.3268      | 2006.05396 | 94.84164     | 5.0869  |
| 4      | 23.295        | BB   | 0.4001      | 669.13727  | 25.92393     | 1.6968  |

Totals : 3.94355e4 1998.65674

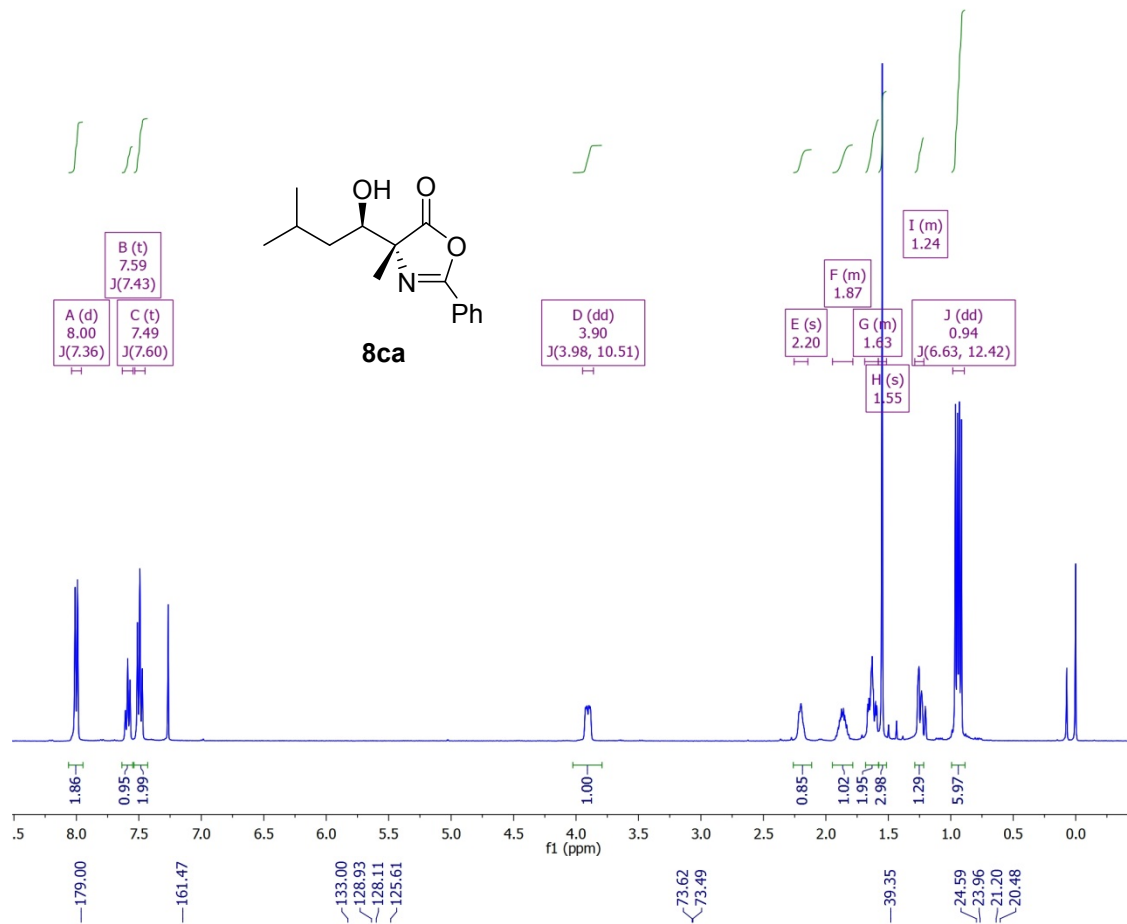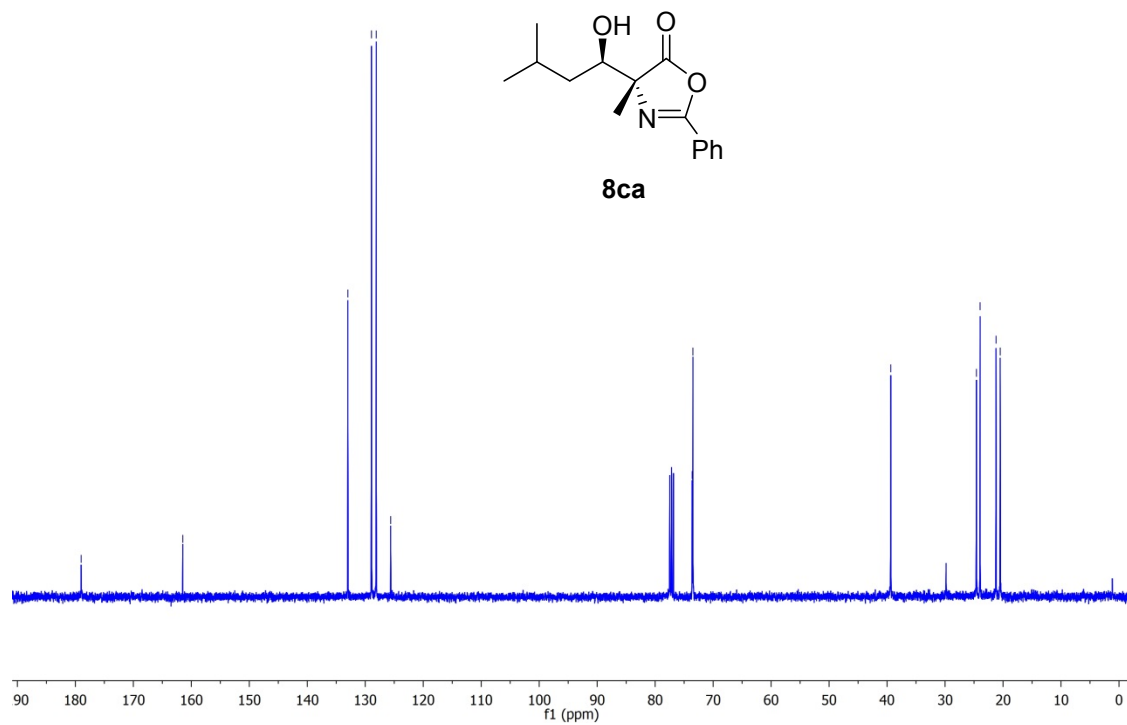

Data File C:\CHEM32\1\DATA\YZHENG\3-78RAC\_1.D  
Sample Name: 3-78rac

```
=====
Acq. Operator   : yang
Acq. Instrument : Instrument 1
Injection Date  : 8/15/2011 10:48:35 PM
Location       : Vial 61
Inj Volume     : 5 µl

Acq. Method    : C:\CHEM32\1\METHODS\METHOD1.M
Last changed   : 8/15/2011 10:29:10 PM by yang
                (modified after loading)
Analysis Method: C:\CHEM32\1\METHODS\METHOD1.M
Last changed   : 8/30/2011 2:14:12 PM by xiao
                (modified after loading)
Sample Info    : AD-H, Hex:IPA = 99:1, mL/min, 254 nm, 45 bar, Left
=====
```

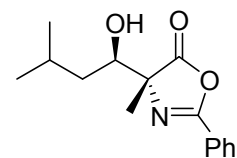

**8ca**  
Racemic

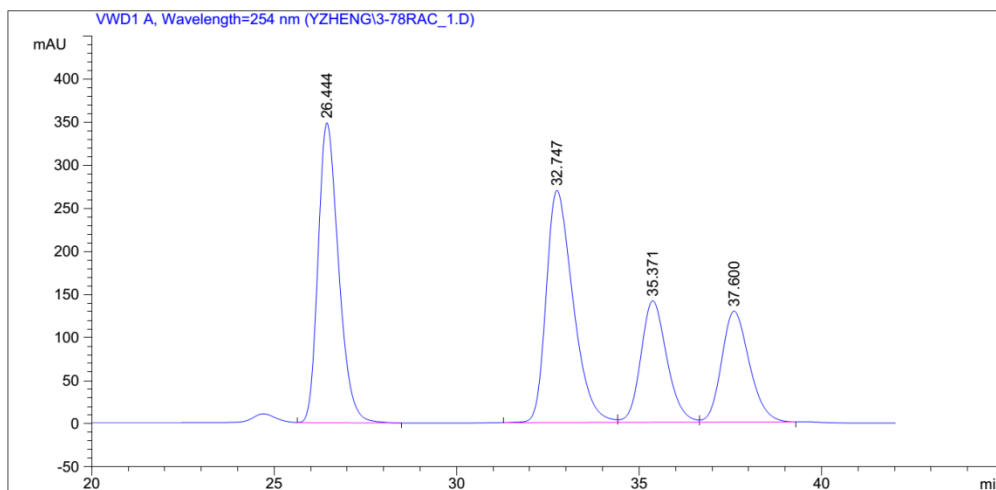

=====  
Area Percent Report  
=====

```
Sorted By      : Signal
Multiplier     : 1.0000
Dilution       : 1.0000
Sample Amount  : 1.00000 [ng/ul] (not used in calc.)
Use Multiplier & Dilution Factor with ISTDs
```

Signal 1: VWD1 A, Wavelength=254 nm

| Peak # | RetTime [min] | Type | Width [min] | Area mAU *s | Height [mAU] | Area %  |
|--------|---------------|------|-------------|-------------|--------------|---------|
| 1      | 26.444        | VB   | 0.6009      | 1.35843e4   | 348.07138    | 33.0314 |
| 2      | 32.747        | BV   | 0.7833      | 1.37832e4   | 269.39120    | 33.5150 |
| 3      | 35.371        | VV   | 0.7583      | 6964.91602  | 140.99208    | 16.9358 |
| 4      | 37.600        | VB   | 0.8142      | 6792.98926  | 128.61781    | 16.5177 |

Totals : 4.11254e4 887.07248

=====  
\*\*\* End of Report \*\*\*

Data File C:\CHEM32\1\DATA\YZHENG\3-85.D  
Sample Name: 3-85

```
=====
Acq. Operator   : yang
Acq. Instrument : Instrument 1
Injection Date  : 8/30/2011 11:48:31 AM
Location       : Vial 51
Inj Volume     : 5 µl

Acq. Method    : C:\CHEM32\1\METHODS\METHOD1.M
Last changed   : 8/30/2011 11:00:10 AM by yang
                (modified after loading)
Analysis Method: C:\CHEM32\1\METHODS\METHOD1.M
Last changed   : 8/30/2011 2:13:00 PM by xiao
                (modified after loading)
Sample Info    : AD-H, Hex:IPA = 99:1, 1 mL/min, 254 nm, 44 bar, Left
=====
```

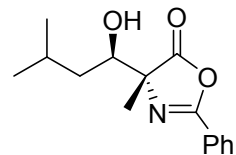

**8ca**

95% ee, anti/syn = 98/2

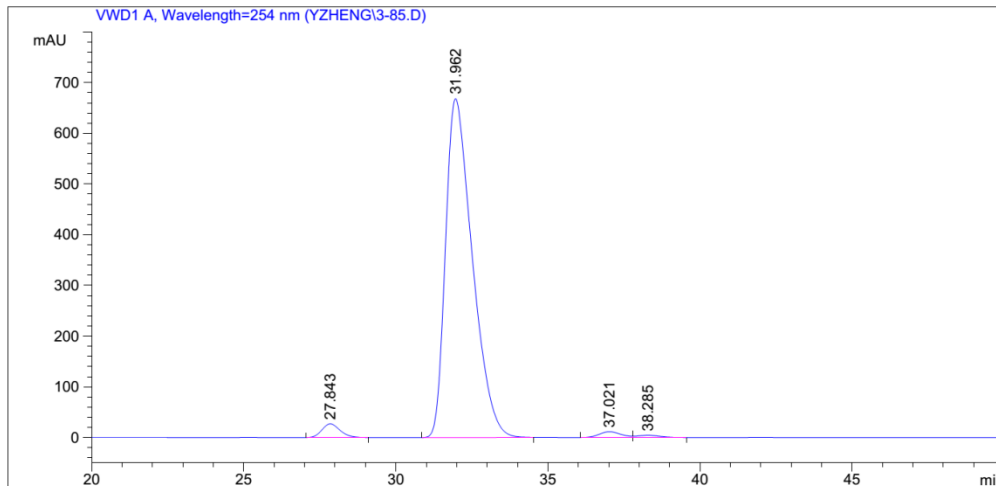

=====  
Area Percent Report  
=====

```
Sorted By      : Signal
Multiplier     : 1.0000
Dilution       : 1.0000
Sample Amount  : 1.00000 [ng/ul] (not used in calc.)
Use Multiplier & Dilution Factor with ISTDs
```

Signal 1: VWD1 A, Wavelength=254 nm

| Peak # | RetTime [min] | Type | Width [min] | Area mAU   | Area *s   | Height [mAU] | Area % |
|--------|---------------|------|-------------|------------|-----------|--------------|--------|
| 1      | 27.843        | BB   | 0.6423      | 1125.41760 | 26.98795  | 2.6308       |        |
| 2      | 31.962        | BB   | 0.9270      | 4.08507e4  | 668.41473 | 95.4950      |        |
| 3      | 37.021        | BV   | 0.7711      | 567.44141  | 11.40712  | 1.3265       |        |
| 4      | 38.285        | VB   | 0.7853      | 234.28592  | 4.43397   | 0.5477       |        |

Totals : 4.27778e4 711.24377

=====  
\*\*\* End of Report \*\*\*



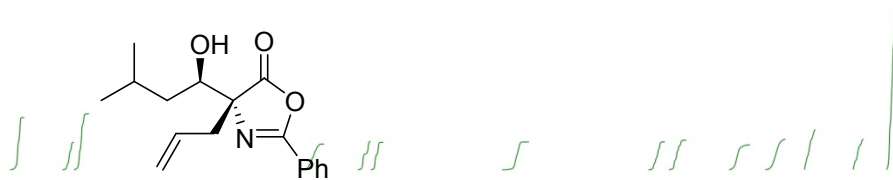

8da

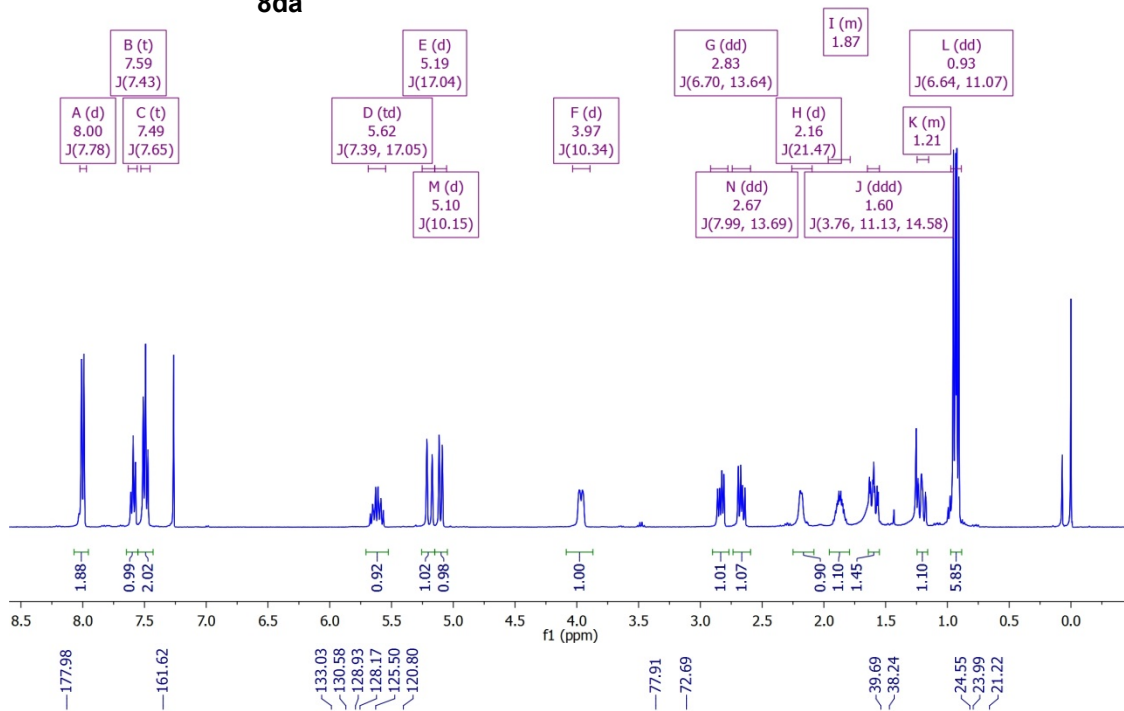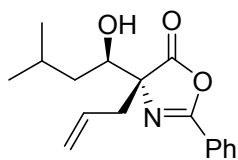

8da

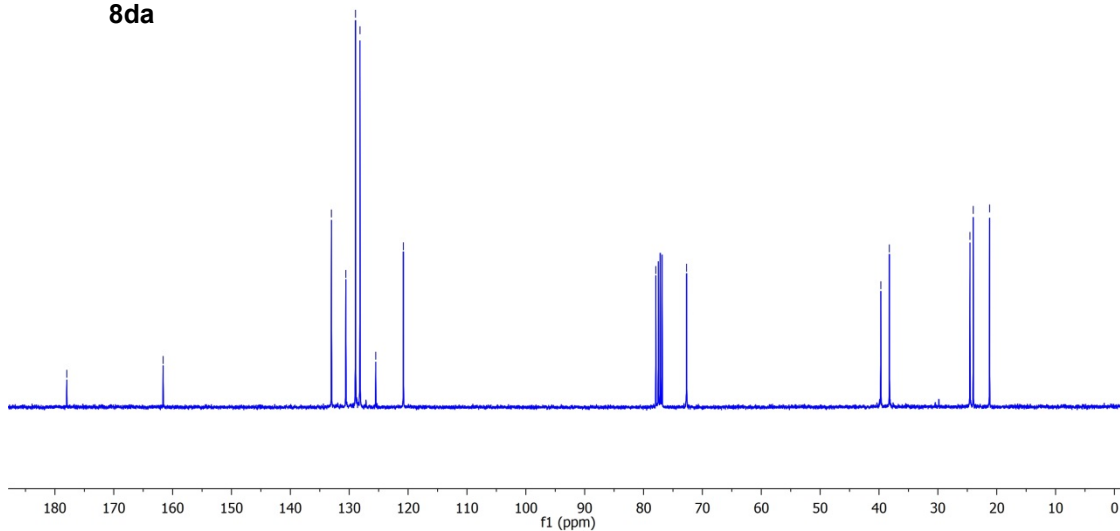

Data File C:\CHEM32\1\DATA\YZHENG\2-68RAC\_1.D  
Sample Name: 2-68rac

```
=====
Acq. Operator   : yang
Acq. Instrument : Instrument 1
Injection Date  : 1/13/2011 11:35:19 AM
Acq. Method     : C:\CHEM32\1\METHODS\METHOD-1_LC.M
Last changed    : 1/13/2011 10:39:23 AM by yang
                  (modified after loading)
Analysis Method : C:\CHEM32\1\METHODS\WASH.M
Last changed    : 8/29/2011 10:29:09 AM by yang
                  (modified after loading)
Sample Info     : AD-H, Hex:IPA = 96:4, 1 mL/min, 254 nm, 40 bar, Right
=====
```

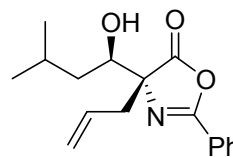

**8da**  
Racemic

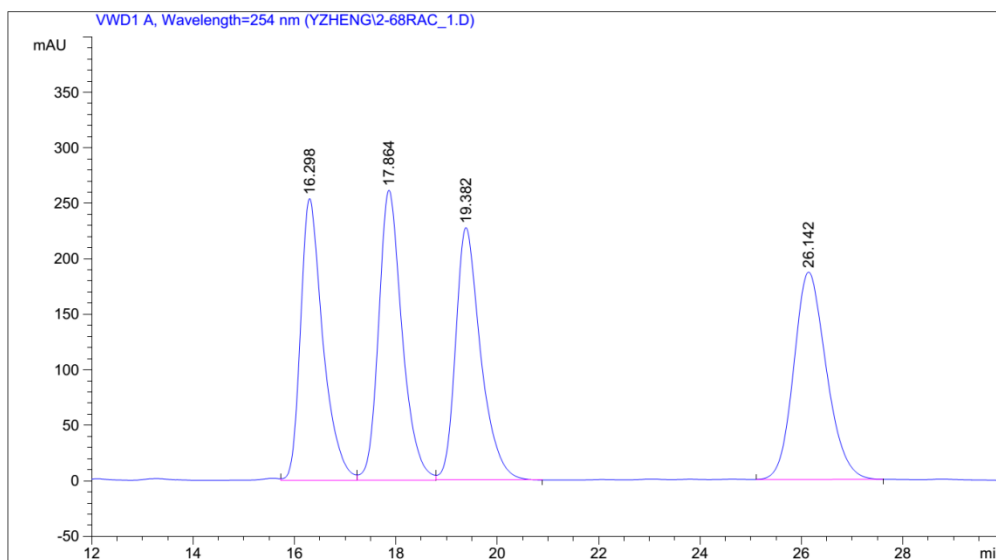

=====  
Area Percent Report  
=====

Sorted By : Signal  
Multiplier : 1.0000  
Dilution : 1.0000  
Use Multiplier & Dilution Factor with ISTDs

Signal 1: VWD1 A, Wavelength=254 nm

| Peak # | RetTime [min] | Type | Width [min] | Area mAU   | Area *s   | Height [mAU] | Area % |
|--------|---------------|------|-------------|------------|-----------|--------------|--------|
| 1      | 16.298        | VV   | 0.4573      | 7755.66309 | 253.59787 | 23.9816      |        |
| 2      | 17.864        | VV   | 0.4866      | 8413.77637 | 261.07626 | 26.0166      |        |
| 3      | 19.382        | VB   | 0.5166      | 7826.41553 | 227.39288 | 24.2004      |        |
| 4      | 26.142        | BB   | 0.6843      | 8344.20117 | 186.77571 | 25.8014      |        |

Totals : 3.23401e4 928.84273

=====  
\*\*\* End of Report \*\*\*

Data File C:\CHEM32\1\DATA\YZHENG\2-66\_1.D  
Sample Name: 2-66

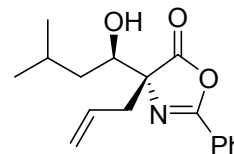

**8da**

94% ee, anti/syn = 98/2

=====  
Acq. Operator : yang  
Acq. Instrument : Instrument 1 Location : -  
Injection Date : 1/13/2011 12:11:33 PM  
Acq. Method : C:\CHEM32\1\METHODS\METHOD-1\_LC.M  
Last changed : 1/13/2011 12:12:37 PM by yang  
(modified after loading)  
Analysis Method : C:\CHEM32\1\METHODS\WASH.M  
Last changed : 8/29/2011 10:28:01 AM by yang  
(modified after loading)  
Sample Info : AD-H, Hex:IPA = 96:4, 1 mL/min, 254 nm, 40 bar, Right

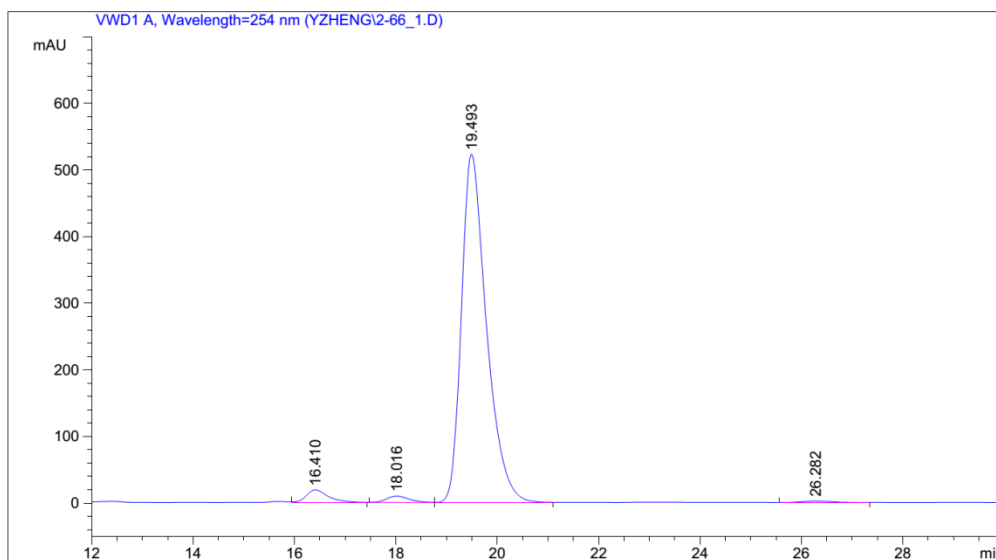

=====  
Area Percent Report  
=====

Sorted By : Signal  
Multiplier : 1.0000  
Dilution : 1.0000  
Use Multiplier & Dilution Factor with ISTDs

Signal 1: VWD1 A, Wavelength=254 nm

| Peak # | RetTime [min] | Type | Width [min] | Area mAU  | Height [mAU] | Area %  |
|--------|---------------|------|-------------|-----------|--------------|---------|
| 1      | 16.410        | VB   | 0.4480      | 578.97461 | 19.11654     | 3.0657  |
| 2      | 18.016        | BV   | 0.4745      | 304.32053 | 9.79644      | 1.6114  |
| 3      | 19.493        | VB   | 0.5146      | 1.79064e4 | 522.82092    | 94.8149 |
| 4      | 26.282        | BB   | 0.6333      | 95.94662  | 2.20955      | 0.5080  |

Totals : 1.88856e4 553.94345

=====  
\*\*\* End of Report \*\*\*

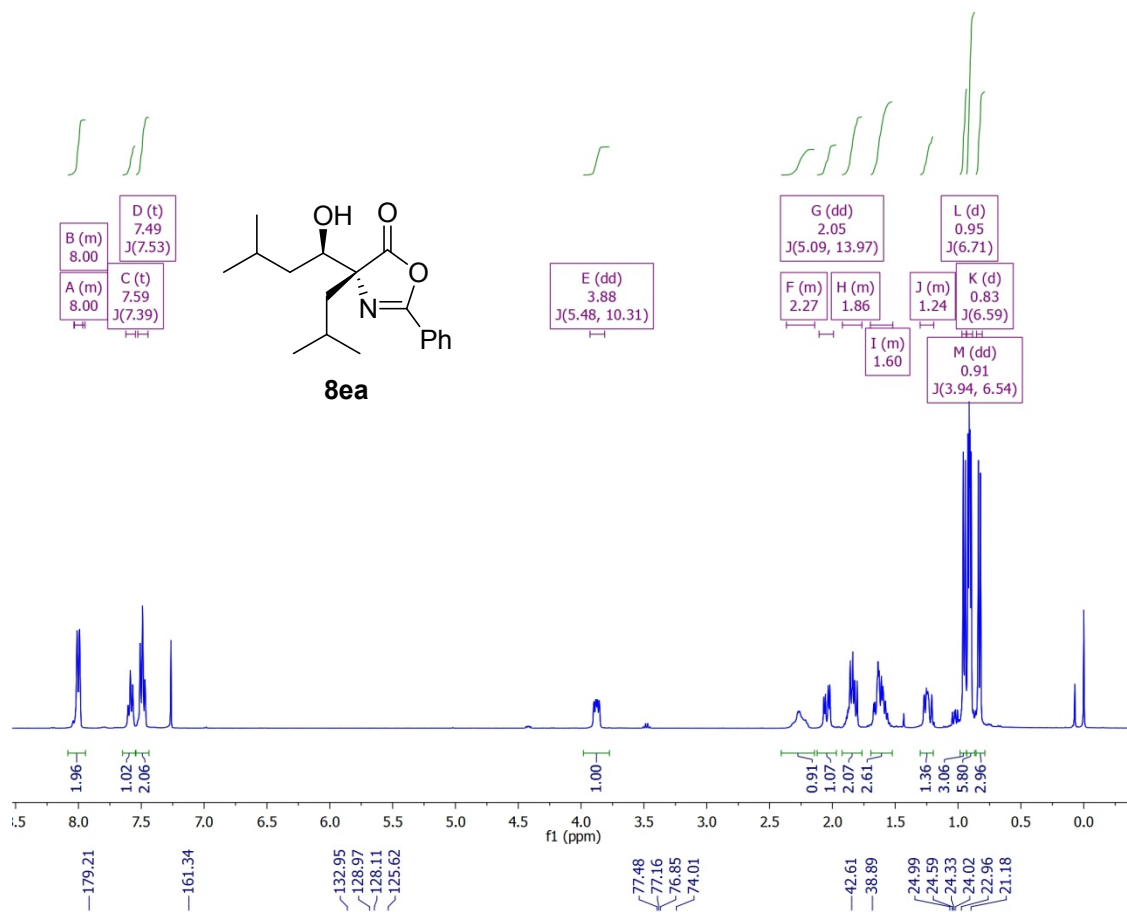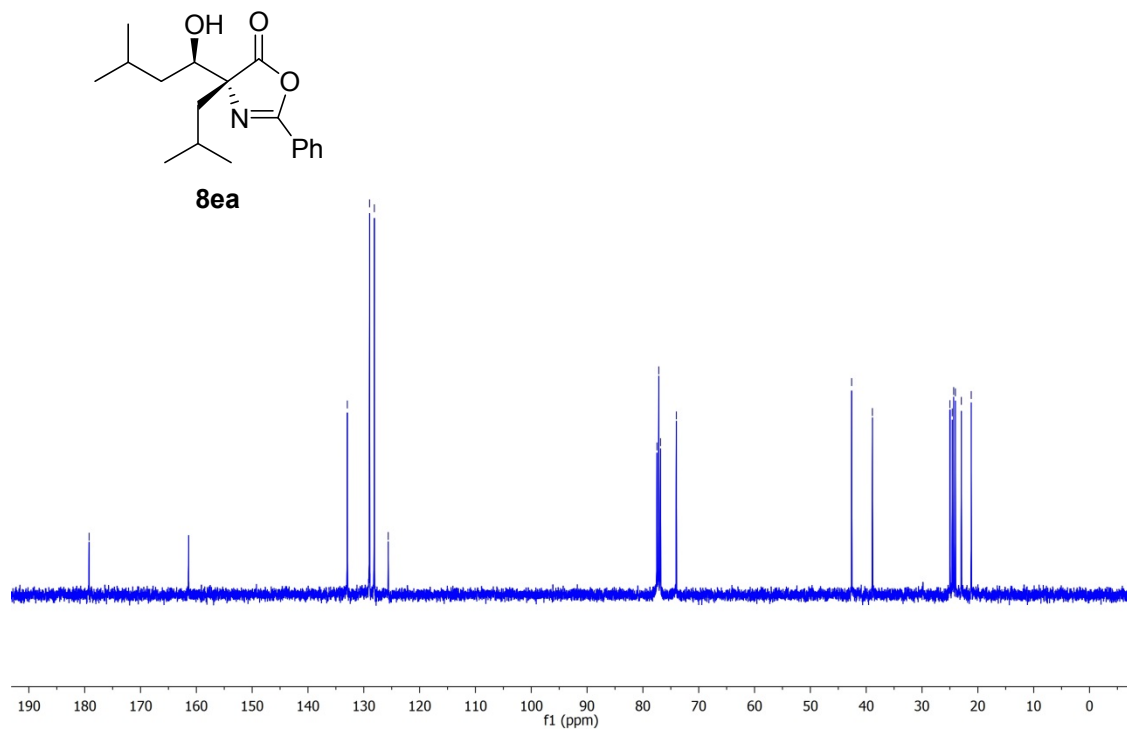

Data File C:\CHEM32\1\DATA\YZHENG\3-60RAC\_1.D  
Sample Name: 3-60rac

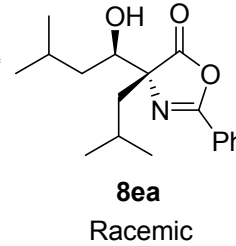

```
=====
Acq. Operator   : yang
Acq. Instrument : Instrument 1          Location : -
Injection Date  : 7/28/2011 11:21:48 AM
Acq. Method     : C:\CHEM32\1\METHODS\METHOD-1_LC.M
Last changed    : 7/28/2011 10:55:57 AM by yang
                  (modified after loading)
Analysis Method : C:\CHEM32\1\METHODS\METHOD-1_LC.M
Last changed    : 8/1/2011 12:58:37 PM by yang
                  (modified after loading)
Sample Info     : AD-H, Hex:IPA = 96:4, 1.0 mL/min, 254 nm, 39 bar, Right
=====
```

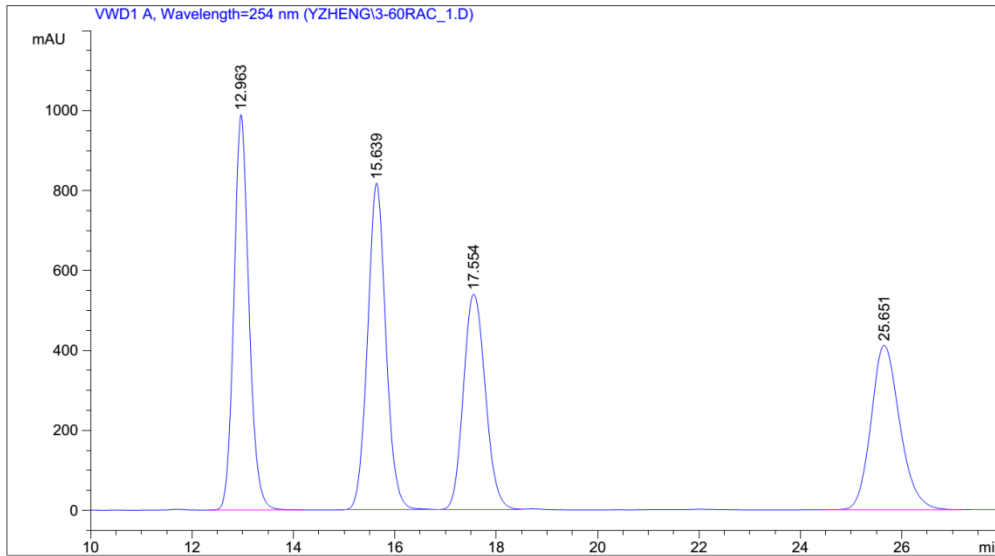

=====  
Area Percent Report  
=====

Sorted By : Signal  
Multiplier : 1.0000  
Dilution : 1.0000  
Use Multiplier & Dilution Factor with ISTDs

Signal 1: VWD1 A, Wavelength=254 nm

| Peak # | RetTime [min] | Type | Width [min] | Area mAU  | Area *s   | Height [mAU] | Area % |
|--------|---------------|------|-------------|-----------|-----------|--------------|--------|
| 1      | 12.963        | BB   | 0.3132      | 2.03779e4 | 989.14178 | 27.7510      |        |
| 2      | 15.639        | BV   | 0.3821      | 2.05489e4 | 817.36218 | 27.9840      |        |
| 3      | 17.554        | VV   | 0.4744      | 1.62889e4 | 539.76801 | 22.1826      |        |
| 4      | 25.651        | BB   | 0.5942      | 1.62153e4 | 411.04782 | 22.0823      |        |

Totals : 7.34310e4 2757.31979

=====  
\*\*\* End of Report \*\*\*

Data File C:\CHEM32\1\DATA\YZHENG\3-59\_1.D  
Sample Name: 3-59

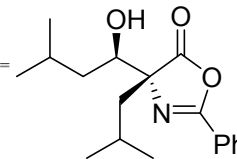

**8ea**

93% ee, anti/syn = 97.5/2.5

=====  
Acq. Operator : yang  
Acq. Instrument : Instrument 1 Location : -  
Injection Date : 7/29/2011 12:00:11 AM  
Acq. Method : C:\CHEM32\1\METHODS\METHOD-1\_LC.M  
Last changed : 7/28/2011 11:37:54 PM by yang  
(modified after loading)  
Analysis Method : C:\CHEM32\1\METHODS\METHOD-1\_LC.M  
Last changed : 8/1/2011 12:56:49 PM by yang  
(modified after loading)  
Sample Info : AD-H, Hex:IPA = 96:4, 1.0 mL/min, 254 nm, 39 bar, Right

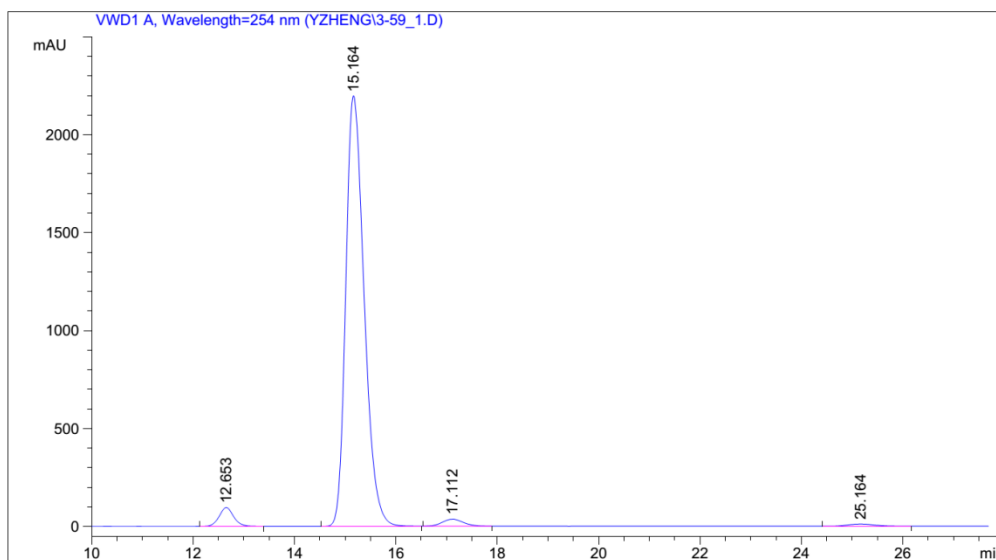

=====  
Area Percent Report  
=====

Sorted By : Signal  
Multiplier : 1.0000  
Dilution : 1.0000  
Use Multiplier & Dilution Factor with ISTDs

Signal 1: VWD1 A, Wavelength=254 nm

| Peak # | RetTime [min] | Type | Width [min] | Area mAU   | Height [mAU] | Area %  |
|--------|---------------|------|-------------|------------|--------------|---------|
| 1      | 12.653        | BB   | 0.3011      | 1925.33533 | 96.53149     | 3.2858  |
| 2      | 15.164        | BB   | 0.3891      | 5.51910e4  | 2197.30835   | 94.1898 |
| 3      | 17.112        | BB   | 0.4435      | 1045.66577 | 36.33644     | 1.7845  |
| 4      | 25.164        | BB   | 0.5818      | 433.50134  | 11.44081     | 0.7398  |

Totals : 5.85955e4 2341.61710

=====  
\*\*\* End of Report \*\*\*

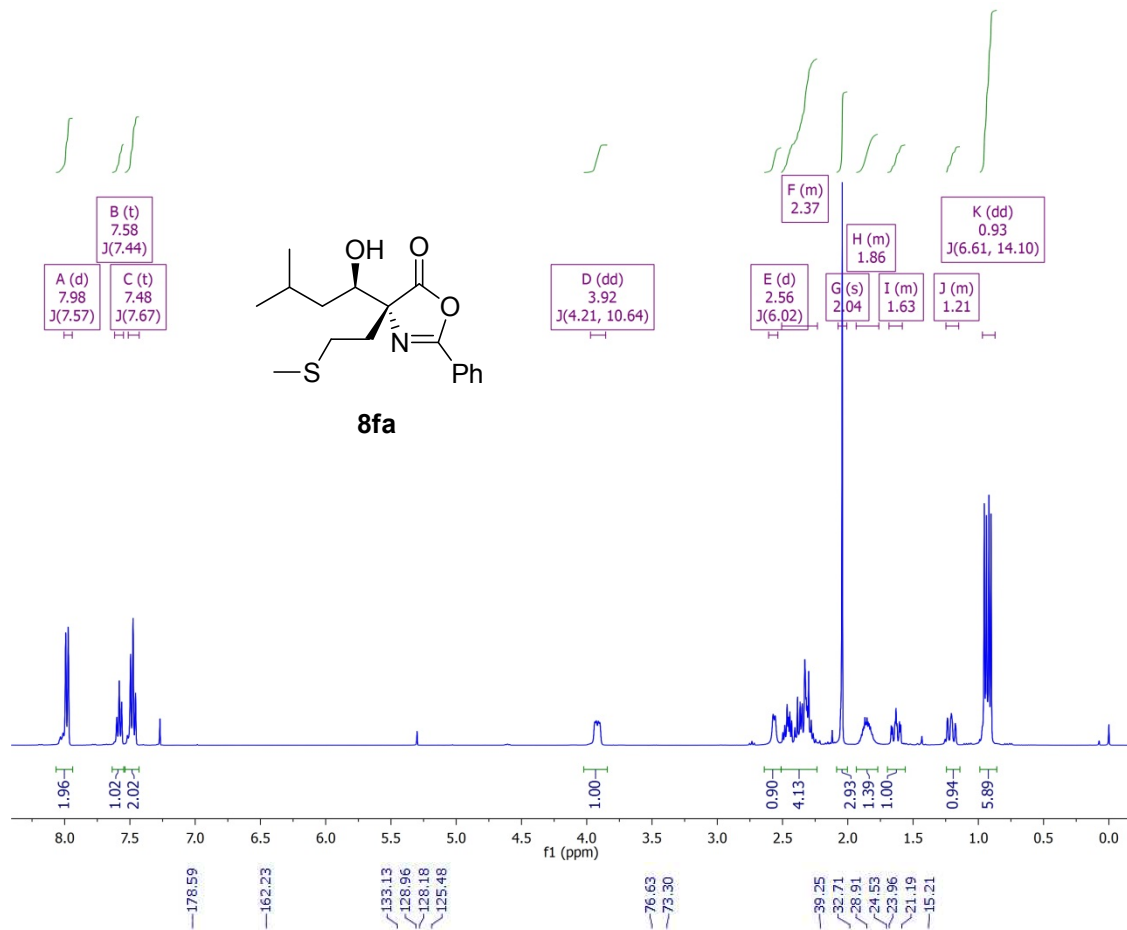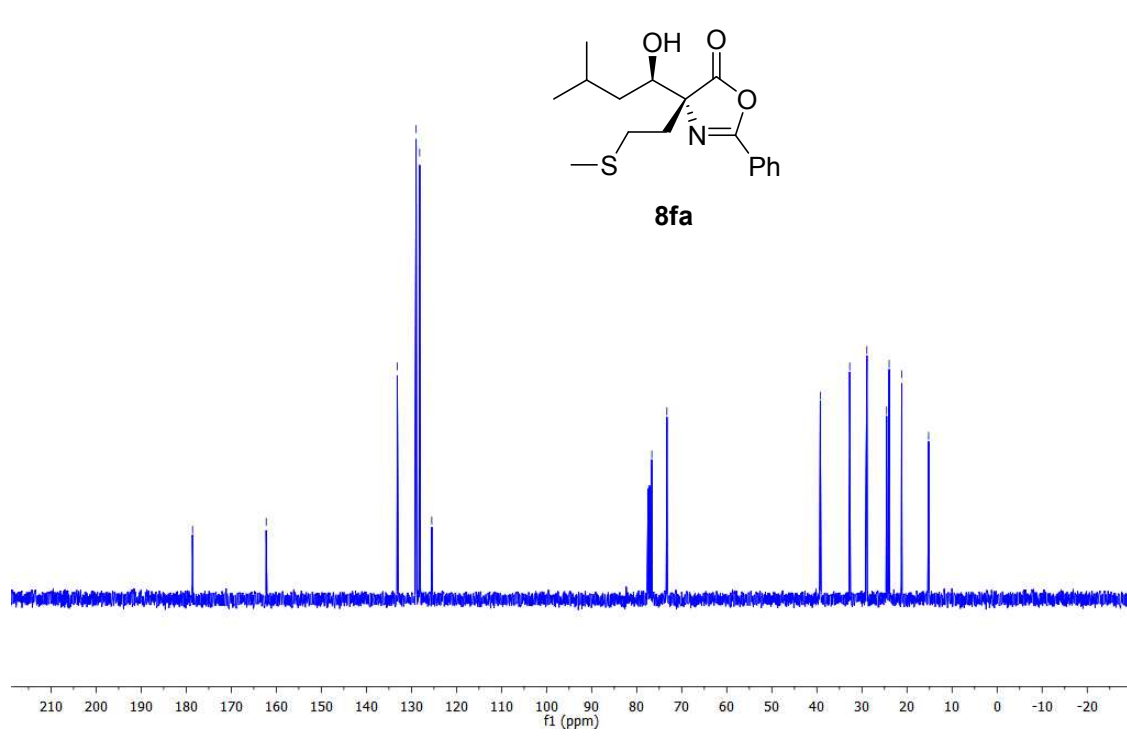

Data File C:\CHEM32\1\DATA\YZHENG\2-84RAC\_3.D  
Sample Name: 2-84rac

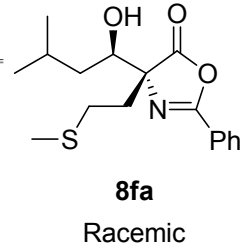

=====  
Acq. Operator : yang  
Acq. Instrument : Instrument 1 Location : -  
Injection Date : 1/27/2011 6:18:51 PM  
Acq. Method : C:\CHEM32\1\METHODS\METHOD-1\_LC.M  
Last changed : 1/27/2011 6:08:05 PM by yang  
(modified after loading)  
Analysis Method : C:\CHEM32\1\METHODS\WASH.M  
Last changed : 8/31/2011 11:14:37 AM by yang  
(modified after loading)  
Sample Info : AD-H, Hex:IPA = 96.5:3.5, 1 mL/min, 254 nm, 39 bar, Righ  
t

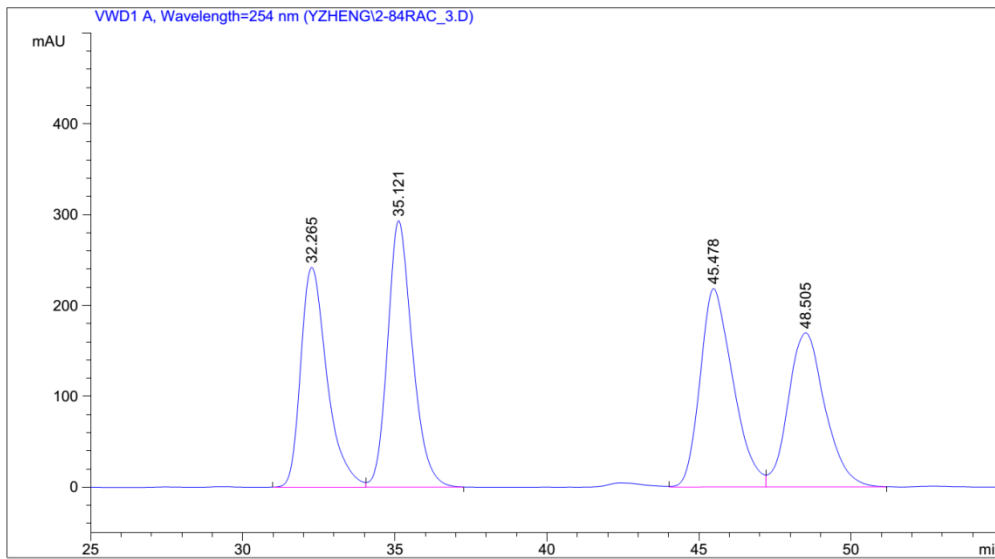

=====  
Area Percent Report  
=====

Sorted By : Signal  
Multiplier : 1.0000  
Dilution : 1.0000  
Use Multiplier & Dilution Factor with ISTDs

Signal 1: VWD1 A, Wavelength=254 nm

| Peak # | RetTime [min] | Type | Width [min] | Area mAU*s | Height [mAU] | Area %  |
|--------|---------------|------|-------------|------------|--------------|---------|
| 1      | 32.265        | BV   | 0.9091      | 1.45334e4  | 241.92194    | 23.5229 |
| 2      | 35.121        | VB   | 0.8421      | 1.65952e4  | 293.30771    | 26.8599 |
| 3      | 45.478        | VV   | 1.0786      | 1.64092e4  | 218.47810    | 26.5589 |
| 4      | 48.505        | VB   | 1.2715      | 1.42463e4  | 169.54929    | 23.0582 |

Totals : 6.17841e4 923.25703

=====  
\*\*\* End of Report \*\*\*



Data File C:\CHEM32\1\DATA\YZHENG\3-66.D  
Sample Name: 3-66

```
=====
Acq. Operator   : yang
Acq. Instrument : Instrument 1
Injection Date  : 8/15/2011 12:54:41 PM
Acq. Method    : C:\CHEM32\1\METHODS\METHOD-1_LC.M
Last changed   : 8/15/2011 11:01:25 AM by yang
                (modified after loading)
Analysis Method: C:\CHEM32\1\METHODS\WASH.M
Last changed   : 8/15/2011 5:03:25 PM by yang
                (modified after loading)
Sample Info    : AD-H, Hex:IPA = 96.5:3.5, 1 mL/min, 254 nm, 40 bar, Rig
                ht
=====
```

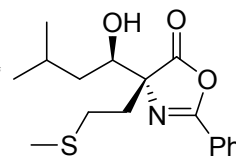

**8fa**

92% ee, *anti*/*syn* = 97/3

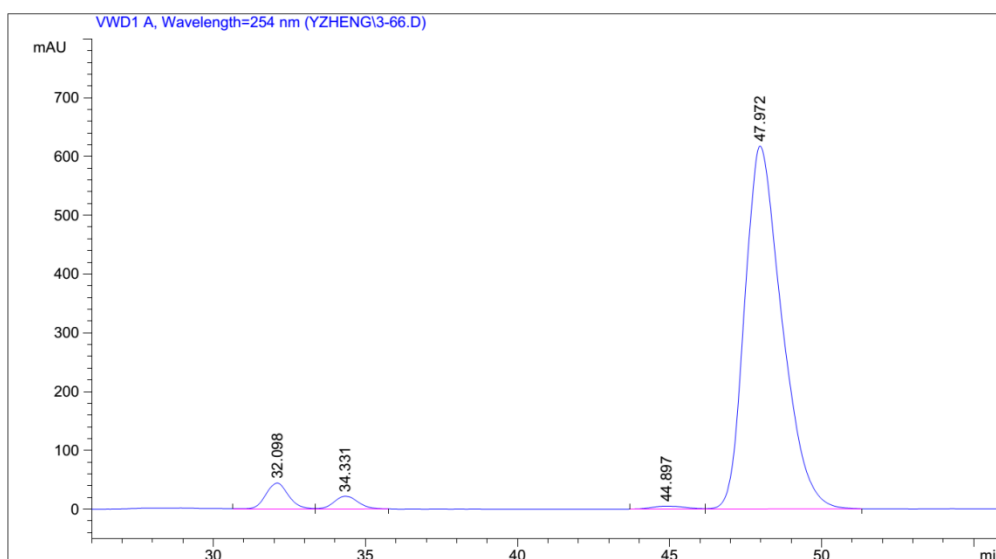

=====  
Area Percent Report  
=====

Sorted By : Signal  
Multiplier : 1.0000  
Dilution : 1.0000  
Use Multiplier & Dilution Factor with ISTDs

Signal 1: VWD1 A, Wavelength=254 nm

| Peak # | RetTime [min] | Type | Width [min] | Area mAU*s | Height [mAU] | Area %  |
|--------|---------------|------|-------------|------------|--------------|---------|
| 1      | 32.098        | VV   | 0.8085      | 2286.37842 | 44.11148     | 4.0707  |
| 2      | 34.331        | VB   | 0.8557      | 1195.80103 | 21.49694     | 2.1290  |
| 3      | 44.897        | BV   | 0.9209      | 370.31412  | 4.92522      | 0.6593  |
| 4      | 47.972        | VB   | 1.2040      | 5.23148e4  | 617.45117    | 93.1410 |

Totals : 5.61673e4 687.98482

=====  
\*\*\* End of Report \*\*\*

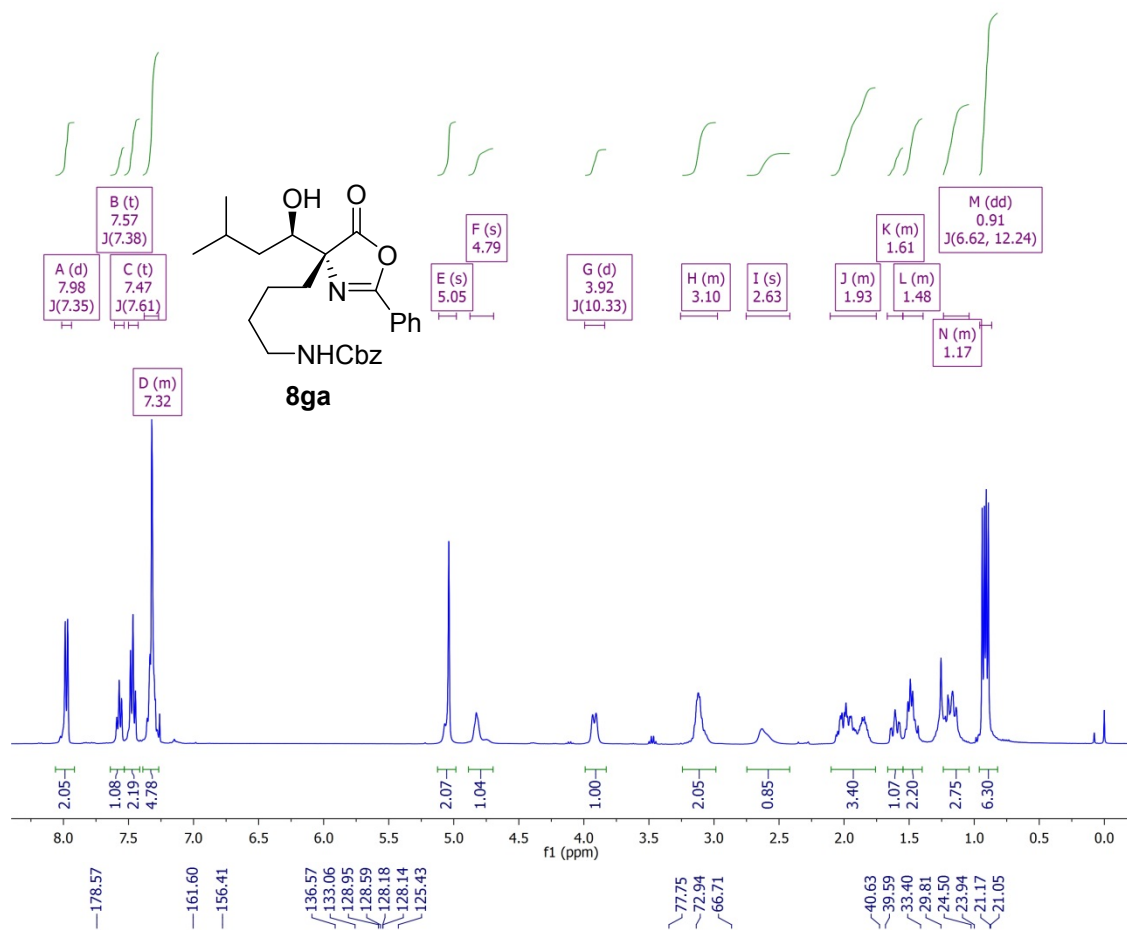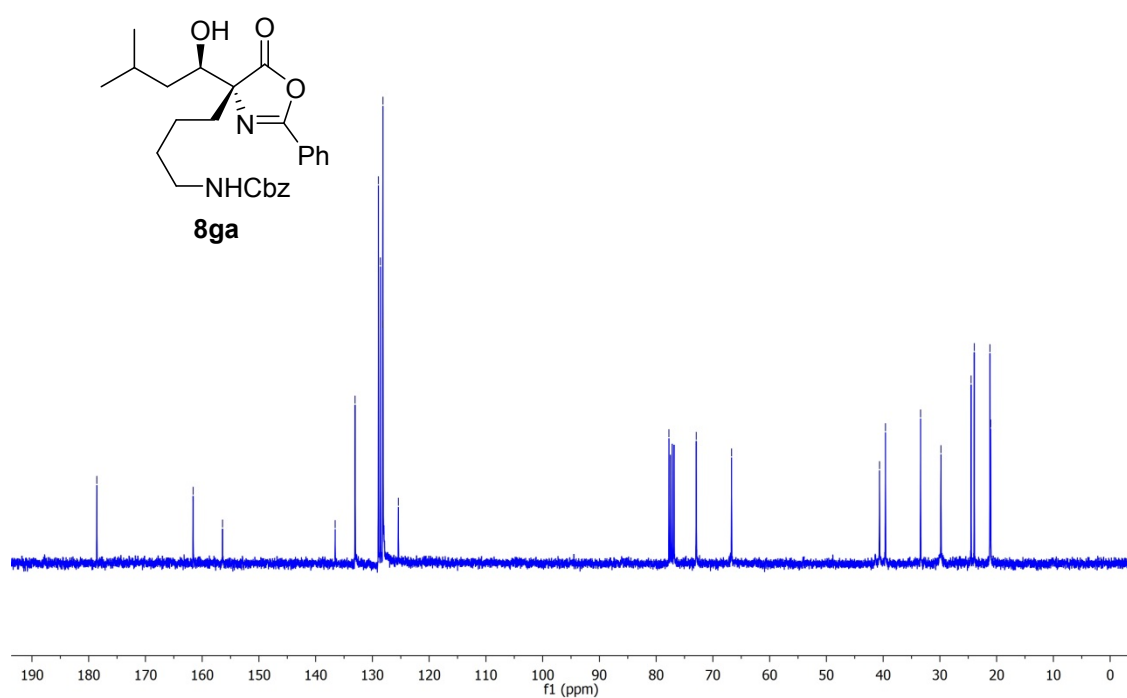

Data File C:\CHEM32\1\DATA\YZHENG\3-72RAC\_1.D  
Sample Name: 2-72rac

=====  
Acq. Operator : yang  
Acq. Instrument : Instrument 1 Location : -  
Injection Date : 8/11/2011 3:44:19 PM  
Acq. Method : C:\CHEM32\1\METHODS\METHOD-1\_LC.M  
Last changed : 8/11/2011 2:59:20 PM by yang  
(modified after loading)  
Analysis Method : C:\CHEM32\1\METHODS\METHOD-1\_LC.M  
Last changed : 8/11/2011 6:27:53 PM by yang  
(modified after loading)  
Sample Info : AD-H, Hex:IPA = 87:13, 1 mL/min, 254 nm, 43 bar, Right

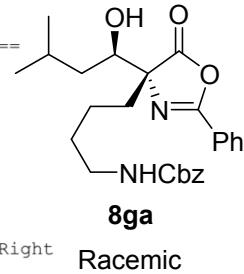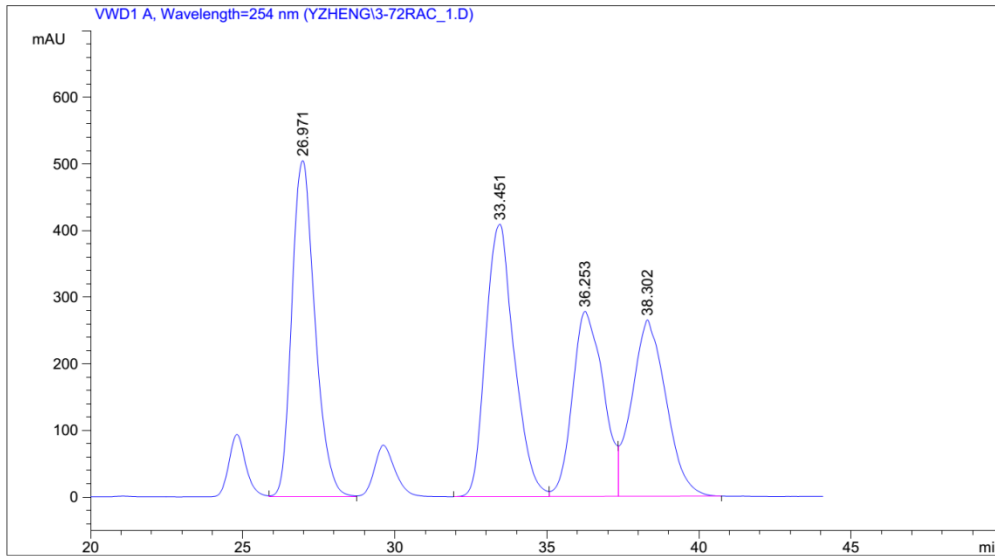

=====  
Area Percent Report  
=====

Sorted By : Signal  
Multiplier : 1.0000  
Dilution : 1.0000  
Use Multiplier & Dilution Factor with ISTDs

Signal 1: VWD1 A, Wavelength=254 nm

| Peak # | RetTime [min] | Type | Width [min] | Area mAU  | Height [mAU] | Area %  |
|--------|---------------|------|-------------|-----------|--------------|---------|
| 1      | 26.971        | VV   | 0.7904      | 2.67048e4 | 504.80145    | 28.5004 |
| 2      | 33.451        | BV   | 1.0009      | 2.66542e4 | 408.83020    | 28.4464 |
| 3      | 36.253        | VV   | 0.9966      | 1.96091e4 | 277.86295    | 20.9276 |
| 4      | 38.302        | VB   | 1.0630      | 2.07317e4 | 264.91617    | 22.1257 |

Totals : 9.36999e4 1456.41077

=====  
\*\*\* End of Report \*\*\*

Data File C:\CHEM32\1\DATA\YZHENG\3-71.D  
Sample Name: 3-71

```
=====
Acq. Operator   : yang
Acq. Instrument : Instrument 1
Injection Date  : 8/11/2011 5:17:51 PM
Acq. Method     : C:\CHEM32\1\METHODS\METHOD-1_LC.M
Last changed    : 8/11/2011 4:31:09 PM by yang
                 (modified after loading)
Analysis Method : C:\CHEM32\1\METHODS\METHOD-1_LC.M
Last changed    : 8/11/2011 6:25:54 PM by yang
                 (modified after loading)
Sample Info     : AD-H, Hex:IPA = 87:13, 1 mL/min, 254 nm, 43 bar, Right
=====
```

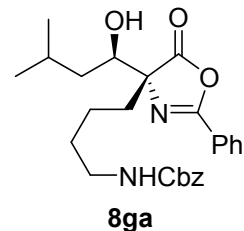

94% ee, *anti/syn* = 97.5/2.5

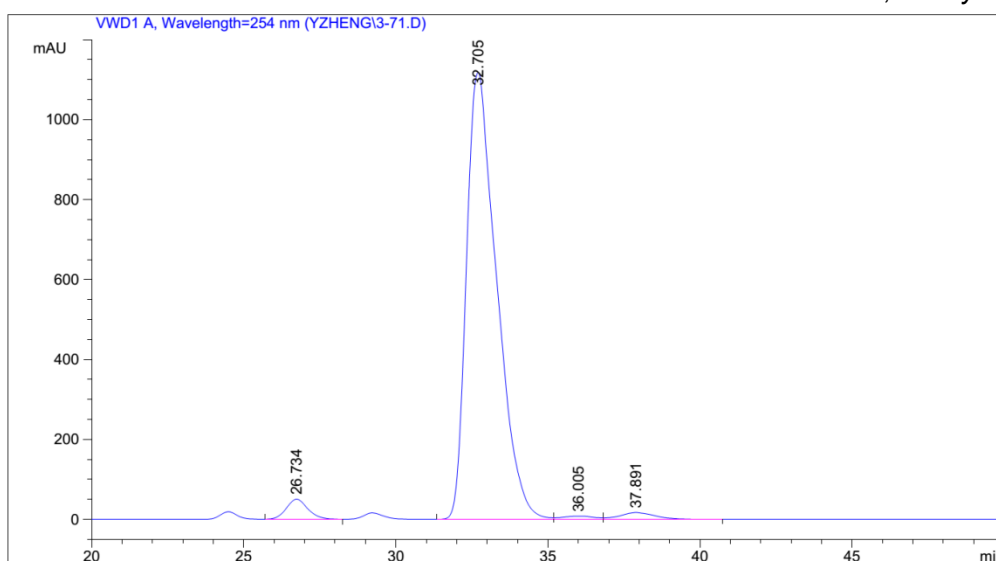

=====  
Area Percent Report  
=====

Sorted By : Signal  
Multiplier : 1.0000  
Dilution : 1.0000  
Use Multiplier & Dilution Factor with ISTDs

Signal 1: VWD1 A, Wavelength=254 nm

| Peak # | RetTime [min] | Type | Width [min] | Area mAU   | Height [mAU] | Area %  |
|--------|---------------|------|-------------|------------|--------------|---------|
| 1      | 26.734        | BB   | 0.7527      | 2456.97339 | 50.22921     | 3.0263  |
| 2      | 32.705        | BB   | 0.9954      | 7.68489e4  | 1118.29761   | 94.6549 |
| 3      | 36.005        | BV   | 0.9143      | 567.14624  | 7.90414      | 0.6986  |
| 4      | 37.891        | VB   | 0.9769      | 1315.50061 | 16.92087     | 1.6203  |

Totals : 8.11885e4 1193.35183

=====  
\*\*\* End of Report \*\*\*

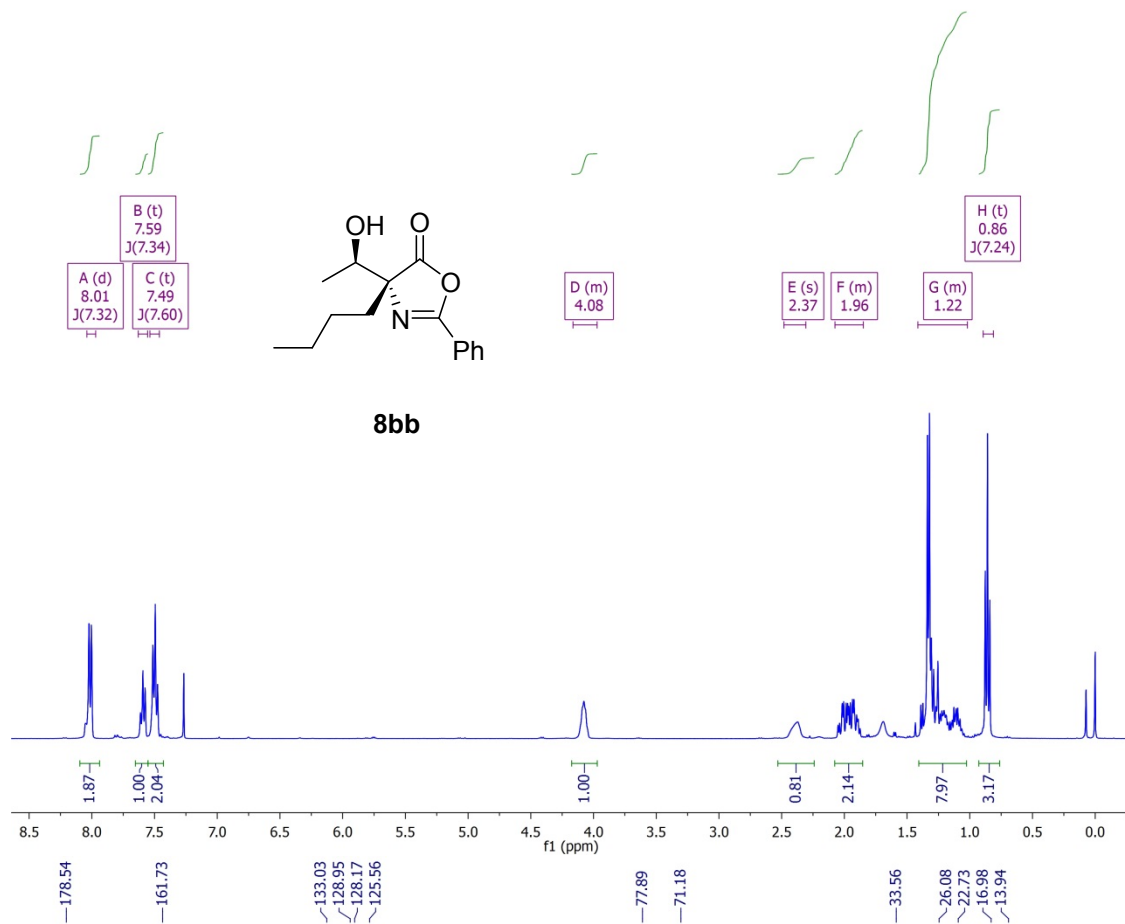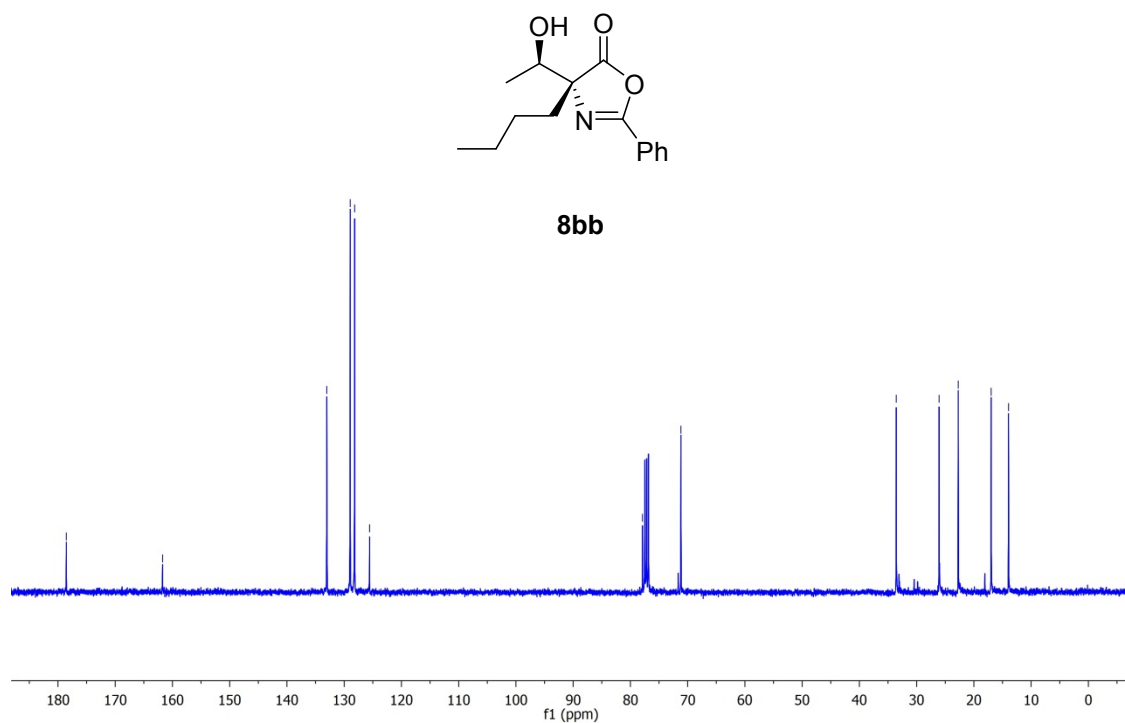

Data File C:\CHEM32\1\DATA\YZHENG\3-79RAC.D  
Sample Name: 3-79rac

=====  
Acq. Operator : yang  
Acq. Instrument : Instrument 1 Location : -  
Injection Date : 8/16/2011 5:35:41 PM  
Acq. Method : C:\CHEM32\1\METHODS\METHOD-1\_LC.M  
Last changed : 8/16/2011 5:15:02 PM by yang  
(modified after loading)  
Analysis Method : C:\CHEM32\1\METHODS\WASH.M  
Last changed : 8/16/2011 10:22:15 PM by yang  
(modified after loading)  
Sample Info : OJ-H+OJ, Hex:IPA = 96:4, 0.8 mL/min, 254 nm, 51 bar, Ri  
ght

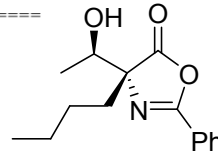

**8bb**  
Racemic

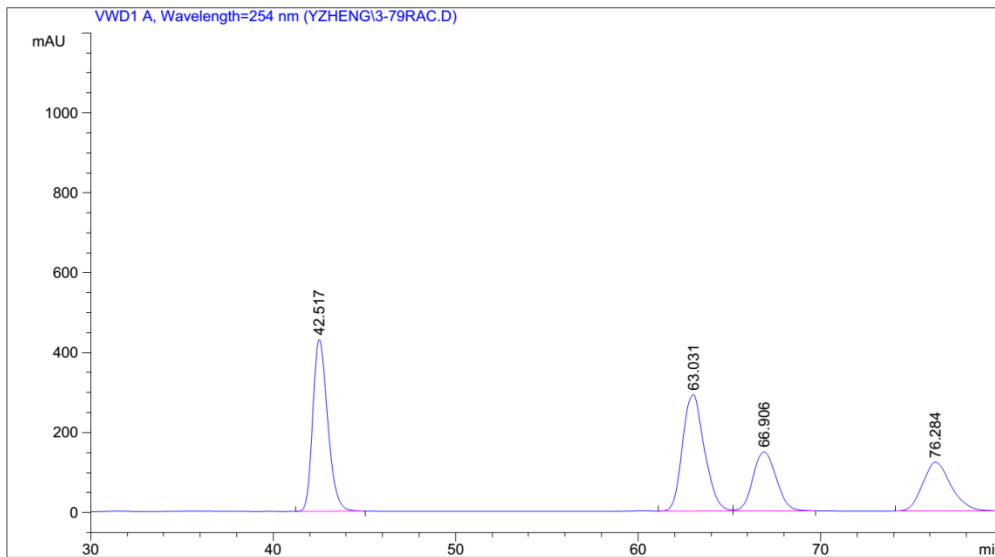

=====  
Area Percent Report  
=====

Sorted By : Signal  
Multiplier : 1.0000  
Dilution : 1.0000  
Use Multiplier & Dilution Factor with ISTDs

Signal 1: VWD1 A, Wavelength=254 nm

| Peak # | RetTime [min] | Type | Width [min] | Area [mAU*s] | Height [mAU] | Area %  |
|--------|---------------|------|-------------|--------------|--------------|---------|
| 1      | 42.517        | BB   | 0.8859      | 2.44250e4    | 429.74283    | 32.5804 |
| 2      | 63.031        | VV   | 1.2815      | 2.43056e4    | 291.49854    | 32.4211 |
| 3      | 66.906        | VB   | 1.4139      | 1.31029e4    | 148.06441    | 17.4778 |
| 4      | 76.284        | BB   | 1.6199      | 1.31349e4    | 122.15461    | 17.5206 |

Totals : 7.49684e4 991.46038

=====  
\*\*\* End of Report \*\*\*

Data File C:\CHEM32\1\DATA\YZHENG\3-79.D  
Sample Name: 3-79

=====  
Acq. Operator : yang  
Acq. Instrument : Instrument 1  
Injection Date : 8/16/2011 8:43:08 PM  
Acq. Method : C:\CHEM32\1\METHODS\METHOD-1\_LC.M  
Last changed : 8/16/2011 5:15:02 PM by yang  
(modified after loading)  
Analysis Method : C:\CHEM32\1\METHODS\WASH.M  
Last changed : 8/16/2011 10:21:37 PM by yang  
(modified after loading)  
Sample Info : OJ-H+OJ, Hex:IPA = 96:4, 0.8 mL/min, 254 nm, 52 bar, Ri  
ght

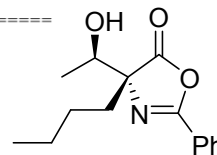

**8bb**  
88% ee, anti/syn = 90.5/9.5

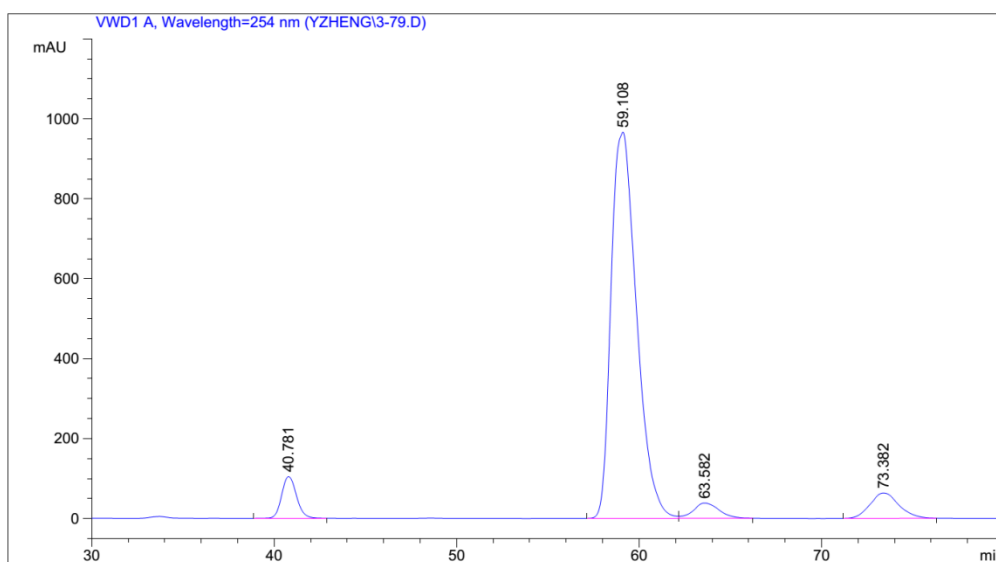

=====  
Area Percent Report  
=====

Sorted By : Signal  
Multiplier : 1.0000  
Dilution : 1.0000  
Use Multiplier & Dilution Factor with ISTDs

Signal 1: VWD1 A, Wavelength=254 nm

| Peak # | RetTime [min] | Type | Width [min] | Area mAU *s | Height [mAU] | Area %  |
|--------|---------------|------|-------------|-------------|--------------|---------|
| 1      | 40.781        | BB   | 0.8862      | 5945.25244  | 104.31563    | 5.3903  |
| 2      | 59.108        | BB   | 1.3108      | 9.36414e4   | 966.55273    | 84.9013 |
| 3      | 63.582        | BB   | 1.3658      | 3728.47119  | 38.25199     | 3.3805  |
| 4      | 73.382        | BB   | 1.6048      | 6979.34521  | 63.24734     | 6.3279  |

Totals : 1.10294e5 1172.36769

=====  
\*\*\* End of Report \*\*\*

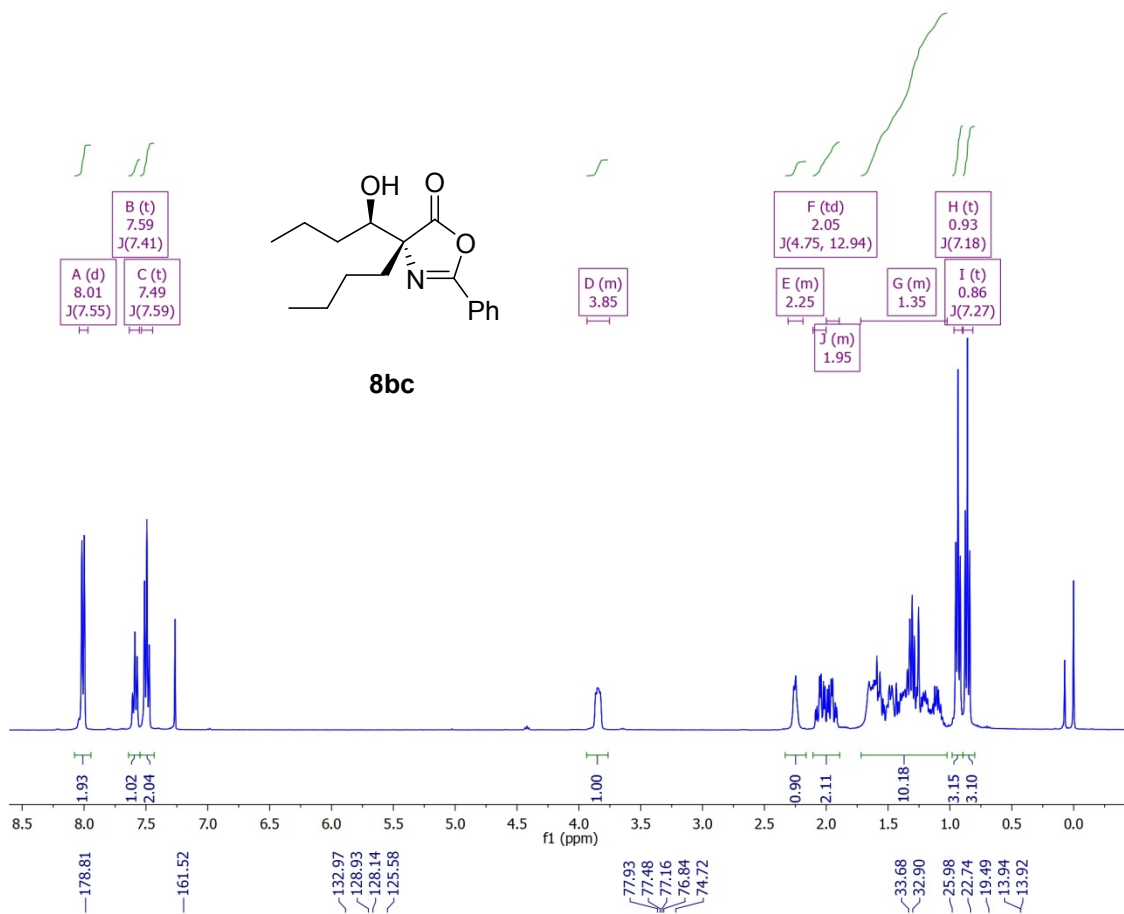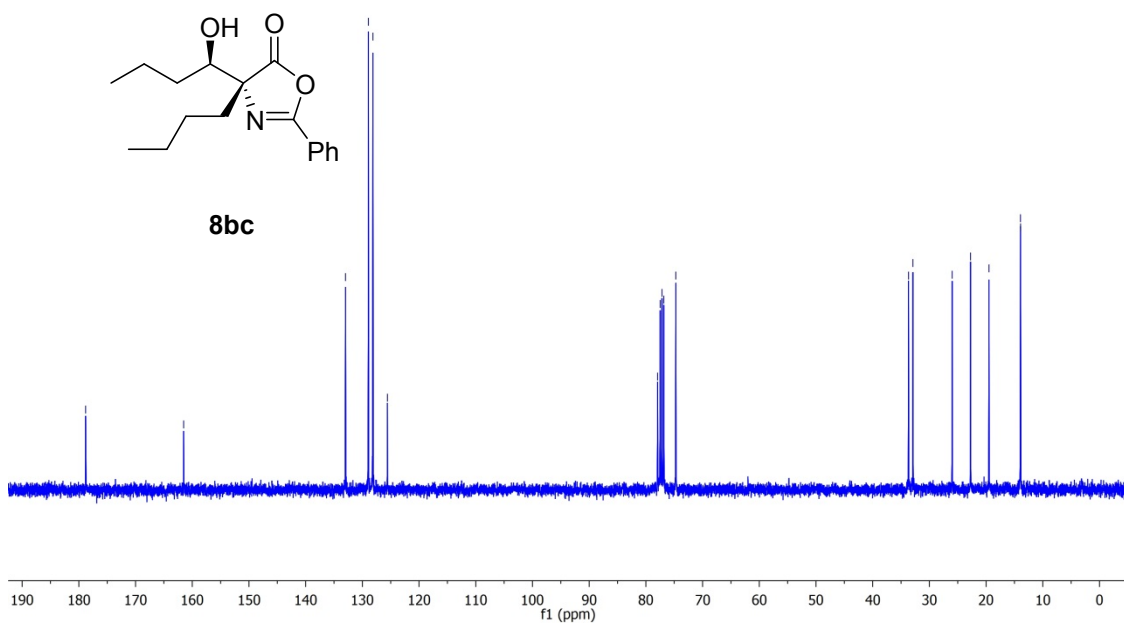



Data File C:\CHEM32\1\DATA\YZHENG\3-112RAC\_1.D  
Sample Name: 3-22

=====  
Acq. Operator : yang  
Acq. Instrument : Instrument 1  
Injection Date : 10/3/2011 8:02:06 PM  
Acq. Method : C:\CHEM32\1\METHODS\YANG.M  
Last changed : 10/3/2011 7:27:20 PM by yang  
(modified after loading)  
Analysis Method : C:\CHEM32\1\METHODS\YANG.M  
Last changed : 10/4/2011 12:55:14 PM by yang  
(modified after loading)  
Sample Info : AD-H+AD, Hex:IPA = 97.2:2.8, 0.8 mL/min, 254 nm, 43 bar  
, Right

Location : -

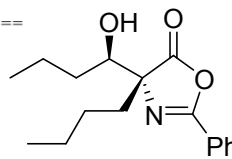

**8bc**

Racemic

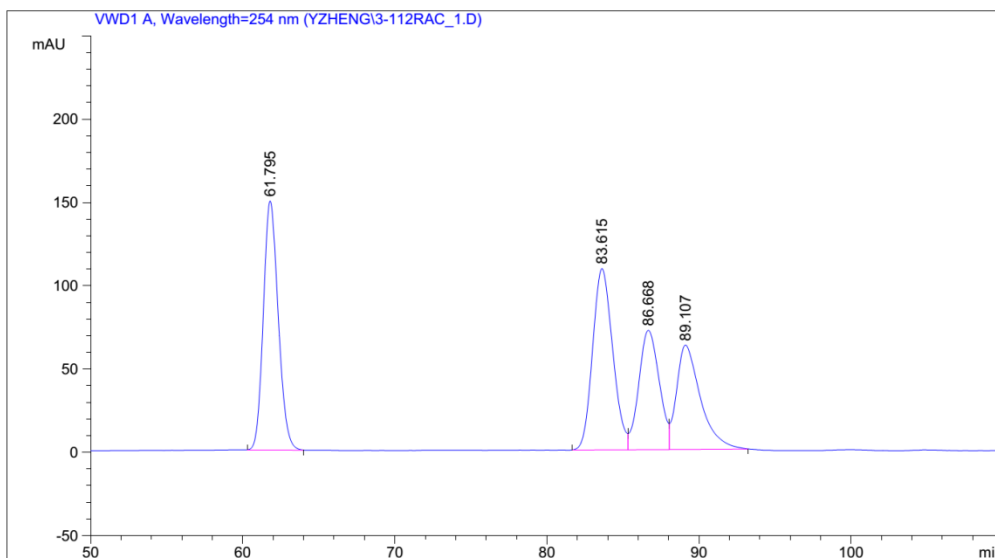

=====  
Area Percent Report  
=====

Sorted By : Signal  
Multiplier : 1.0000  
Dilution : 1.0000  
Use Multiplier & Dilution Factor with ISTDs

Signal 1: VWD1 A, Wavelength=254 nm

| Peak # | RetTime [min] | Type | Width [min] | Area mAU*s | Height [mAU] | Area %  |
|--------|---------------|------|-------------|------------|--------------|---------|
| 1      | 61.795        | BB   | 1.0586      | 1.01515e4  | 149.51230    | 30.1216 |
| 2      | 83.615        | BV   | 1.4019      | 9997.66309 | 108.86904    | 29.6651 |
| 3      | 86.668        | VV   | 1.4206      | 6694.03369 | 71.64605     | 19.8626 |
| 4      | 89.107        | VB   | 1.5286      | 6858.53320 | 62.67318     | 20.3507 |

Totals : 3.37017e4 392.70057

=====  
\*\*\* End of Report \*\*\*

Instrument 1 10/4/2011 12:55:26 PM yang

Page 1 of 1

Data File C:\CHEM32\1\DATA\YZHENG\3-111\_1.D  
Sample Name: 3-111

=====  
Acq. Operator : yang  
Acq. Instrument : Instrument 1  
Injection Date : 10/4/2011 1:48:56 PM  
Acq. Method : C:\CHEM32\1\METHODS\YANG.M  
Last changed : 10/4/2011 1:08:48 PM by yang  
(modified after loading)  
Analysis Method : C:\CHEM32\1\METHODS\YANG.M  
Last changed : 10/4/2011 3:52:38 PM by yang  
(modified after loading)  
Sample Info : AD-H+AD, Hex:IPA = 97.2:2.8, 0.8 mL/min, 254 nm, 43 bar  
, Right

Location : -

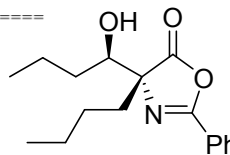

**8bc**

94% ee, *anti*/syn = 97.5/2.5

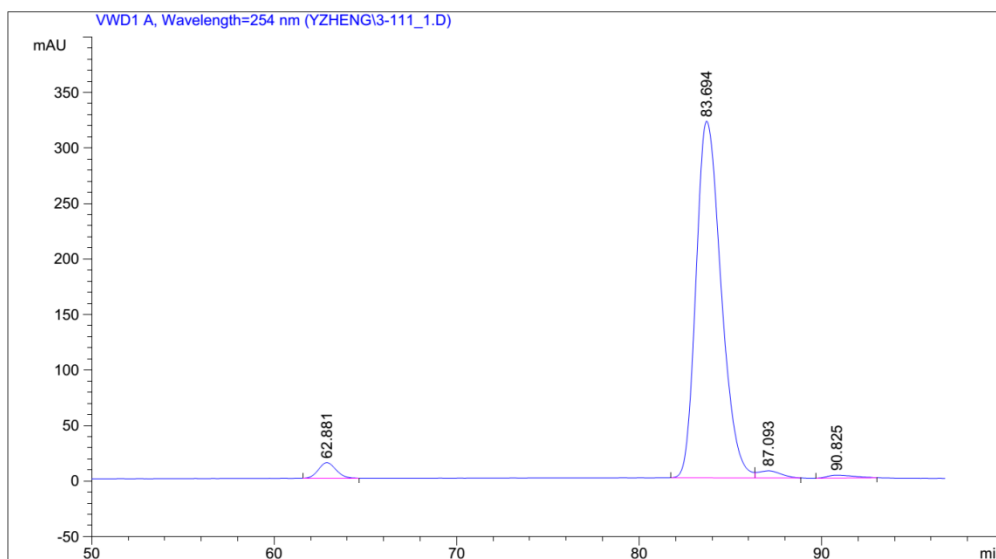

=====  
Area Percent Report  
=====

Sorted By : Signal  
Multiplier : 1.0000  
Dilution : 1.0000  
Use Multiplier & Dilution Factor with ISTDs

Signal 1: VWD1 A, Wavelength=254 nm

| Peak # | RetTime [min] | Type | Width [min] | Area mAU*s | Height [mAU] | Area %  |
|--------|---------------|------|-------------|------------|--------------|---------|
| 1      | 62.881        | BB   | 1.0241      | 947.42053  | 14.12772     | 2.9253  |
| 2      | 83.694        | BB   | 1.4483      | 3.06197e4  | 321.25366    | 94.5426 |
| 3      | 87.093        | BB   | 1.0888      | 557.07318  | 6.46186      | 1.7200  |
| 4      | 90.825        | BB   | 1.1914      | 263.00912  | 2.59781      | 0.8121  |

Totals : 3.23872e4 344.44105

=====  
\*\*\* End of Report \*\*\*

Instrument 1 10/4/2011 3:52:46 PM yang

Page 1 of 1

Data File C:\CHEM32\1\DATA\YZHENG\3-112\_1.D  
Sample Name: 3-22

=====  
Acq. Operator : yang  
Acq. Instrument : Instrument 1  
Injection Date : 10/3/2011 5:01:00 PM  
Acq. Method : C:\CHEM32\1\METHODS\YANG.M  
Last changed : 10/3/2011 4:37:38 PM by yang  
(modified after loading)  
Analysis Method : C:\CHEM32\1\METHODS\YANG.M  
Last changed : 10/4/2011 12:48:26 PM by yang  
(modified after loading)  
Sample Info : AD-H+AD, Hex:IPA = 97:3, 0.8 mL/min, 254 nm, 43 bar, Ri  
ght

Location : -

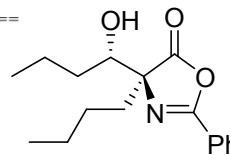

**ent-8bc**  
-92% ee, *anti/syn* = 97/3

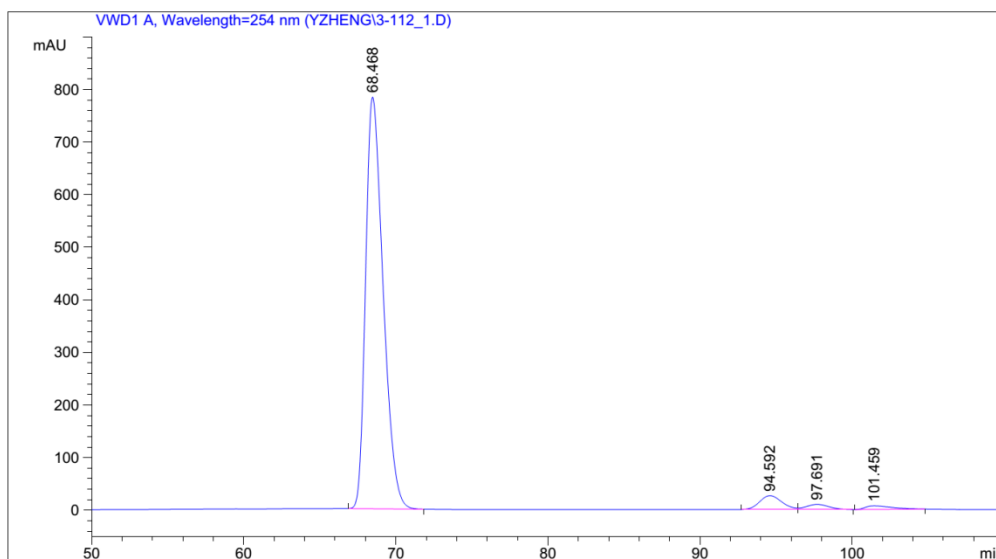

=====  
Area Percent Report  
=====

Sorted By : Signal  
Multiplier : 1.0000  
Dilution : 1.0000  
Use Multiplier & Dilution Factor with ISTDs

Signal 1: VWD1 A, Wavelength=254 nm

| Peak # | RetTime [min] | Type | Width [min] | Area mAU*s | Height [mAU] | Area %  |
|--------|---------------|------|-------------|------------|--------------|---------|
| 1      | 68.468        | BB   | 1.2534      | 6.26077e4  | 782.81177    | 93.2501 |
| 2      | 94.592        | BV   | 1.5157      | 2681.97754 | 26.33486     | 3.9946  |
| 3      | 97.691        | VB   | 1.3537      | 1016.94580 | 9.79685      | 1.5147  |
| 4      | 101.459       | BB   | 1.5890      | 832.90808  | 6.82155      | 1.2406  |

Totals : 6.71396e4 825.76503

=====  
\*\*\* End of Report \*\*\*

Instrument 1 10/4/2011 12:52:19 PM yang

Page 1 of 1

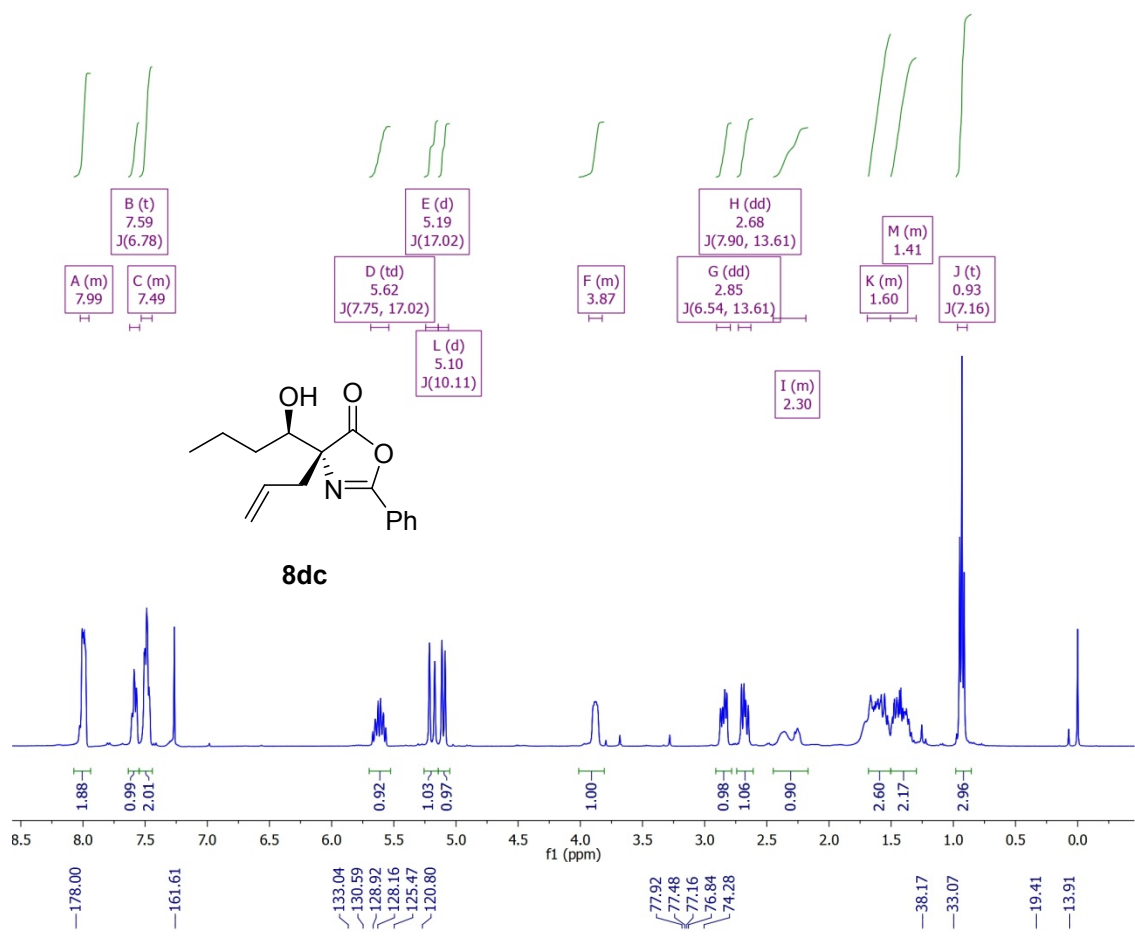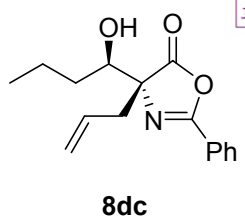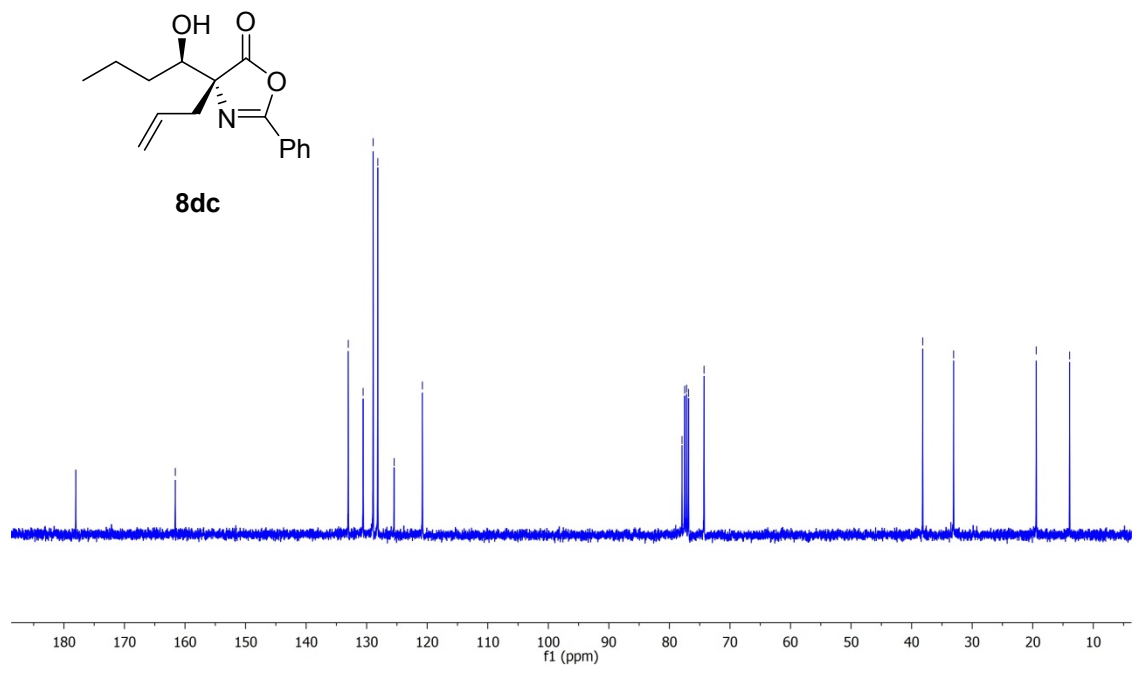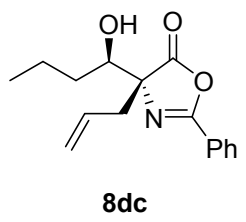

Data File C:\CHEM32\1\DATA\YZHENG\3-24RAC\_1.D  
Sample Name: 3-24rac

=====  
Acq. Operator : yang  
Acq. Instrument : Instrument 1 Location : -  
Injection Date : 6/28/2011 10:49:47 PM  
Acq. Method : C:\CHEM32\1\METHODS\METHOD-1\_LC.M  
Last changed : 4/2/2011 5:29:05 PM by jhl  
Analysis Method : C:\CHEM32\1\METHODS\WASH.M  
Last changed : 8/10/2011 11:23:50 AM by jhl  
(modified after loading)  
Sample Info : OJ-H, Hex:IPA = 97:3, 1 mL/min, 254 nm, 39 bar, Right

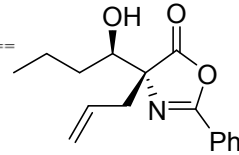

**8dc**  
**Racemic**

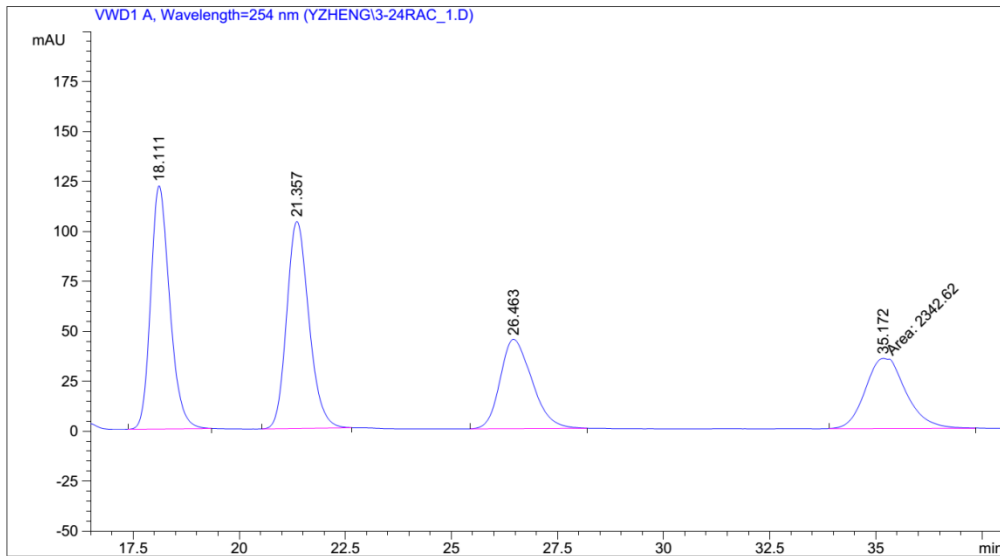

=====  
Area Percent Report  
=====

Sorted By : Signal  
Multiplier : 1.0000  
Dilution : 1.0000  
Use Multiplier & Dilution Factor with ISTDs

Signal 1: VWD1 A, Wavelength=254 nm

| Peak # | RetTime [min] | Type | Width [min] | Area mAU   | Height [mAU] | Area %  |
|--------|---------------|------|-------------|------------|--------------|---------|
| 1      | 18.111        | BB   | 0.4802      | 3796.21582 | 121.75442    | 31.0119 |
| 2      | 21.357        | BB   | 0.5592      | 3776.37964 | 103.59920    | 30.8499 |
| 3      | 26.463        | BB   | 0.7773      | 2325.93457 | 44.70980     | 19.0010 |
| 4      | 35.172        | MM   | 1.1125      | 2342.61719 | 35.09529     | 19.1372 |

Totals : 1.22411e4 305.15870

=====  
\*\*\* End of Report \*\*\*

Data File C:\CHEM32\1\DATA\YZHENG\3-23\_1.D  
Sample Name: 3-23

=====  
Acq. Operator : yang  
Acq. Instrument : Instrument 1  
Injection Date : 6/28/2011 11:44:45 PM  
Acq. Method : C:\CHEM32\1\METHODS\METHOD-1\_LC.M  
Last changed : 4/2/2011 5:29:05 PM by jhl  
Analysis Method : C:\CHEM32\1\METHODS\WASH.M  
Last changed : 8/10/2011 11:22:00 AM by jhl  
(modified after loading)  
Sample Info : OJ-H, Hex:IPA = 97:3, 1 mL/min, 254 nm, 39 bar, Right

Location : -

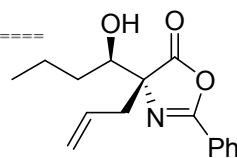

**8dc**

94% ee, *anti*/syn = 97.5/2.5

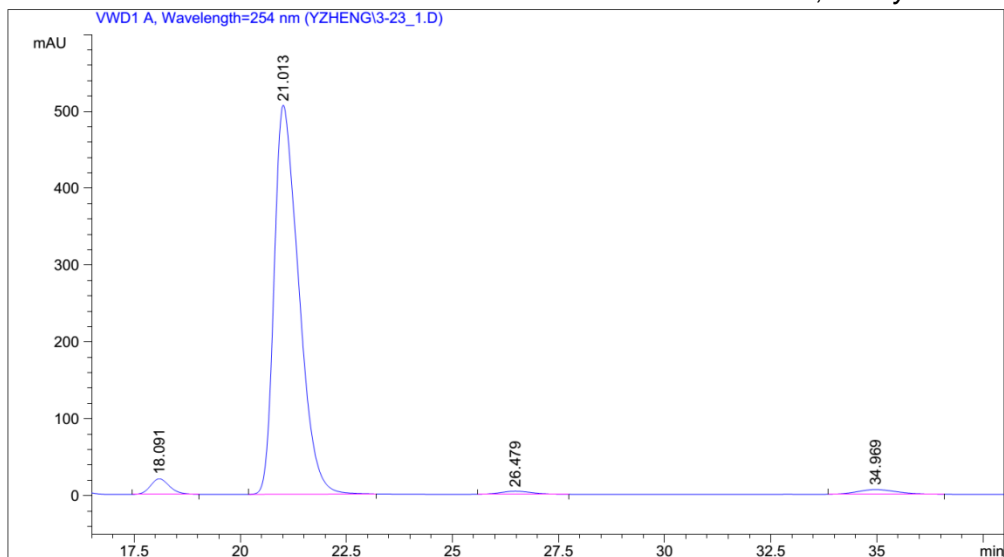

=====  
Area Percent Report  
=====

Sorted By : Signal  
Multiplier : 1.0000  
Dilution : 1.0000  
Use Multiplier & Dilution Factor with ISTDs

Signal 1: VWD1 A, Wavelength=254 nm

| Peak # | RetTime [min] | Type | Width [min] | Area mAU  | Area *s   | Height [mAU] | Area %  |
|--------|---------------|------|-------------|-----------|-----------|--------------|---------|
| 1      | 18.091        | BB   | 0.4825      | 631.86621 | 20.30002  | 2.9376       | 2.9376  |
| 2      | 21.013        | BB   | 0.5856      | 2.02909e4 | 506.16669 | 94.3347      | 94.3347 |
| 3      | 26.479        | BB   | 0.7396      | 197.53523 | 3.95765   | 0.9184       | 0.9184  |
| 4      | 34.969        | BB   | 0.8847      | 389.17010 | 6.14300   | 1.8093       | 1.8093  |

Totals : 2.15094e4 536.56736

=====  
\*\*\* End of Report \*\*\*

Data File C:\CHEM32\1\DATA\YZHENG\3-96.D  
Sample Name: 3-96

=====  
Acq. Operator : yang  
Acq. Instrument : Instrument 1  
Injection Date : 9/14/2011 4:14:53 PM  
Acq. Method : C:\CHEM32\1\METHODS\YANG.M  
Last changed : 9/14/2011 3:30:28 PM by yang  
Analysis Method : C:\CHEM32\1\METHODS\YANG.M  
Last changed : 9/23/2011 3:13:05 PM by yang  
(modified after loading)  
Sample Info : OJ-H, Hex:IPA = 97:3, 1 mL/min, 254 nm, 39 bar, Right

Location : -

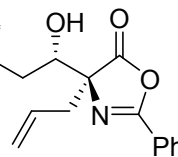

**8dc-ent**

-92% ee, *anti*/*syn* = 97/3

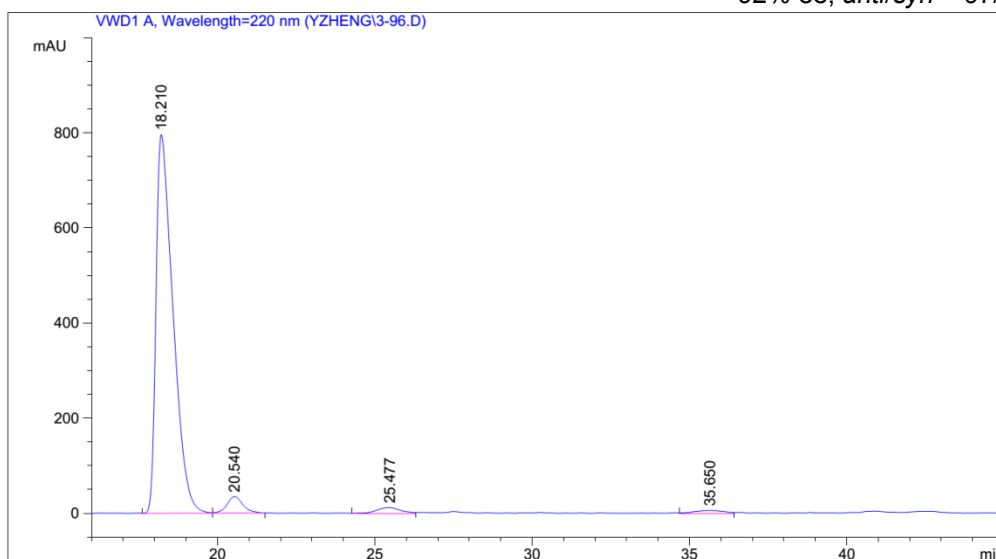

=====  
Area Percent Report  
=====

Sorted By : Signal  
Multiplier : 1.0000  
Dilution : 1.0000  
Use Multiplier & Dilution Factor with ISTDs

Signal 1: VWD1 A, Wavelength=220 nm

| Peak # | RetTime [min] | Type | Width [min] | Area mAU*s | Height [mAU] | Area %  |
|--------|---------------|------|-------------|------------|--------------|---------|
| 1      | 18.210        | VV   | 0.5513      | 2.97630e4  | 795.91199    | 92.9582 |
| 2      | 20.540        | VB   | 0.5288      | 1218.60913 | 34.97573     | 3.8061  |
| 3      | 25.477        | VV   | 0.8019      | 641.35376  | 11.95811     | 2.0031  |
| 4      | 35.650        | VV   | 0.8521      | 394.65192  | 5.97526      | 1.2326  |

Totals : 3.20176e4 848.82110

=====  
\*\*\* End of Report \*\*\*

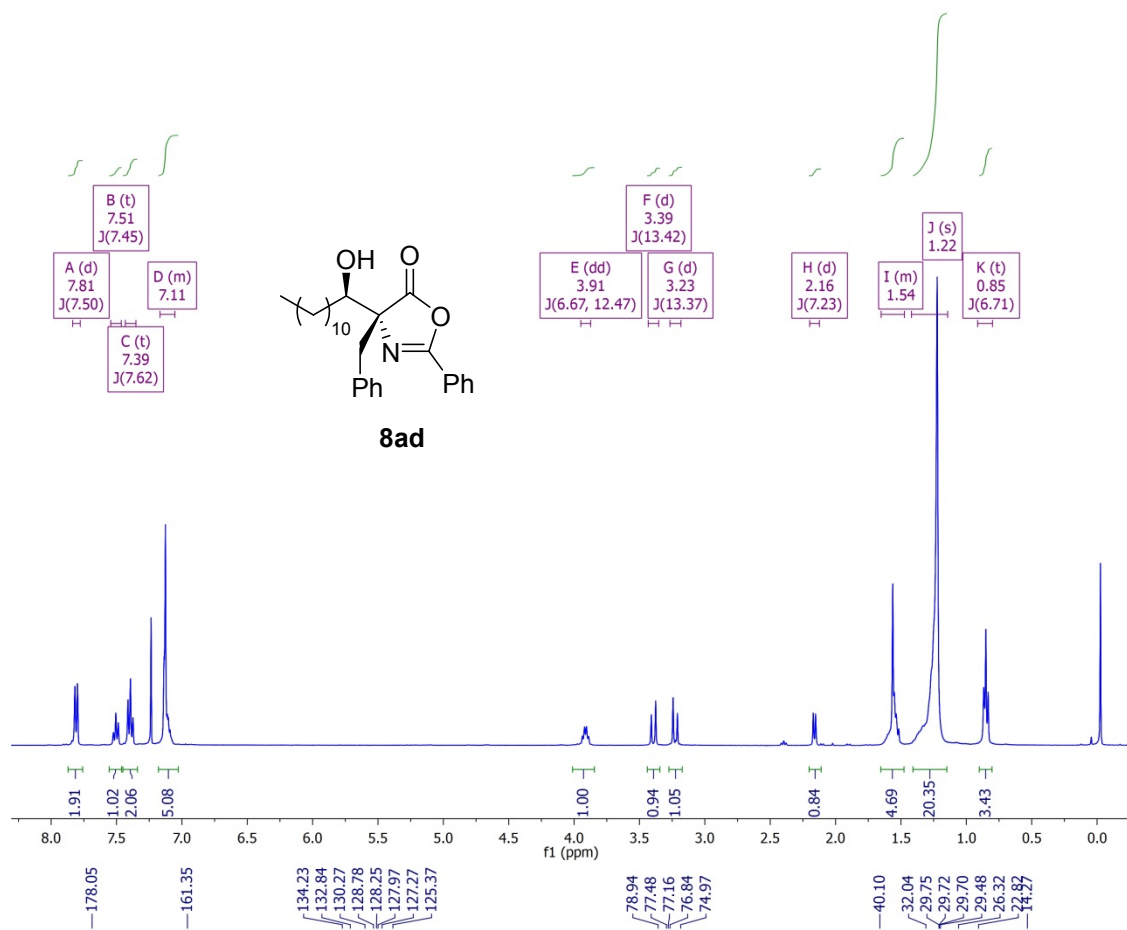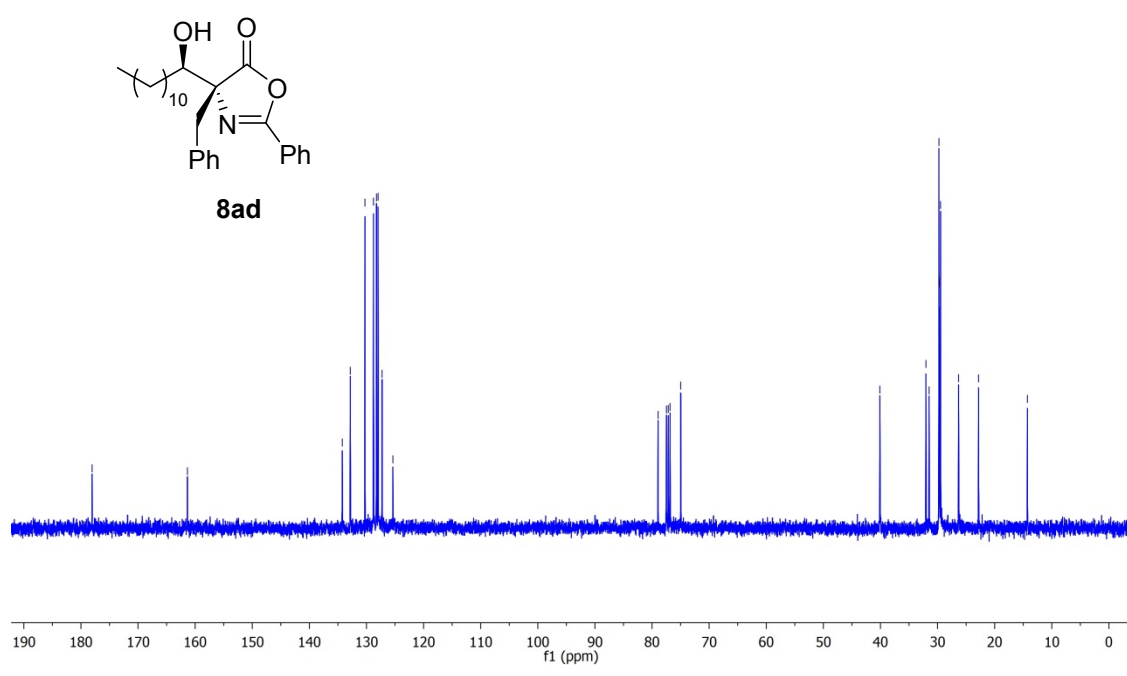



Data File C:\CHEM32\1\DATA\YZHENG\3-65RAC\_3.D  
Sample Name: 3-65rac

=====  
Acq. Operator : yang  
Acq. Instrument : Instrument 1  
Injection Date : 8/3/2011 4:49:15 PM  
Acq. Method : C:\CHEM32\1\METHODS\METHOD-1\_LC.M  
Last changed : 8/3/2011 4:22:01 PM by yang  
(modified after loading)  
Analysis Method : C:\CHEM32\1\METHODS\WASH.M  
Last changed : 8/10/2011 11:17:35 AM by jhl  
(modified after loading)  
Sample Info : AS-H, Hex:IPA = 96.5:3.5, 1.0 mL/min, 254 nm, 44 bar, R  
ight

Location : -

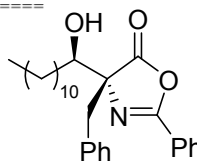

**8ad**  
**Racemic**

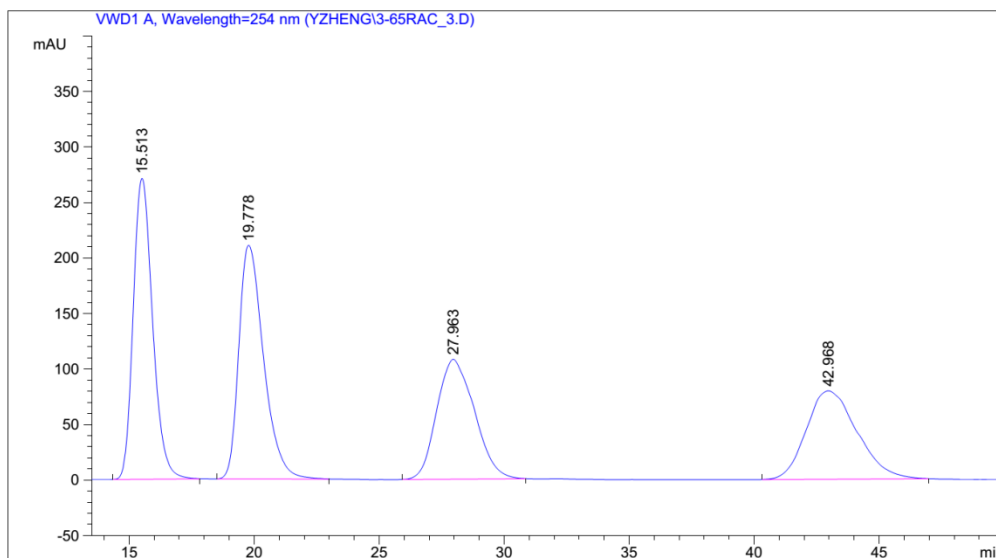

=====  
Area Percent Report  
=====

Sorted By : Signal  
Multiplier : 1.0000  
Dilution : 1.0000  
Use Multiplier & Dilution Factor with ISTDs

Signal 1: VWD1 A, Wavelength=254 nm

| Peak # | RetTime [min] | Type | Width [min] | Area mAU*s | Height [mAU] | Area %  |
|--------|---------------|------|-------------|------------|--------------|---------|
| 1      | 15.513        | BB   | 0.8414      | 1.45775e4  | 271.07748    | 28.2494 |
| 2      | 19.778        | BB   | 1.0537      | 1.44936e4  | 210.49646    | 28.0867 |
| 3      | 27.963        | BB   | 1.5207      | 1.12952e4  | 107.95037    | 21.8887 |
| 4      | 42.968        | BB   | 1.9230      | 1.12367e4  | 79.62708     | 21.7752 |

Totals : 5.16030e4 669.15139

=====  
\*\*\* End of Report \*\*\*

Instrument 1 8/10/2011 11:17:40 AM jhl

Page 1 of 1

Data File C:\CHEM32\1\DATA\YZHENG\3-64.D  
Sample Name: 3-64

=====  
Acq. Operator : yang  
Acq. Instrument : Instrument 1  
Injection Date : 8/3/2011 10:57:06 AM  
Acq. Method : C:\CHEM32\1\METHODS\METHOD-1\_LC.M  
Last changed : 8/2/2011 5:34:32 PM by yang  
(modified after loading)  
Analysis Method : C:\CHEM32\1\METHODS\WASH.M  
Last changed : 8/10/2011 11:16:24 AM by jhl  
(modified after loading)  
Sample Info : AS-H, Hex:IPA = 96.5:3.5, 1.0 mL/min, 254 nm, 44 bar, R  
ight

Location : -

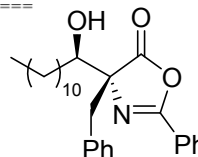

**8ad**

92% ee, anti/syn = 95.5/4.5

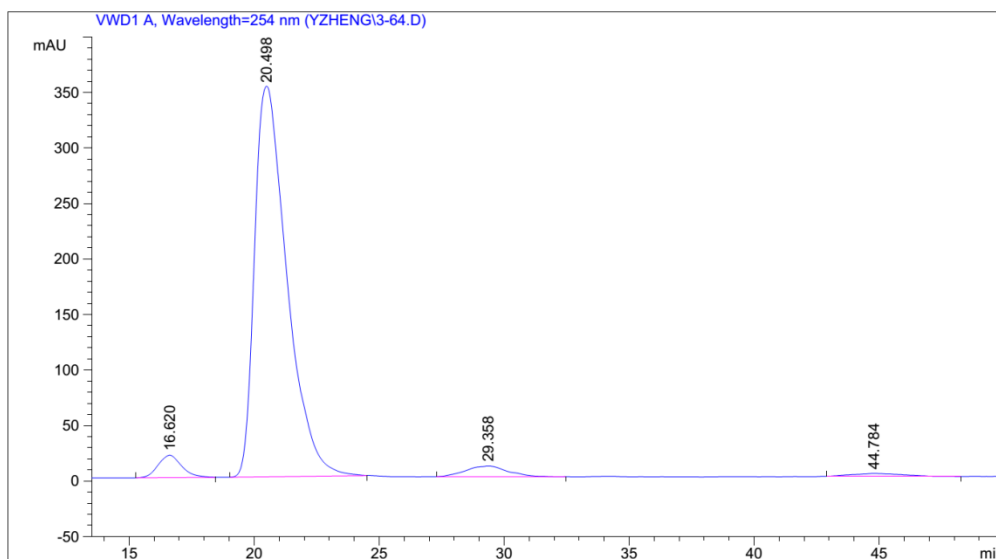

=====  
Area Percent Report  
=====

Sorted By : Signal  
Multiplier : 1.0000  
Dilution : 1.0000  
Use Multiplier & Dilution Factor with ISTDs

Signal 1: VWD1 A, Wavelength=254 nm

| Peak # | RetTime [min] | Type | Width [min] | Area mAU*s | Height [mAU] | Area %  |
|--------|---------------|------|-------------|------------|--------------|---------|
| 1      | 16.620        | BB   | 1.0042      | 1316.72168 | 20.18391     | 3.8245  |
| 2      | 20.498        | BB   | 1.3238      | 3.15790e4  | 351.84460    | 91.7241 |
| 3      | 29.358        | BB   | 1.5167      | 1124.23438 | 9.63799      | 3.2654  |
| 4      | 44.784        | BB   | 1.7626      | 408.27173  | 2.79471      | 1.1859  |

Totals : 3.44282e4 384.46122

=====  
\*\*\* End of Report \*\*\*

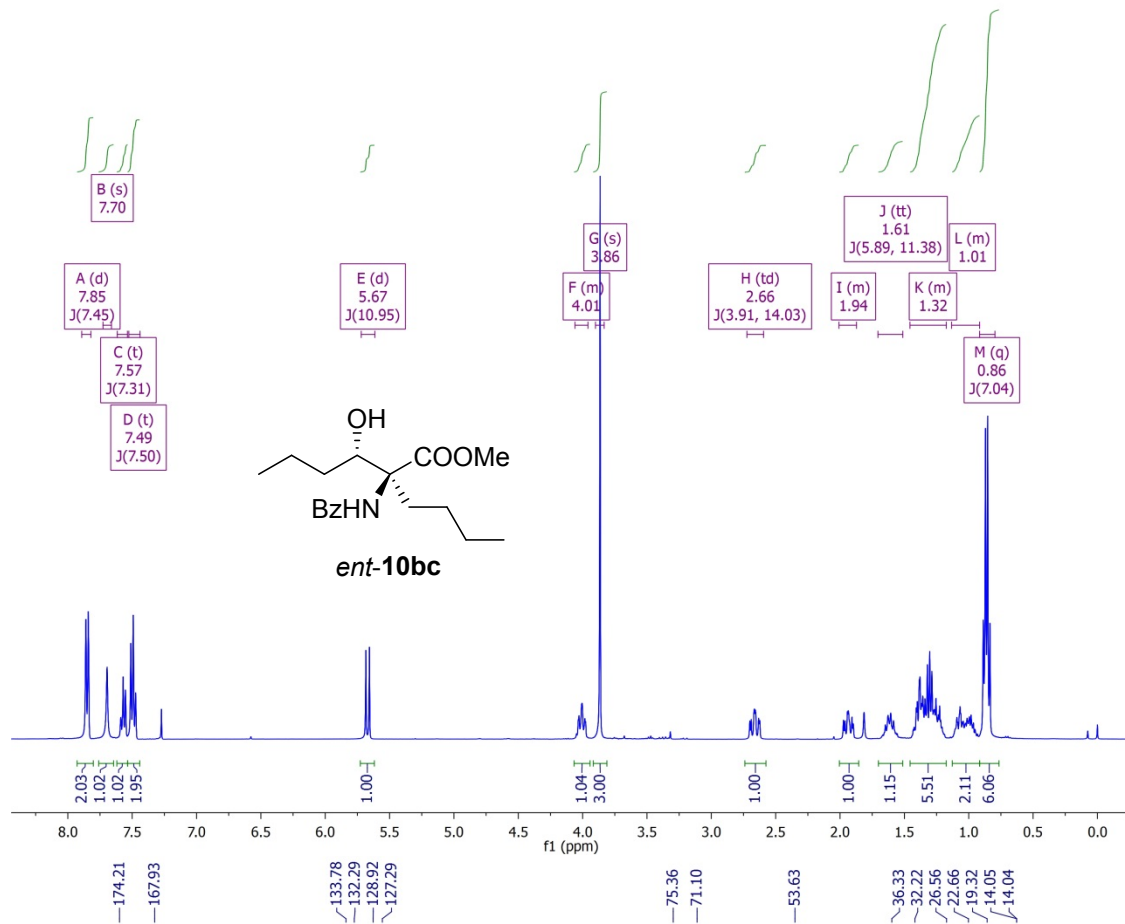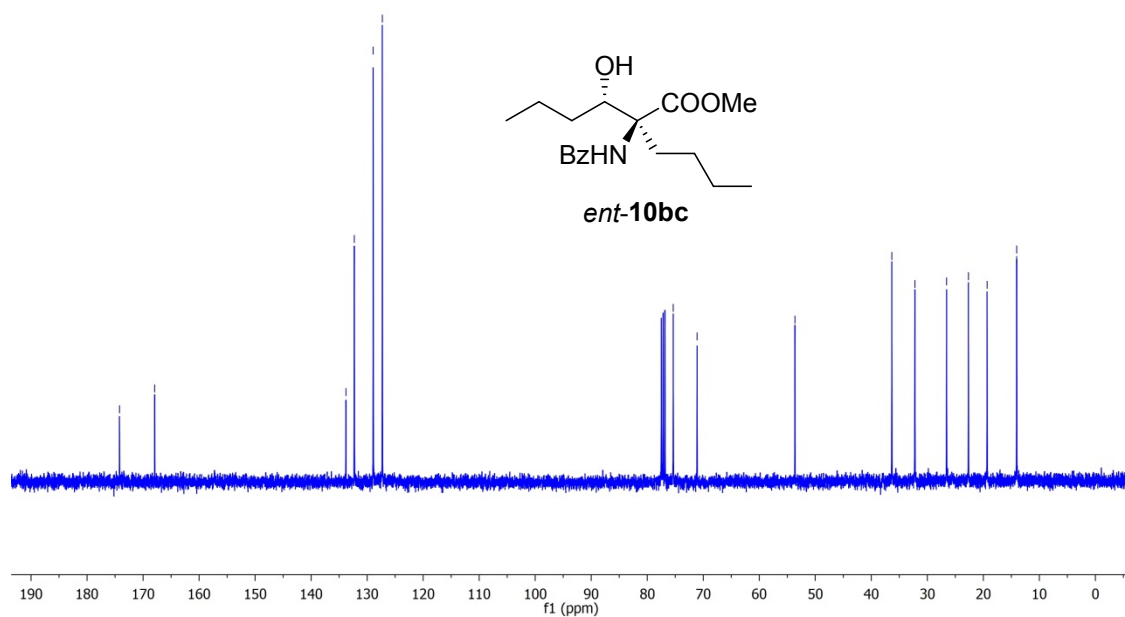

Data File C:\CHEM32\1\DATA\YZHENG\3-135\_1.D  
Sample Name: 3-135rac

=====  
Acq. Operator : yang  
Acq. Instrument : Instrument 1 Location : -  
Injection Date : 10/20/2011 11:34:21 AM  
Acq. Method : C:\CHEM32\1\METHODS\YANG.M  
Last changed : 10/20/2011 11:08:32 AM by yang  
(modified after loading)  
Analysis Method : C:\CHEM32\1\METHODS\WASH.M  
Last changed : 10/26/2011 10:41:01 AM by jhl  
(modified after loading)  
Sample Info : AD-H, Hex:IPA = 90:10, 1.0 mL/min, 254 nm, 42 bar, Right  
t

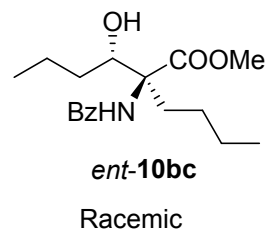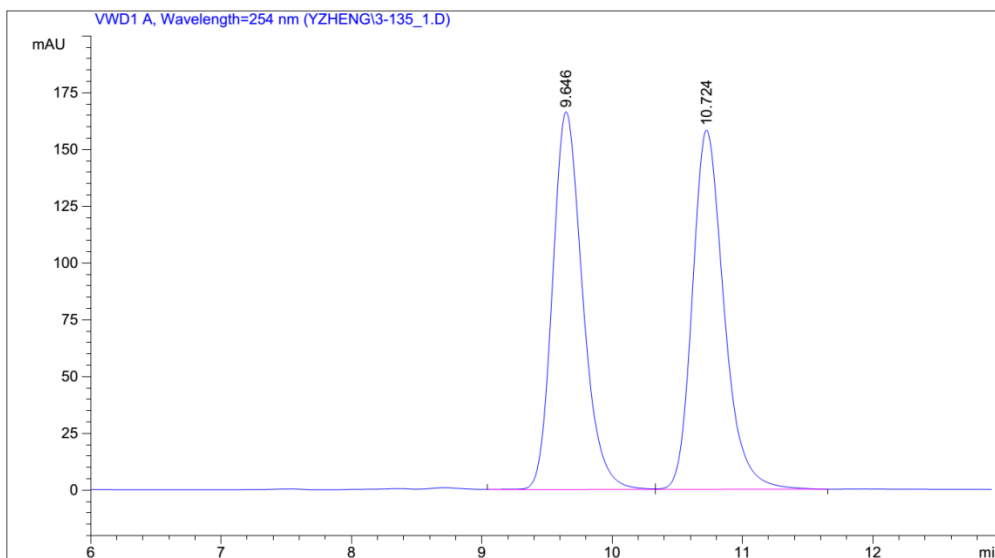

=====  
Area Percent Report  
=====

Sorted By : Signal  
Multiplier : 1.0000  
Dilution : 1.0000  
Use Multiplier & Dilution Factor with ISTDs

Signal 1: VWD1 A, Wavelength=254 nm

| Peak # | RetTime [min] | Type | Width [min] | Area mAU*s | Height [mAU] | Area %  |
|--------|---------------|------|-------------|------------|--------------|---------|
| 1      | 9.646         | VV   | 0.2451      | 2663.87866 | 166.34001    | 50.0445 |
| 2      | 10.724        | VB   | 0.2572      | 2659.14600 | 158.23003    | 49.9555 |

Totals : 5323.02466 324.57004

=====  
\*\*\* End of Report \*\*\*

Data File C:\CHEM32\1\DATA\YZHENG\3-128\_1.D  
Sample Name: 3-128

```
=====
Acq. Operator   : yang
Acq. Instrument : Instrument 1
Injection Date  : 10/20/2011 12:12:47 PM
Acq. Method     : C:\CHEM32\1\METHODS\YANG.M
Last changed    : 10/20/2011 11:08:32 AM by yang
                  (modified after loading)
Analysis Method : C:\CHEM32\1\METHODS\WASH.M
Last changed    : 10/26/2011 10:39:21 AM by jhl
                  (modified after loading)
Sample Info     : AD-H, Hex:IPA = 90:10, 1.0 mL/min, 254 nm, 42 bar, Right
                  t
=====
```

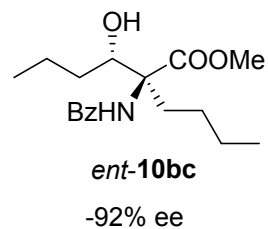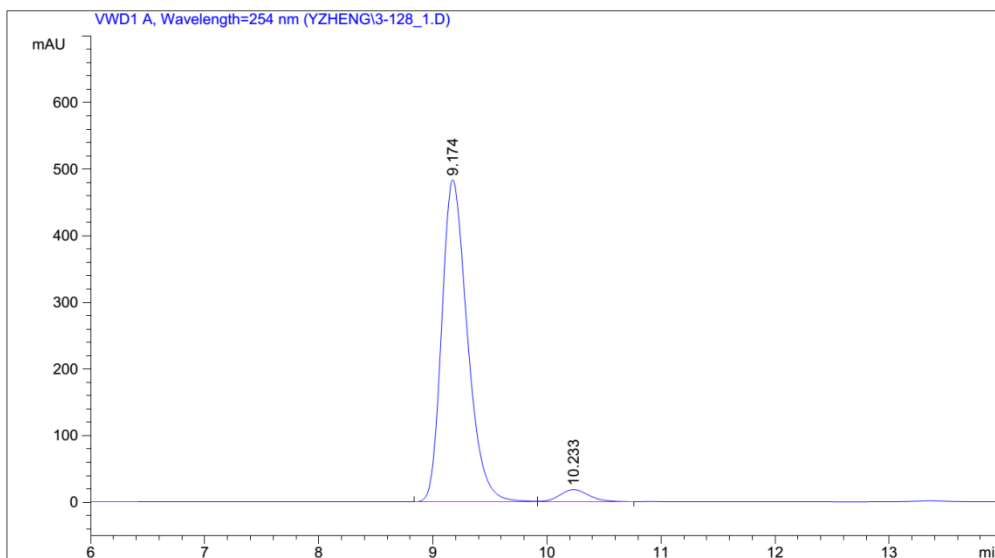

=====  
Area Percent Report  
=====

Sorted By : Signal  
Multiplier : 1.0000  
Dilution : 1.0000  
Use Multiplier & Dilution Factor with ISTDs

Signal 1: VWD1 A, Wavelength=254 nm

| Peak # | RetTime [min] | Type | Width [min] | Area mAU*s | Height [mAU] | Area %  |
|--------|---------------|------|-------------|------------|--------------|---------|
| 1      | 9.174         | BV   | 0.2400      | 7529.78955 | 483.25226    | 95.9212 |
| 2      | 10.233        | VB   | 0.2699      | 320.18448  | 18.27895     | 4.0788  |

Totals : 7849.97403 501.53121

=====  
\*\*\* End of Report \*\*\*

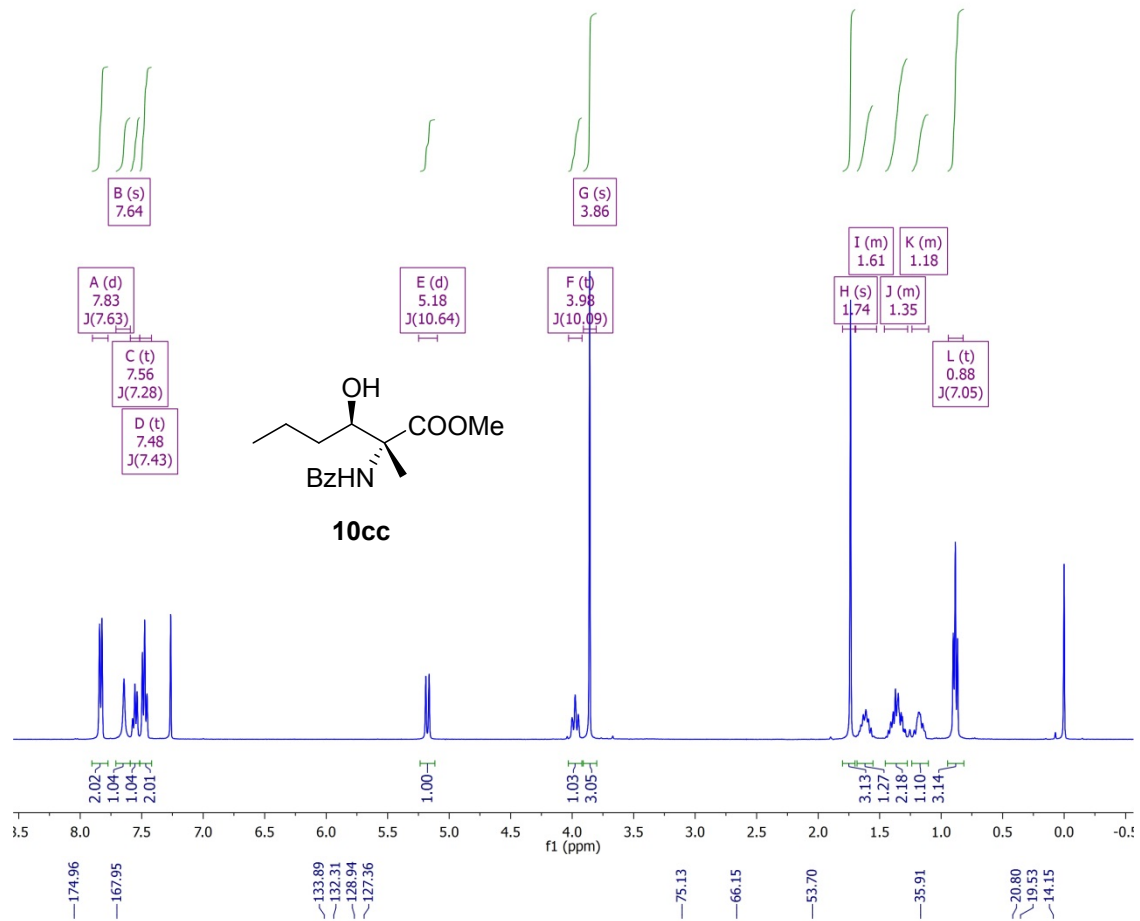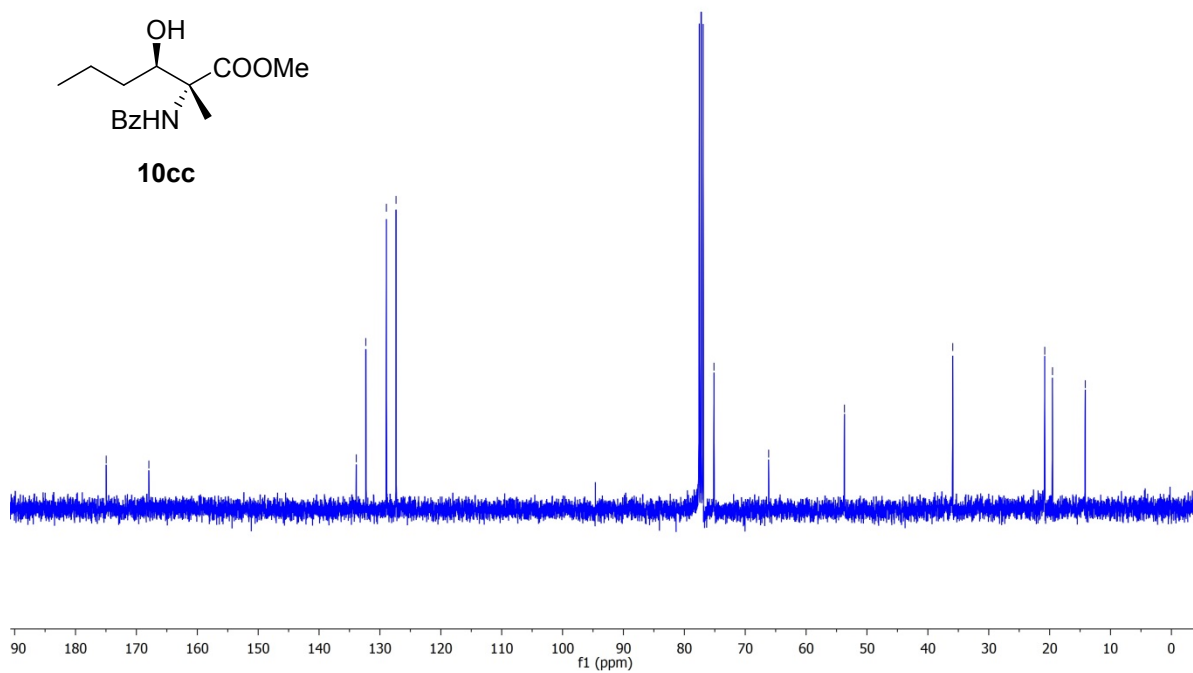

Data File C:\CHEM32\1\DATA\YZHENG\3-150U\_1.D  
Sample Name: 3-150U

=====  
Acq. Operator : yang  
Acq. Instrument : Instrument 1 Location : -  
Injection Date : 2/22/2012 10:59:30 AM  
Acq. Method : C:\CHEM32\1\METHODS\YANG.M  
Last changed : 2/22/2012 10:21:20 AM by yang  
(modified after loading)  
Analysis Method : C:\CHEM32\1\METHODS\YANG.M  
Last changed : 2/22/2012 12:36:15 PM by yang  
(modified after loading)  
Sample Info : AD-H, Hex:IPA = 90:10, 1.0 mL/min, 254 nm, 41 bar, Right

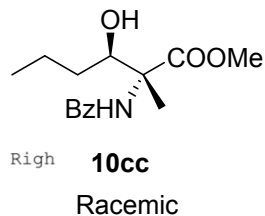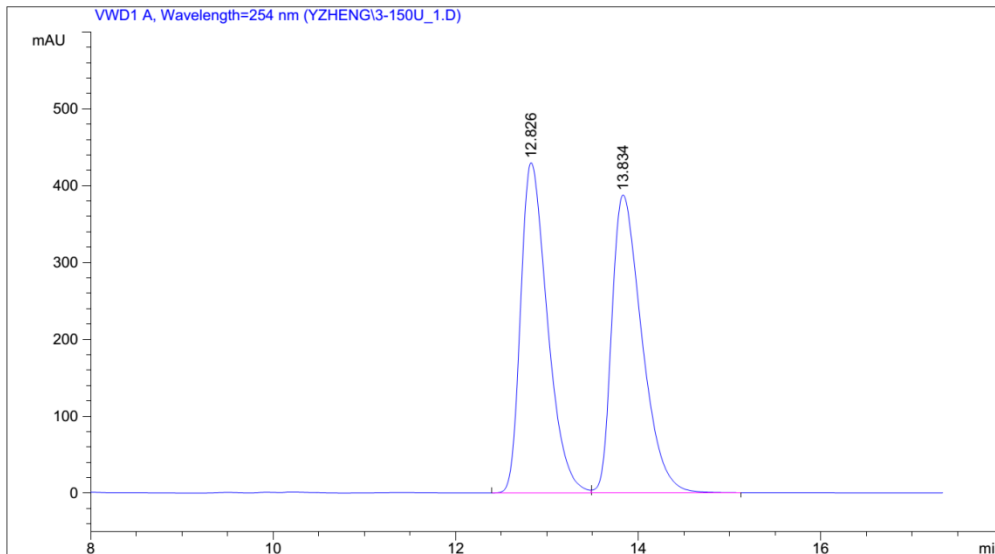

=====  
Area Percent Report  
=====

Sorted By : Signal  
Multiplier : 1.0000  
Dilution : 1.0000  
Use Multiplier & Dilution Factor with ISTDs

Signal 1: VWD1 A, Wavelength=254 nm

| Peak # | RetTime [min] | Type | Width [min] | Area mAU   | Height [mAU] | Area %  |
|--------|---------------|------|-------------|------------|--------------|---------|
| 1      | 12.826        | BV   | 0.3132      | 8744.77539 | 429.55450    | 49.7204 |
| 2      | 13.834        | VB   | 0.3506      | 8843.12598 | 387.57666    | 50.2796 |

Totals : 1.75879e4 817.13116

=====  
\*\*\* End of Report \*\*\*

Data File C:\CHEM32\1\DATA\YZHENG\3-153\_1.D  
Sample Name: 3-153

=====  
Acq. Operator : yang  
Acq. Instrument : Instrument 1 Location : -  
Injection Date : 2/22/2012 11:19:36 AM  
Acq. Method : C:\CHEM32\1\METHODS\YANG.M  
Last changed : 2/22/2012 10:21:20 AM by yang  
(modified after loading)  
Analysis Method : C:\CHEM32\1\METHODS\YANG.M  
Last changed : 2/22/2012 12:35:10 PM by yang  
(modified after loading)  
Sample Info : AD-H, Hex:IPA = 90:10, 1.0 mL/min, 254 nm, 41 bar, Right

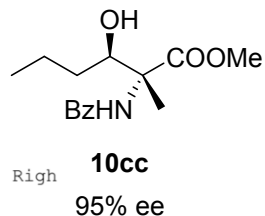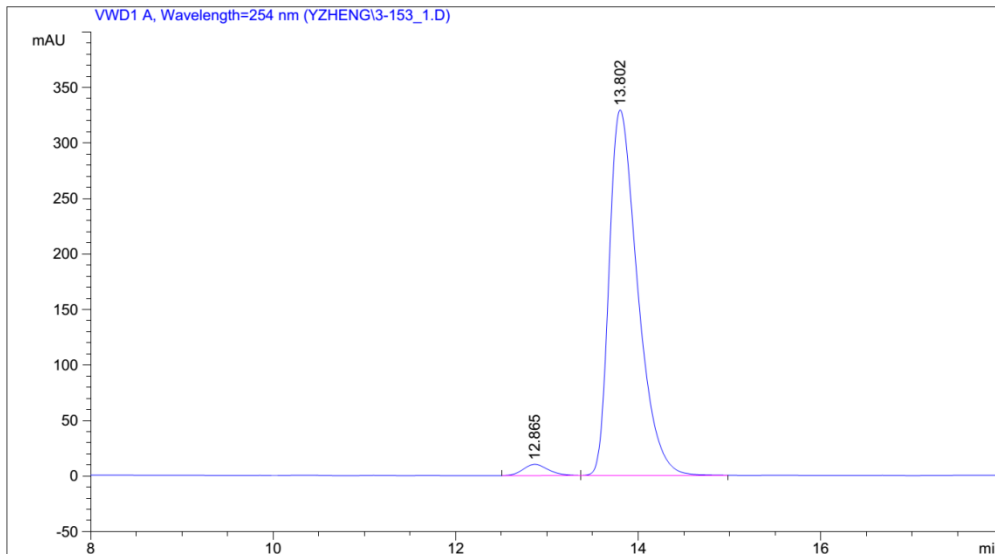

=====  
Area Percent Report  
=====

Sorted By : Signal  
Multiplier : 1.0000  
Dilution : 1.0000  
Use Multiplier & Dilution Factor with ISTDs

Signal 1: VWD1 A, Wavelength=254 nm

| Peak # | RetTime [min] | Type | Width [min] | Area [mAU*s] | Height [mAU] | Area %  |
|--------|---------------|------|-------------|--------------|--------------|---------|
| 1      | 12.865        | BV   | 0.2930      | 194.25142    | 10.15565     | 2.6504  |
| 2      | 13.802        | VB   | 0.3328      | 7134.79004   | 329.33212    | 97.3496 |

Totals : 7329.04146 339.48777

=====  
\*\*\* End of Report \*\*\*  
=====



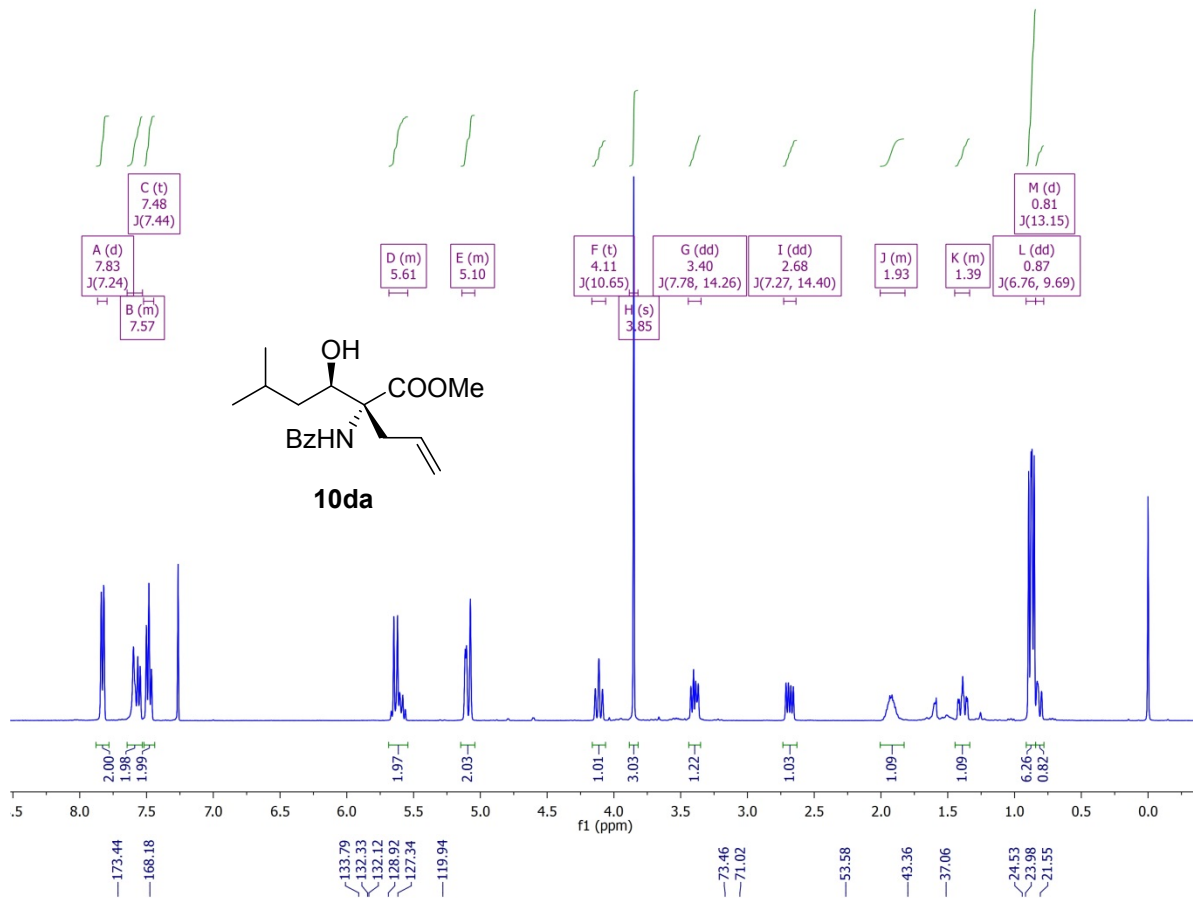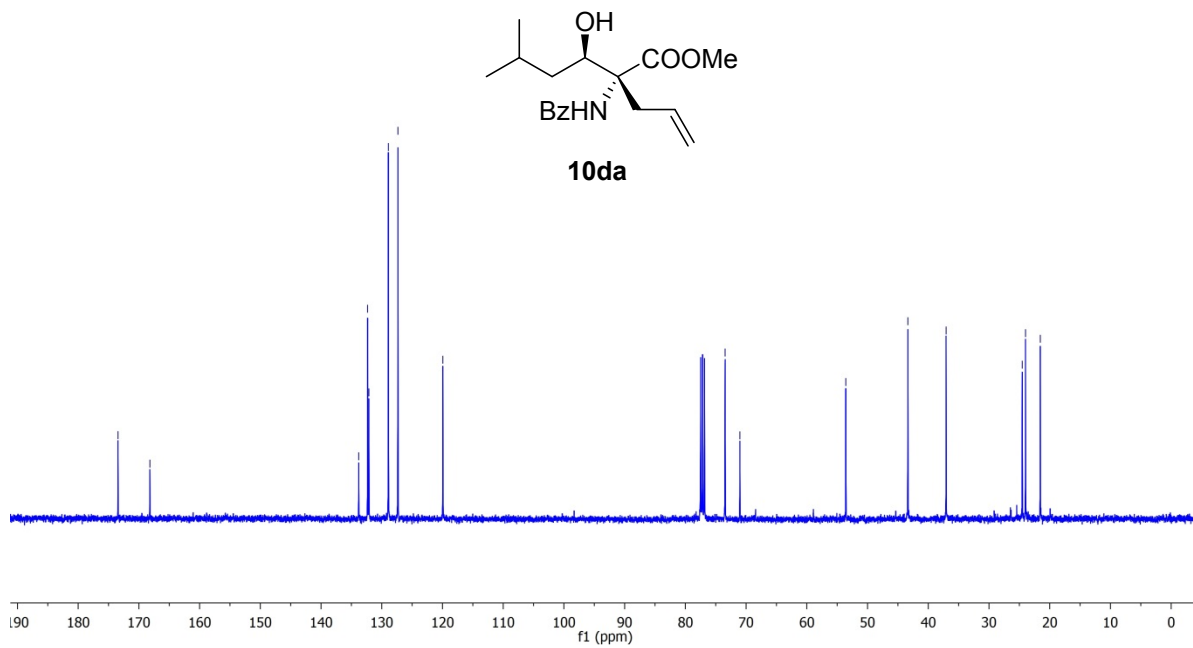

Data File C:\CHEM32\1\DATA\YZHENG\4-22U\_1.D  
Sample Name: 4-22U

=====  
Acq. Operator : yang  
Acq. Instrument : Instrument 1  
Injection Date : 2/21/2012 4:31:25 PM  
Acq. Method : C:\CHEM32\1\METHODS\YANG.M  
Last changed : 2/21/2012 3:23:10 PM by jhl  
(modified after loading)  
Analysis Method : C:\CHEM32\1\METHODS\YANG.M  
Last changed : 2/22/2012 12:37:27 PM by yang  
(modified after loading)  
Sample Info : AD-H, Hex:IPA = 90:10, 1.0 mL/min, 254 nm, 41 bar, Right  
t

Location : -

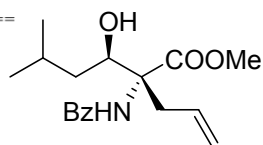

10da

Racemic

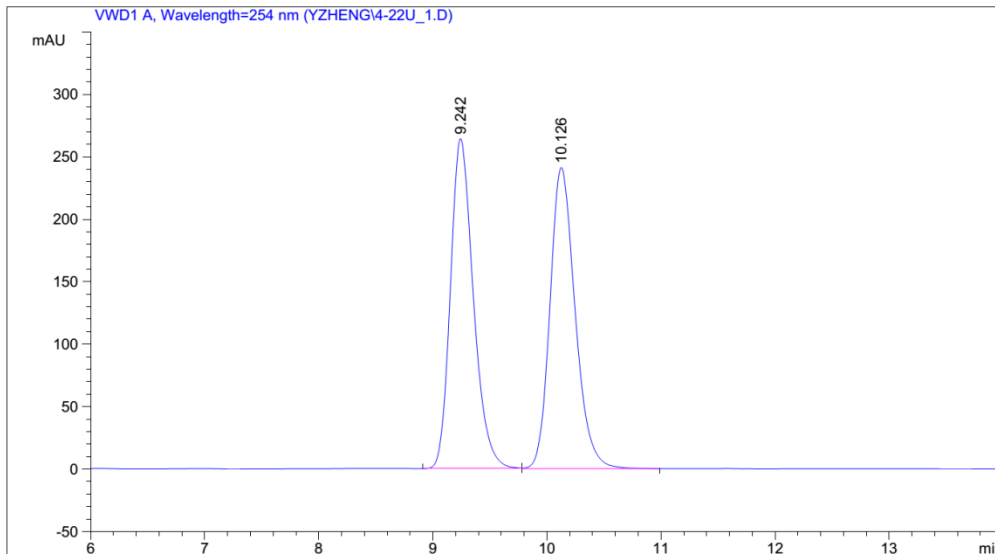

=====  
Area Percent Report  
=====

Sorted By : Signal  
Multiplier : 1.0000  
Dilution : 1.0000  
Use Multiplier & Dilution Factor with ISTDs

Signal 1: VWD1 A, Wavelength=254 nm

| Peak # | RetTime [min] | Type | Width [min] | Area mAU   | Area *s   | Height [mAU] | Area % |
|--------|---------------|------|-------------|------------|-----------|--------------|--------|
| 1      | 9.242         | VV   | 0.2142      | 3697.71021 | 264.33917 | 50.0371      |        |
| 2      | 10.126        | VB   | 0.2354      | 3692.22241 | 241.17551 | 49.9629      |        |

Totals : 7389.93262 505.51468

=====  
\*\*\* End of Report \*\*\*  
=====

Data File C:\CHEM32\1\DATA\YZHENG\4-21\_1.D  
Sample Name: 4-22U

=====  
Acq. Operator : yang  
Acq. Instrument : Instrument 1  
Injection Date : 2/21/2012 4:48:08 PM  
Acq. Method : C:\CHEM32\1\METHODS\YANG.M  
Last changed : 2/21/2012 3:23:10 PM by jhl  
(modified after loading)  
Analysis Method : C:\CHEM32\1\METHODS\YANG.M  
Last changed : 2/22/2012 12:38:09 PM by yang  
(modified after loading)  
Sample Info : AD-H, Hex:IPA = 90:10, 1.0 mL/min, 254 nm, 41 bar, Right  
t

Location : -

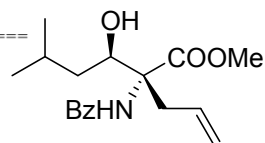

**10da**

**95% ee**

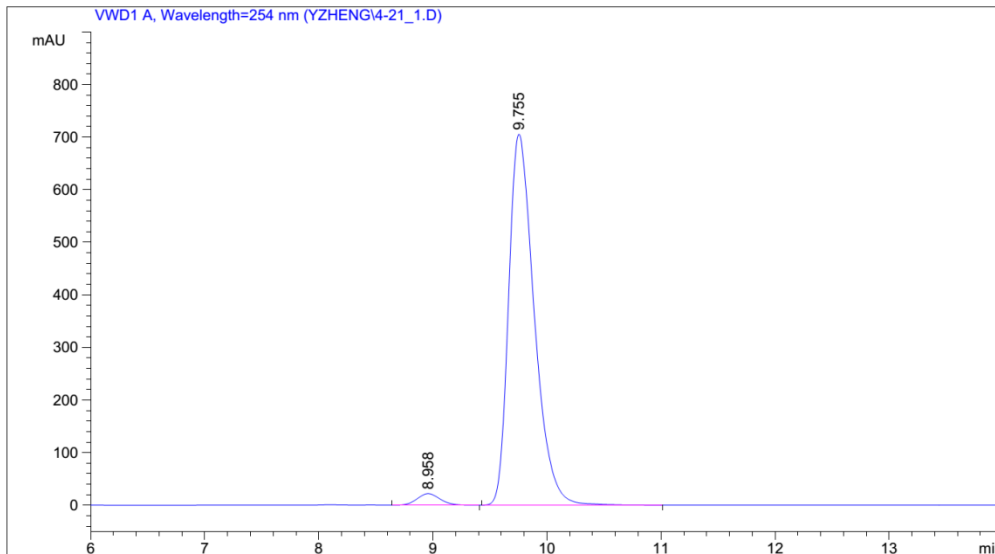

=====  
Area Percent Report  
=====

Sorted By : Signal  
Multiplier : 1.0000  
Dilution : 1.0000  
Use Multiplier & Dilution Factor with ISTDs

Signal 1: VWD1 A, Wavelength=254 nm

| Peak # | RetTime [min] | Type | Width [min] | Area mAU*s | Height [mAU] | Area %  |
|--------|---------------|------|-------------|------------|--------------|---------|
| 1      | 8.958         | VB   | 0.2151      | 306.92242  | 22.00724     | 2.7158  |
| 2      | 9.755         | BB   | 0.2401      | 1.09945e4  | 705.41644    | 97.2842 |

Totals : 1.13014e4 727.42368

=====  
\*\*\* End of Report \*\*\*

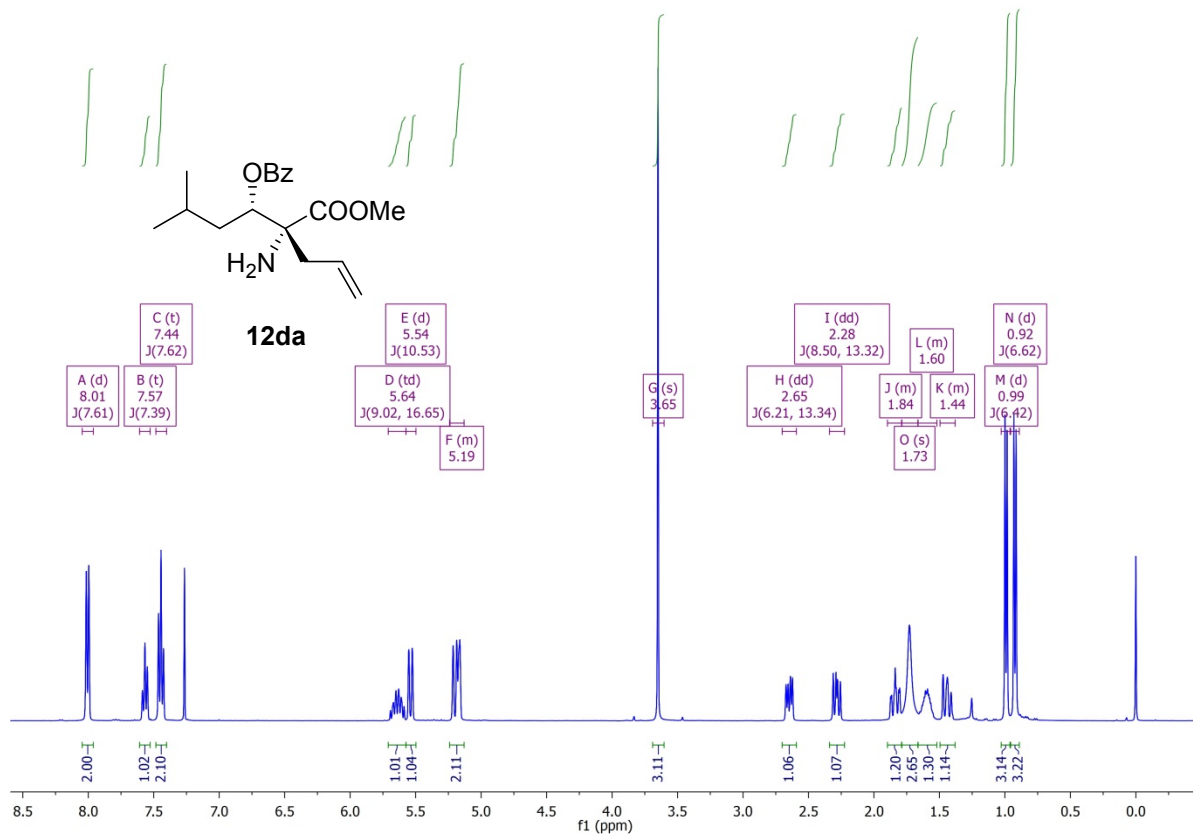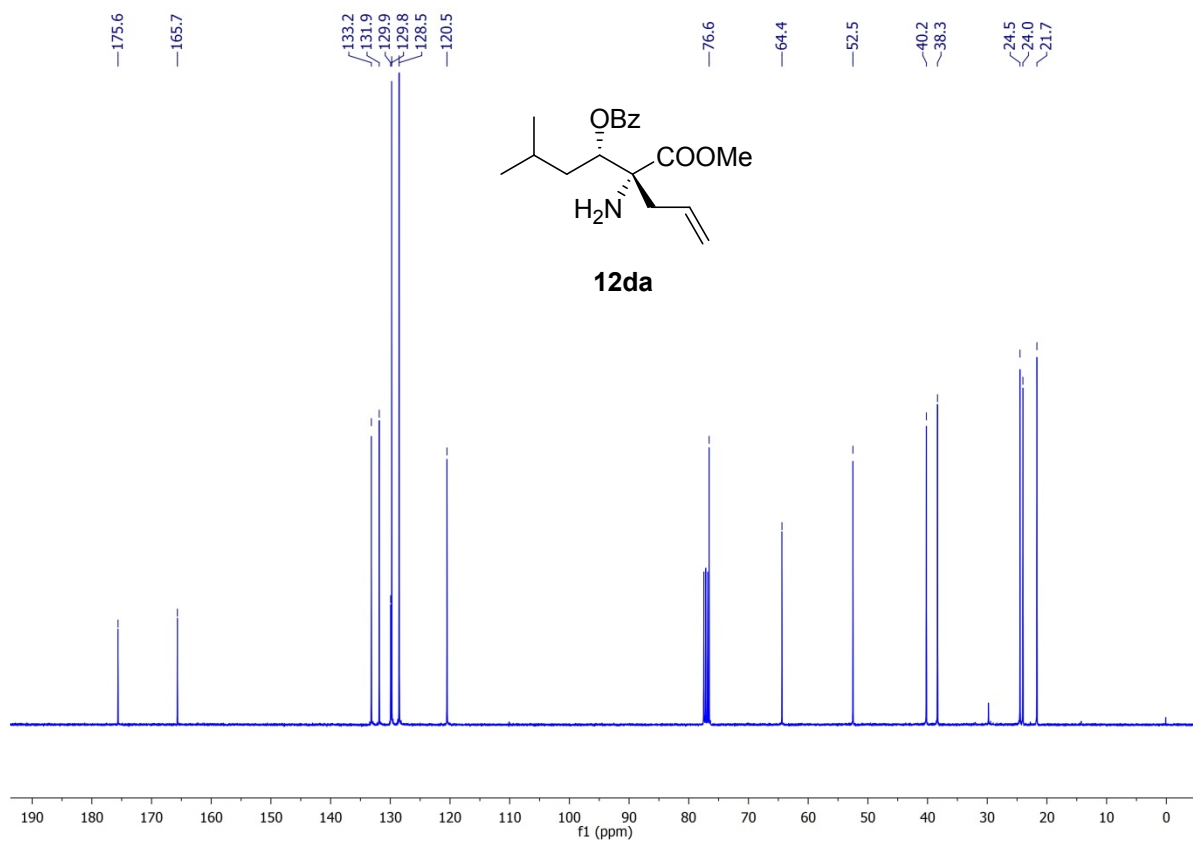

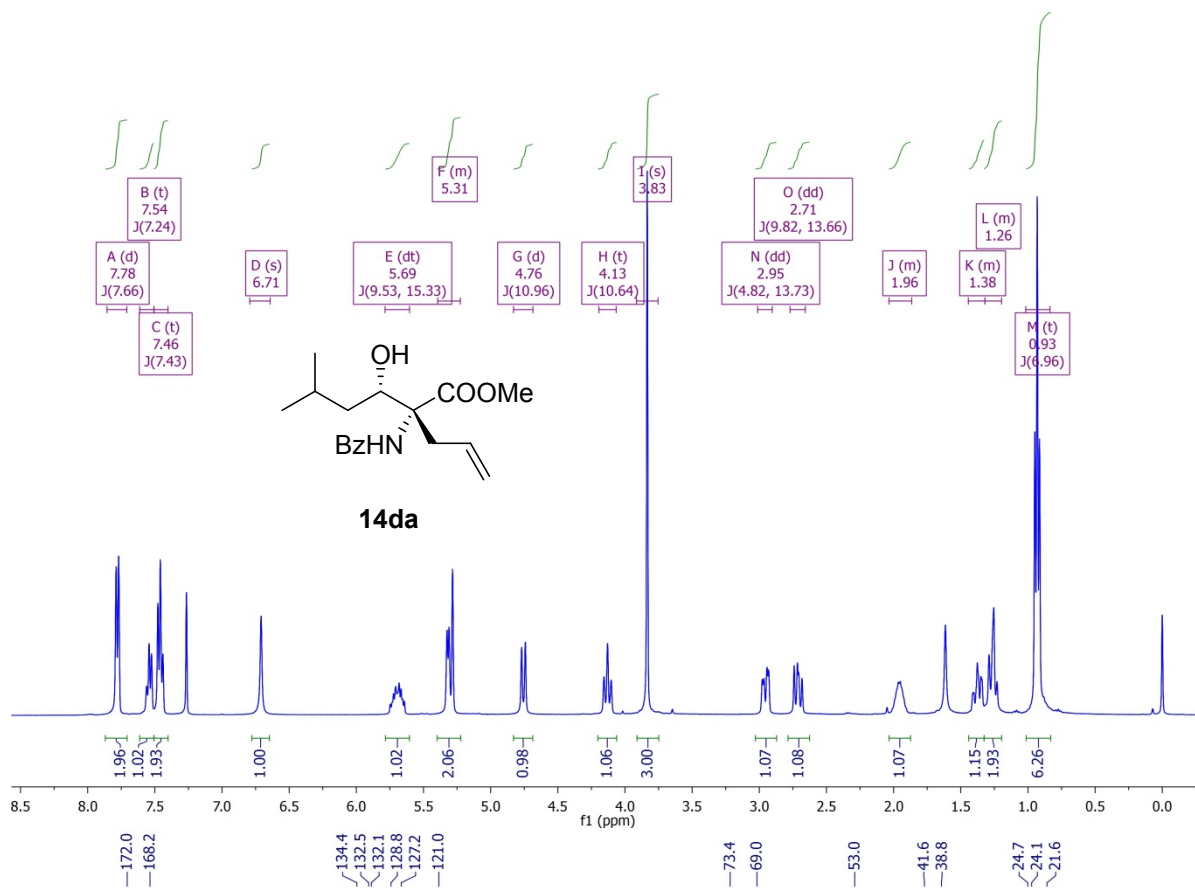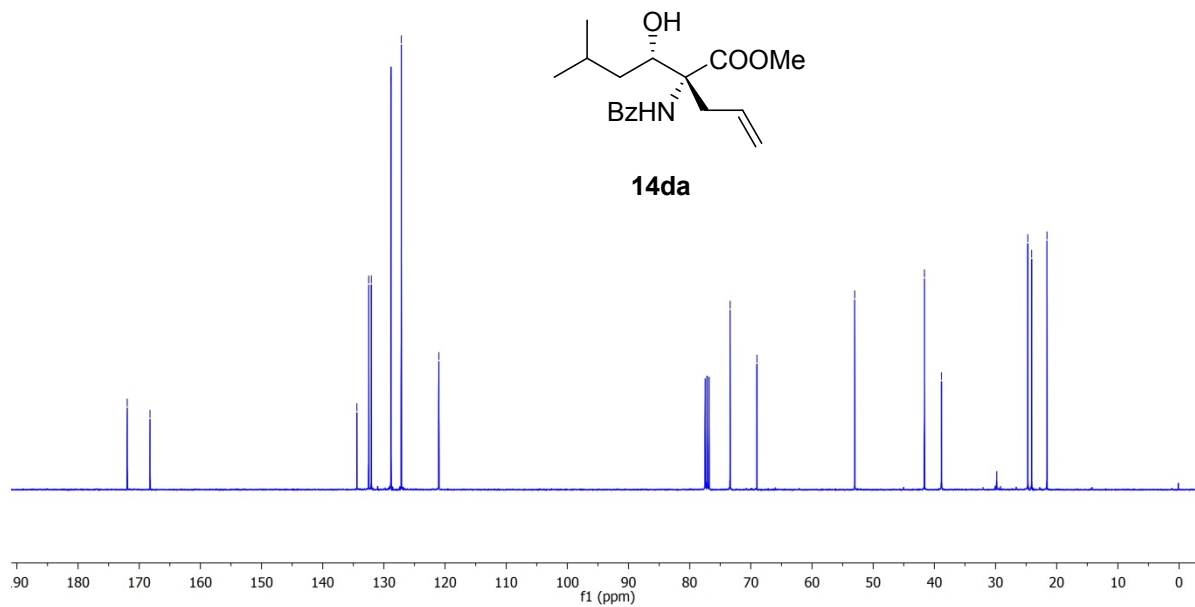

Data File C:\HPCHEM\1\DATA\YZHENG\4-39.D  
Sample Name: 4-39

```
=====
Acq. Operator   : YANG
Acq. Instrument : Deng Lab LC
Injection Date  : 10/3/2014 3:36:36 PM
Location       : Vial 21
Inj Volume     : 20 µl
Acq. Method    : C:\HPCHEM\1\METHODS\METHOD 1.M
Last changed   : 10/3/2014 3:25:09 PM by YANG
                (modified after loading)
Analysis Method: C:\HPCHEM\1\METHODS\METHOD 1.M
Last changed   : 10/4/2014 3:59:26 PM by CHAO
                (modified after loading)
Sample Info    : AD-H, Hex/IPA=90/10, 1.0 mL/min, 254nm, 47 bar, 25 C, 1
                eft
=====
```

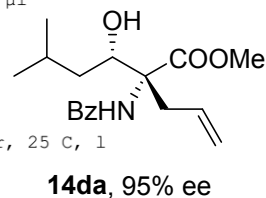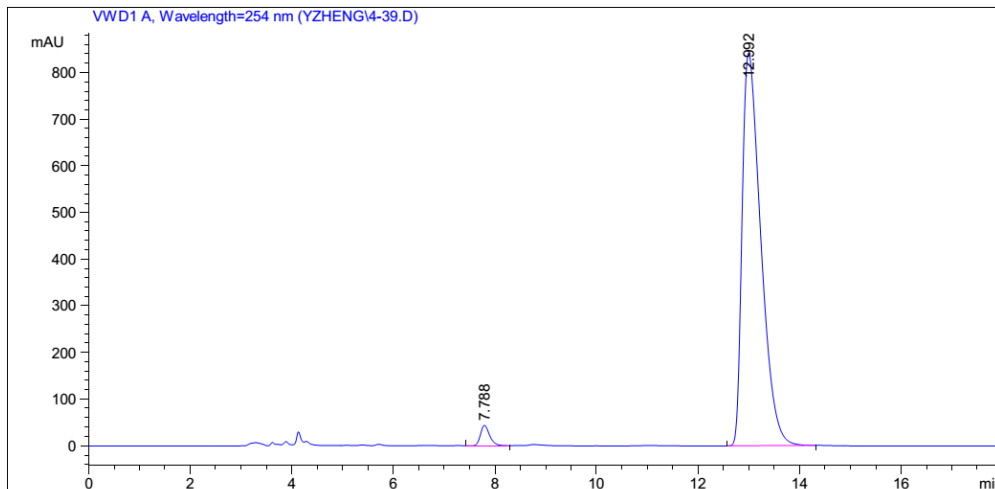

```
=====
Fraction Information
=====
Fraction collection off
=====
No Fractions found.
=====
```

Area Percent Report

```
Sorted By      : Signal
Multiplier     : 1.0000
Dilution       : 1.0000
Use Multiplier & Dilution Factor with ISTDs
```

Signal 1: VWD1 A, Wavelength=254 nm

| Peak # | RetTime [min] | Type | Width [min] | Area mAU*s | Height [mAU] | Area %  |
|--------|---------------|------|-------------|------------|--------------|---------|
| 1      | 7.788         | VV   | 0.1921      | 560.22424  | 44.05143     | 2.5360  |
| 2      | 12.992        | BB   | 0.3944      | 2.15309e4  | 842.17053    | 97.4640 |

Totals : 2.20912e4 886.22196

Data File C:\HPCHEM\1\DATA\YZHENG\4-54.D  
Sample Name: 4-54

=====  
Acq. Operator : YANG  
Acq. Instrument : Deng Lab LC Location : Vial 21  
Injection Date : 10/4/2014 4:20:21 PM Inj Volume : 20 µl  
Acq. Method : C:\HPCHEM\1\METHODS\METHOD 1.M  
Last changed : 10/4/2014 4:02:24 PM by YANG  
(modified after loading)  
Analysis Method : C:\HPCHEM\1\METHODS\METHOD 1.M  
Last changed : 10/4/2014 4:38:43 PM by CHAO  
(modified after loading)  
Sample Info : AD-H, Hex/IPA=90/10, 1.0 mL/min, 254 nm, 47 bar, 25 C,  
left

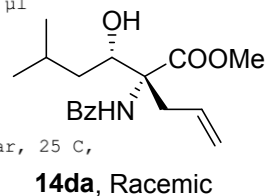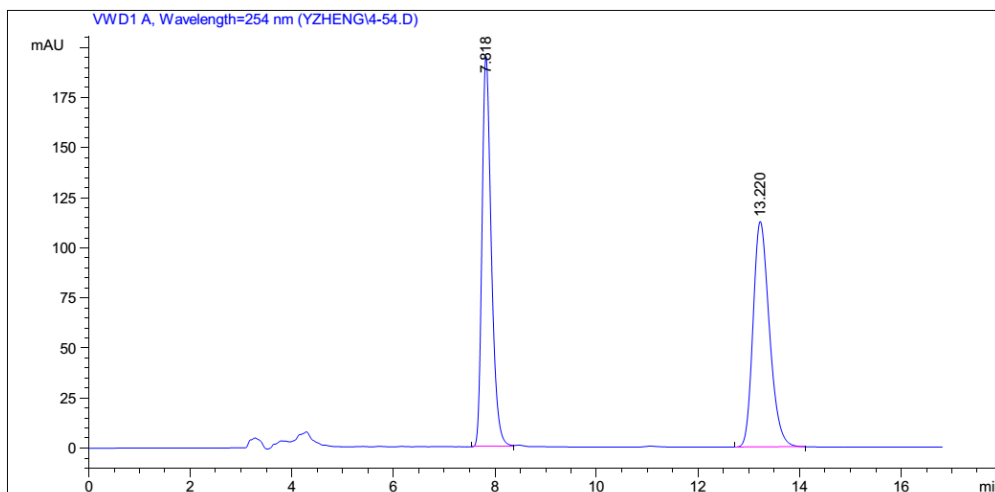

=====  
Fraction Information  
=====  
Fraction collection off  
=====  
No Fractions found.  
=====

=====  
Area Percent Report  
=====

Sorted By : Signal  
Multiplier : 1.0000  
Dilution : 1.0000  
Use Multiplier & Dilution Factor with ISTDs

Signal 1: VWD1 A, Wavelength=254 nm

| Peak #   | RetTime [min] | Type | Width [min] | Area mAU*s | Height [mAU] | Area %  |
|----------|---------------|------|-------------|------------|--------------|---------|
| 1        | 7.818         | BV   | 0.1944      | 2497.13208 | 195.17357    | 49.8004 |
| 2        | 13.220        | BB   | 0.3436      | 2517.15137 | 112.67712    | 50.1996 |
| Totals : |               |      |             | 5014.28345 | 307.85069    |         |

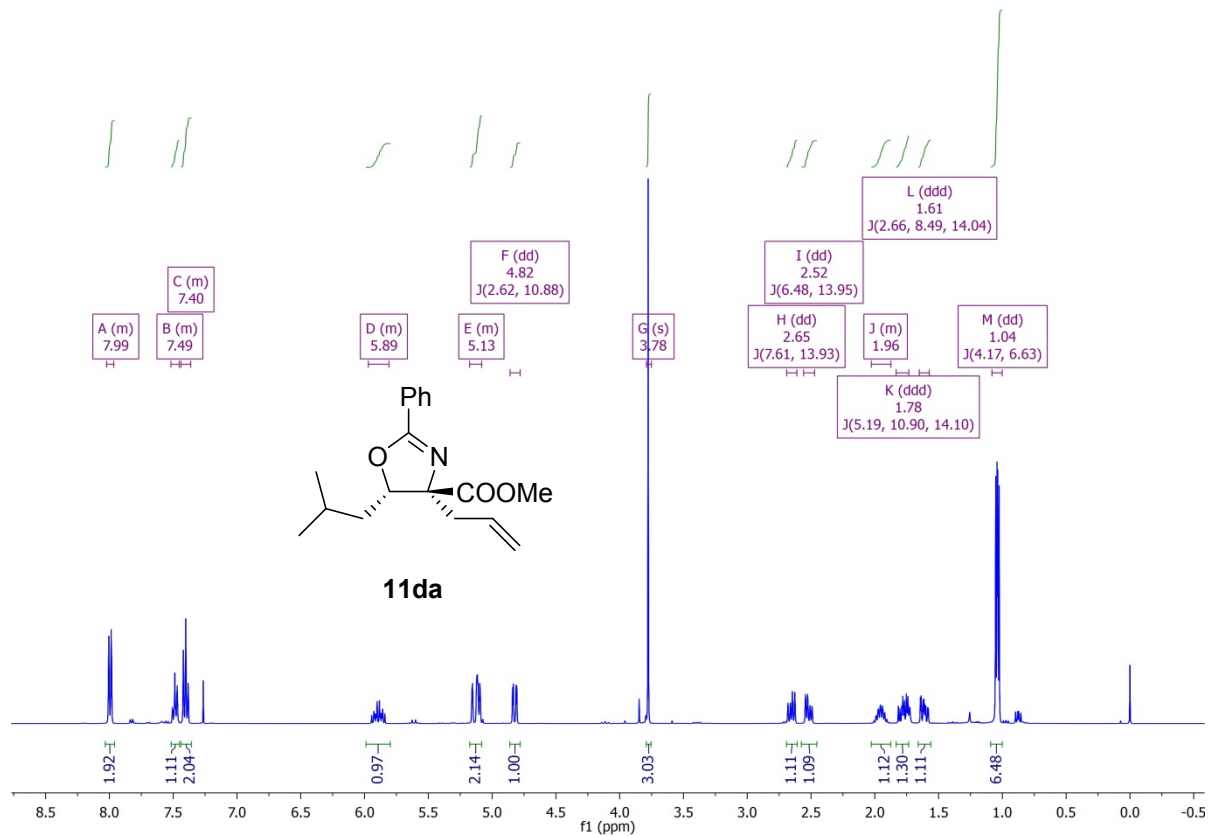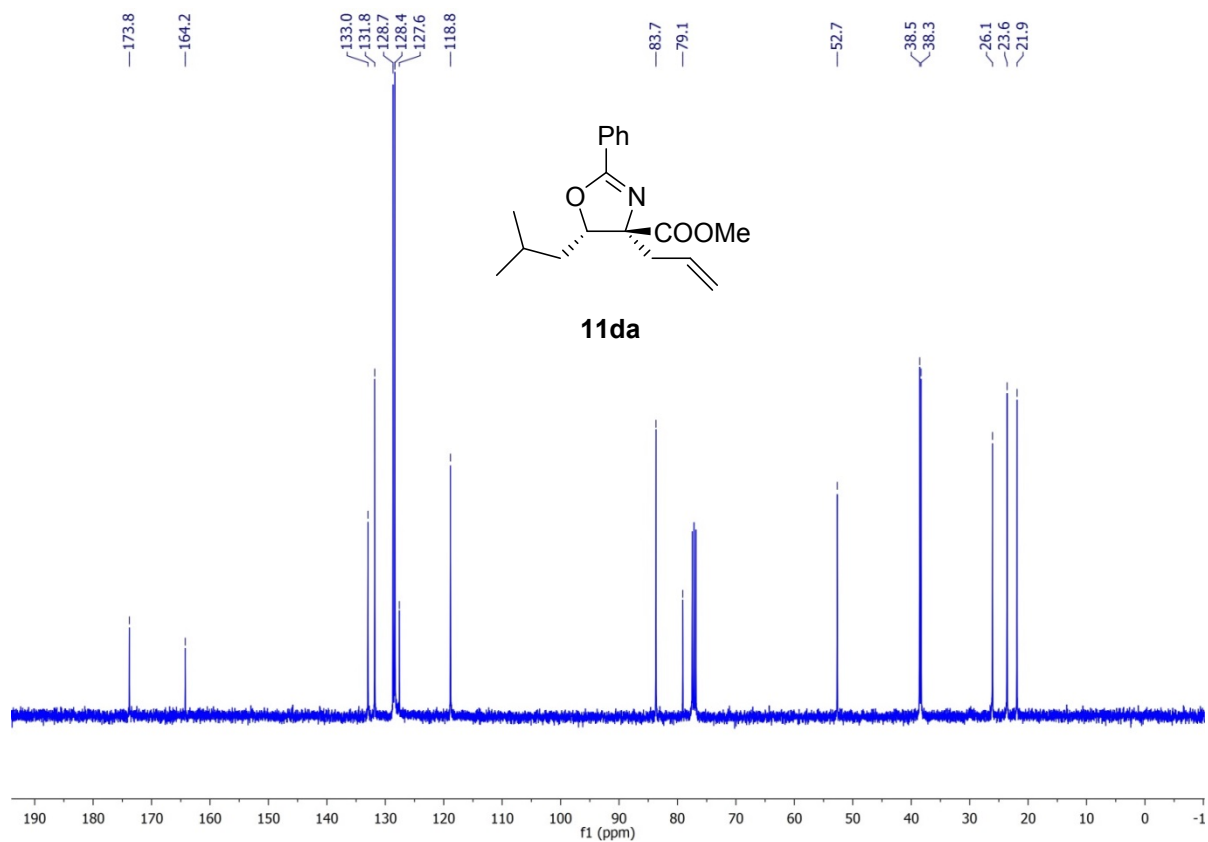



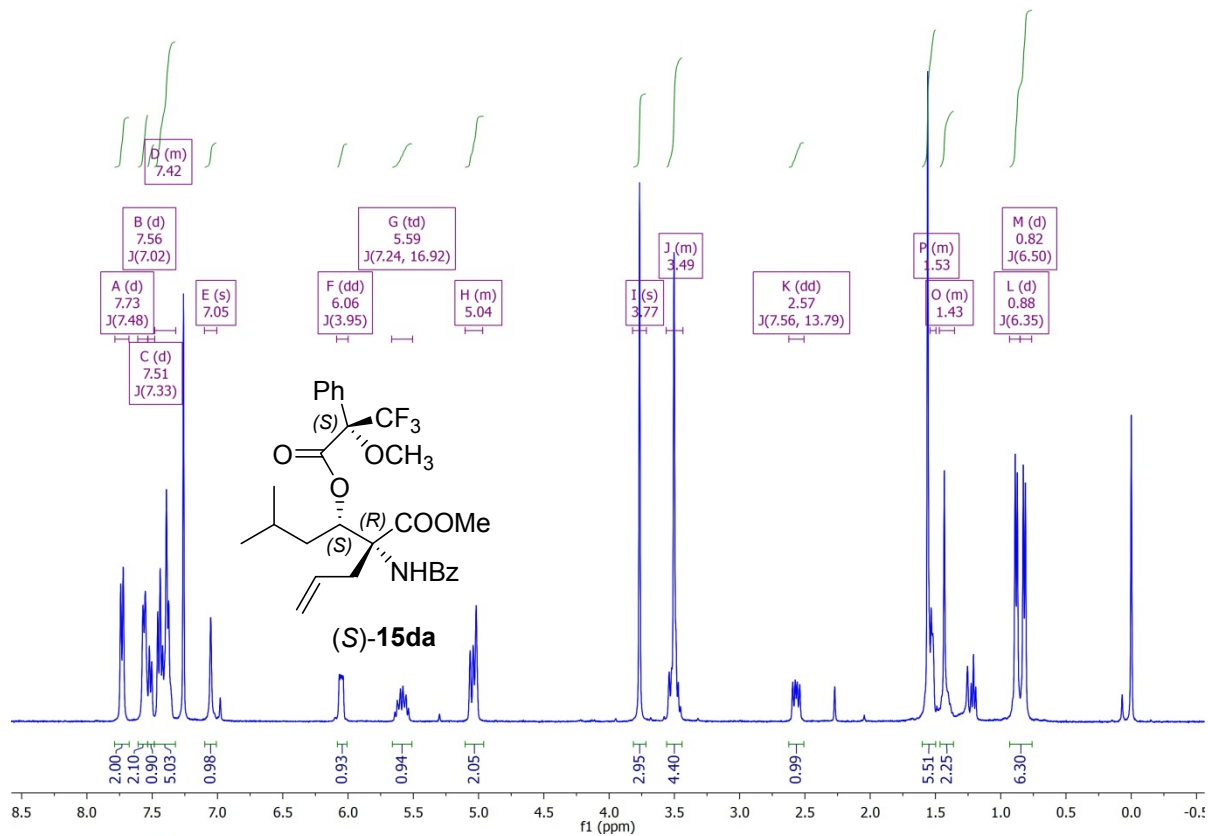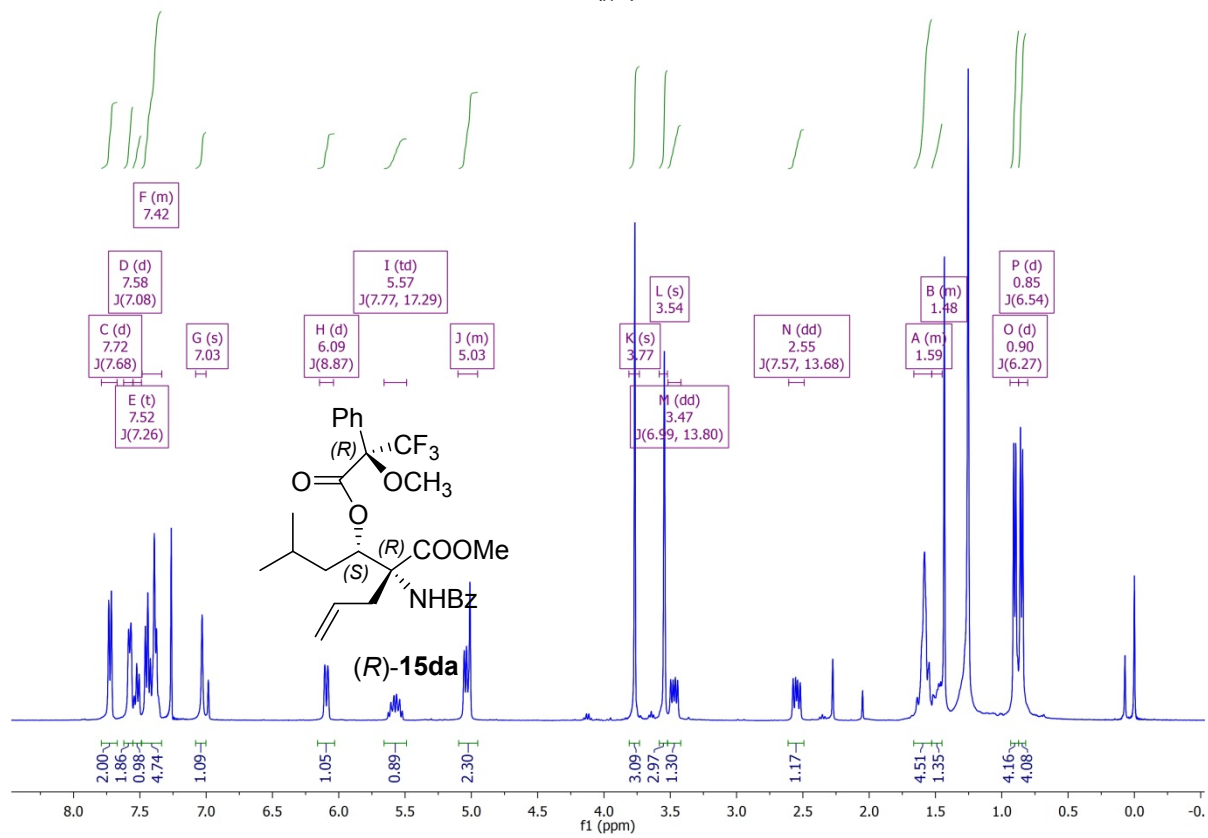

Supplement: SC-006-C5SC02116B-s001.pdf [file SC-006-C5SC02116B-s001.pdf]
